# Supplementary material
Source: publisher figshare collection journal article supplement (https://gsapubs.figshare.com/ndownloader/files/37379896)
Supplement: Supplementary file 1 [file 37379896]

## Sheet: Detrital zircon ages
Sample No	Contents/ppm				Isotope Ratios						U-Pb Age/Ma						Concordance	Remark
	Pb	Th	U	Th/U	207Pb/235U	2σ	206Pb/238U	2σ	207Pb/206Pb	2σ	207Pb/235U	2σ	206Pb/238U	2σ	207Pb/206Pb	2σ
YN-862 - 1	22.2	81.9	176.4	0.46	0.917	0.054	0.1106	0.0025	0.0594	0.0028	658	29	676.4	14	550	100	97
YN-862 - 2	23.5	72	209.2	0.34	0.835	0.036	0.1009	0.002	0.06	0.0018	614	20	619.5	12	574	67	99
YN-862 - 3	4.6	18.8	39.1	0.48	0.809	0.053	0.1024	0.0024	0.0576	0.0033	590	30	628	14	410	120	94
YN-862 - 4	26.3	111.1	275.1	0.4	0.697	0.033	0.0864	0.0018	0.0584	0.0021	535	20	534.5	11	516	79	100
YN-862 - 5	5.6	57.8	40.9	1.41	0.757	0.051	0.0946	0.0022	0.0587	0.0035	567	30	582.3	13	460	130	97
YN-862 - 6	134.2	102.9	242.5	0.42	9.26	0.39	0.4324	0.01	0.1597	0.0043	2363	38	2316	45	2449	46	98
YN-862 - 7	48.9	234	264.3	0.89	1.362	0.055	0.1432	0.0028	0.0697	0.0018	872.2	23	862.4	16	910	51	99
YN-862 - 8	34.3	152.1	266.3	0.57	0.917	0.04	0.1107	0.0022	0.0605	0.0018	659	21	676.6	13	600	67	97
YN-862 - 9	9.6	14.2	53.9	0.26	1.708	0.096	0.1696	0.0043	0.074	0.0036	1005	36	1009	24	991	100	100
YN-862 - 10	180.2	254	471	0.54	4.579	0.19	0.3016	0.0074	0.1141	0.0029	1745	34	1699	37	1864	45	97
YN-862 - 11	65.9	114.6	307.5	0.37	1.903	0.075	0.1867	0.0036	0.075	0.0018	1080.7	26	1103.1	19	1066	47	98
YN-862 - 12	12.4	82.9	69.5	1.19	1.183	0.061	0.131	0.0028	0.0669	0.0026	791	28	793.4	16	784	82	100
YN-862 - 13	2.9	11.6	13.9	0.83	1.565	0.11	0.1648	0.004	0.0705	0.0045	944	43	985	23	790	130	96
YN-862 - 14	62	137.5	550.7	0.25	0.853	0.035	0.1032	0.002	0.061	0.0016	625.2	19	632.9	12	621	55	99
YN-862 - 15	28.8	194	262	0.74	0.731	0.035	0.0921	0.0021	0.0588	0.0019	556	20	567.5	13	540	68	98
YN-862 - 16	11.2	140.1	81.2	1.73	0.71	0.036	0.0901	0.0019	0.0582	0.0023	541	21	556.1	11	489	88	97
YN-862 - 17	66.5	352.6	381.6	0.92	1.198	0.048	0.133	0.0025	0.0664	0.0016	799.6	23	804.8	14	813	52	99
YN-862 - 18	119	82.2	629	0.13	1.855	0.072	0.1767	0.0035	0.0775	0.0017	1064.3	26	1048.5	19	1128	45	99
YN-862 - 19	97.8	165.5	535	0.31	1.61	0.063	0.1631	0.0032	0.0729	0.0017	974.1	25	974	18	1008	45	100
YN-862 - 20	89.9	89.2	150.7	0.59	10.33	0.4	0.4684	0.009	0.1629	0.0036	2464.6	37	2476	39	2482	37	100
YN-862 - 21	98.3	182.8	567.9	0.32	1.457	0.057	0.1534	0.003	0.0698	0.0016	911.5	24	919.6	17	915	47	99
YN-862 - 22	83.5	317	402	0.79	1.633	0.066	0.1654	0.0032	0.0726	0.0018	981.3	25	986.6	18	996	48	99
YN-862 - 23	21.6	53.7	53.1	1.01	4.42	0.19	0.2986	0.0063	0.1076	0.0031	1710	36	1684	31	1748	56	98
YN-862 - 24	28.8	91.4	231.1	0.4	0.926	0.041	0.1093	0.0022	0.062	0.0018	665	21	668.4	13	660	63	99
YN-862 - 25	14.4	146.9	105.7	1.39	0.736	0.038	0.0918	0.0019	0.059	0.0024	556	22	565.8	11	513	91	98
YN-862 - 26	34	85.1	204	0.42	1.37	0.057	0.1441	0.0028	0.0693	0.0019	874	24	867.8	16	895	55	99
YN-862 - 27	64.3	272.2	471	0.58	1.132	0.046	0.1256	0.0025	0.0659	0.0016	767.4	22	762.7	14	792	51	99
YN-862 - 28	28.8	199	130.6	1.52	1.445	0.064	0.1481	0.003	0.071	0.0022	904	27	890.2	17	928	65	98
YN-862 - 29	19.2	145.3	146.9	0.99	0.823	0.037	0.0996	0.002	0.0601	0.0019	607	21	612.2	12	579	71	99
YN-862 - 30	60	93.7	151.5	0.62	4.835	0.19	0.3221	0.0062	0.1092	0.0026	1789	33	1800	30	1779	43	99
YN-862 - 31	15.4	43.8	96.7	0.45	1.218	0.057	0.133	0.0027	0.0667	0.0023	804	26	805.1	15	783	75	100
YN-862 - 32	167.1	206	309.2	0.67	9.31	0.36	0.414	0.008	0.163	0.0034	2367.5	36	2232	36	2485	36	94	Pb loss
YN-862 - 33	268.2	267.4	513.5	0.52	8.24	0.31	0.4134	0.0078	0.1445	0.003	2257.7	34	2230	36	2279	36	99
YN-862 - 34	30.3	204.6	275.6	0.74	0.694	0.03	0.0882	0.0017	0.0569	0.0017	533.6	18	544.9	10	458	67	98
YN-862 - 35	105	113.6	183.6	0.62	10.2	0.42	0.4461	0.0097	0.1638	0.0041	2452	38	2377	43	2491	42	97
YN-862 - 36	25.5	239	194.4	1.23	0.771	0.035	0.0958	0.0019	0.0578	0.0019	578	20	589.5	11	494	70	98
YN-862 - 37	22.9	170.2	134.1	1.27	1.095	0.05	0.1233	0.0024	0.0637	0.002	749	23	749.6	14	710	69	100
YN-862 - 38	55.7	95.6	604	0.16	0.682	0.028	0.0861	0.0017	0.0569	0.0014	527.1	17	532.6	10	476	54	99
YN-862 - 39	18.3	53.9	99.4	0.54	1.487	0.067	0.1557	0.0032	0.0686	0.0022	921	27	932.7	18	872	68	99
YN-862 - 40	122.1	227.4	366.6	0.62	3.593	0.14	0.2684	0.0052	0.0958	0.0021	1546.2	31	1533	26	1538	42	99
YN-862 - 41	46.4	182.9	289.4	0.63	1.177	0.048	0.1314	0.0025	0.0638	0.0016	788.5	22	795.8	14	721	55	99
YN-862 - 42	142.9	285.7	738.2	0.39	1.689	0.066	0.1649	0.0032	0.073	0.0016	1004.8	26	983.8	18	1009	46	98
YN-862 - 43	64.2	193.1	349.1	0.55	1.634	0.068	0.1612	0.0035	0.0719	0.002	982	27	963	20	974	57	98
YN-862 - 44	219.2	170.3	409	0.42	8.75	0.36	0.4141	0.0086	0.153	0.004	2311	37	2233	39	2377	44	97
YN-862 - 45	44.6	145	227.1	0.64	1.555	0.064	0.1598	0.0031	0.0689	0.0018	952	25	955.4	17	887	53	100
YN-862 - 46	13.4	81.5	120.1	0.68	0.735	0.036	0.0907	0.0019	0.0575	0.0021	557	21	559.3	11	481	78	100
YN-862 - 47	19	25.6	107.3	0.24	1.548	0.067	0.1597	0.0032	0.0688	0.002	946	27	955.2	18	878	63	99
YN-862 - 48	110.3	242.6	392.6	0.62	2.551	0.1	0.2213	0.0043	0.0822	0.002	1285	29	1288.5	23	1246	47	100
YN-862 - 49	162	128.8	137.6	0.94	33.34	1.3	0.7421	0.014	0.3187	0.007	3589.9	38	3578	54	3561	34	100
YN-862 - 50	31.4	330.6	238	1.39	0.72	0.035	0.089	0.0018	0.0575	0.002	550	20	549.7	11	479	76	100
YN-862 - 51	14.6	150.1	106.9	1.4	0.727	0.037	0.0924	0.0019	0.0558	0.0024	551	22	569.6	11	390	90	97
YN-862 - 52	125.3	324.7	485	0.67	2.172	0.1	0.1963	0.0045	0.08	0.0026	1171	33	1155	24	1190	64	99	inclusion
YN-862 - 53	6.5	82.8	48.1	1.72	0.713	0.045	0.0877	0.002	0.058	0.0033	538	26	541.6	12	420	120	99
YN-862 - 54	22.6	80.3	238.5	0.34	0.676	0.03	0.0838	0.0017	0.0571	0.0018	522.4	18	519	9.8	461	68	99
YN-862 - 55	88.6	108.7	135.2	0.8	11.84	0.5	0.505	0.014	0.1655	0.005	2590	40	2635	60	2508	51	98
YN-862 - 56	18.2	154.9	162.9	0.95	0.662	0.031	0.0852	0.0017	0.055	0.0019	517	20	527.3	10	397	81	98
YN-862 - 57	121	375	668	0.56	1.503	0.061	0.1527	0.0031	0.0693	0.0016	930.8	25	916.2	17	901	48	98
YN-862 - 58	96.9	48.6	628	0.08	1.397	0.054	0.145	0.0028	0.0682	0.0015	887.4	23	873	16	872	46	98
YN-862 - 59	50.3	379.9	415.2	0.91	0.738	0.034	0.091	0.002	0.057	0.0018	563	18	561.6	12	478	72	100
YN-862 - 60	179.1	361	938	0.38	1.647	0.066	0.1647	0.0037	0.0708	0.0016	986.6	25	983	20	945	45	100
YN-862 - 61	70.6	170	363	0.47	1.629	0.064	0.1646	0.0032	0.0704	0.0017	982.2	25	982.4	17	932	49	100
YN-862 - 62	64.1	1320	376.1	3.51	0.714	0.032	0.0886	0.0019	0.057	0.0019	546	19	547.5	11	488	68	100
YN-863 - 1	57.3	369	382	0.97	0.953	0.027	0.1089	0.0021	0.065	0.0016	679	14	666	12	767	50	98
YN-863 - 2	23.3	175.1	130.1	1.35	1.067	0.036	0.123	0.0023	0.0643	0.0019	736	18	747.6	13	723	65	98
YN-863 - 3	41.2	71.7	207.9	0.34	1.537	0.038	0.1626	0.0027	0.0702	0.0012	944.9	16	971	15	924	35	97
YN-863 - 4	11.4	141.3	204.1	0.69	0.299	0.013	0.0435	0.0008	0.0511	0.002	264.4	9.8	274.2	4.6	203	77	96
YN-863 - 5	42.5	455.9	852	0.54	0.3069	0.011	0.044	0.001	0.0516	0.0016	271.5	8.7	277.9	6.3	254	68	98
YN-863 - 6	18.6	96.3	141.7	0.68	0.925	0.04	0.1112	0.0022	0.0617	0.0025	663	21	679.6	13	629	86	98
YN-863 - 7	25.1	136.2	158.1	0.86	0.994	0.077	0.1099	0.0036	0.0677	0.005	698	40	672	21	830	160	96
YN-863 - 8	10.3	43.1	63.5	0.68	1.07	0.045	0.1247	0.0023	0.064	0.0024	736	23	758.6	14	712	82	97
YN-863 - 9	16.5	107.4	98.1	1.09	1.028	0.055	0.1247	0.0027	0.0621	0.0032	713	28	757	15	620	120	94
YN-863 - 10	65.9	333.2	402.7	0.83	1.096	0.029	0.126	0.0021	0.0653	0.0013	751.9	15	765.1	12	776	44	98
YN-863 - 11	56.3	245.2	342.2	0.72	1.155	0.03	0.1263	0.0021	0.0685	0.0013	778.2	14	766.8	12	871	40	99
YN-863 - 12	47.8	237.7	284.2	0.84	1.13	0.029	0.1284	0.0021	0.0658	0.0012	766.6	14	778.9	12	787	39	98
YN-863 - 13	22.8	63.5	296.9	0.21	0.511	0.015	0.0694	0.0012	0.0549	0.0013	417.8	10	432.6	7	382	54	97
YN-863 - 14	45.1	99.5	225.7	0.44	1.629	0.041	0.1683	0.0027	0.072	0.0013	979.7	16	1002.9	15	974	36	98
YN-863 - 15	11.1	69.4	134.3	0.52	0.528	0.028	0.0676	0.0014	0.0577	0.0029	427	18	421.6	8.2	460	110	99
YN-863 - 16	13.3	15.3	41	0.37	3.664	0.11	0.2699	0.0049	0.1008	0.0027	1561	25	1540	25	1623	49	99
YN-863 - 17	32.2	182.2	197.1	0.92	1.087	0.032	0.1239	0.0021	0.0648	0.0016	745	16	753.1	12	739	53	99
YN-863 - 18	16.3	63.5	136.1	0.47	0.848	0.031	0.0975	0.0019	0.0639	0.0021	621	17	599.7	11	702	70	97
YN-863 - 19	105.2	143.9	237	0.61	5.577	0.14	0.3519	0.0062	0.115	0.0017	1911	21	1943	30	1876	27	98
YN-863 - 20	25.9	236.8	525	0.45	0.3	0.01	0.0389	0.0008	0.0546	0.0016	265.8	8.1	245.9	5	371	65	92
YN-863 - 21	12	228.8	206.1	1.11	0.323	0.013	0.0423	0.0008	0.0536	0.0021	282.4	10	266.8	4.8	301	81	94
YN-863 - 22	42.3	20.6	436	0.05	0.845	0.027	0.0943	0.0017	0.0623	0.0017	621	15	581	10	673	58	93
YN-863 - 23	62.9	580	754	0.77	0.681	0.03	0.0614	0.0018	0.077	0.0024	526	18	383.8	11	1105	62	69	low concordance
YN-863 - 24	37.1	270.9	275.4	0.98	0.925	0.045	0.0997	0.0027	0.0641	0.0024	669	21	613	16	728	83	91
YN-863 - 25	143.7	107.4	376.1	0.29	5.347	0.12	0.3285	0.0055	0.1132	0.0015	1876.5	20	1831	26	1849	24	98
YN-863 - 26	53	481	297	1.62	1.09	0.03	0.1176	0.002	0.0645	0.0014	746.6	15	716.6	11	736	46	96
YN-863 - 27	39.4	290	747	0.39	0.32	0.018	0.0438	0.0014	0.0515	0.0024	281	14	276.1	8.4	242	100	98
YN-863 - 28	30.6	122.2	392.6	0.31	0.553	0.028	0.0612	0.0013	0.0631	0.0028	445	18	382.9	8.2	682	100	85
YN-863 - 29	28.6	146.8	550	0.27	0.341	0.013	0.0405	0.0008	0.0592	0.0023	297.4	10	256.2	4.9	557	85	85
YN-863 - 30	19.8	154	470.7	0.33	0.2724	0.0098	0.0365	0.0006	0.0519	0.0015	243.8	7.8	231.2	4	267	67	95
YN-863 - 31	33.9	226.3	244.7	0.92	1.064	0.045	0.0981	0.0023	0.0756	0.0021	734	22	603	13	1075	58	80	low concordance
YN-863 - 32	3.3	219	358.3	0.61	0.0492	0.0031	0.0074	0.0002	0.0473	0.0029	48.6	3	47.3	1	40	120	97	inclusion
YN-863 - 33	3.2	189.8	333	0.57	0.0569	0.0039	0.0074	0.0002	0.0549	0.0036	56	3.7	47.6	1.1	290	130	84	inclusion
YN-863 - 34	119.7	15.1	769.4	0.02	1.435	0.034	0.1452	0.0024	0.07	0.001	902.4	14	873.6	14	923	30	97
YN-863 - 35	159.1	318.3	430.9	0.74	5.648	0.13	0.2546	0.0043	0.157	0.0022	1922	20	1462	22	2422	23	73	low concordance
YN-863 - 36	23.5	122.6	144.1	0.85	1.141	0.036	0.1244	0.0021	0.0656	0.0017	770	17	755.6	12	760	56	98
YN-863 - 37	44.1	278.7	243.9	1.14	1.124	0.031	0.1243	0.0021	0.0648	0.0014	763	15	755.1	12	754	44	99
YN-863 - 38	30.3	169	176.7	0.96	1.12	0.034	0.1262	0.0022	0.0642	0.0017	760	16	765.7	13	724	54	99
YN-863 - 39	24.6	137.6	145.3	0.95	1.137	0.038	0.1251	0.0023	0.066	0.0017	767	18	759.9	13	779	57	99
YN-863 - 40	139	115.4	867	0.13	1.378	0.035	0.1424	0.0023	0.0705	0.0012	878.5	15	858.4	13	936	36	98
YN-863 - 41	39.4	280.9	369.3	0.76	0.627	0.022	0.075	0.0015	0.0619	0.0017	493	14	466.1	8.7	654	62	94
YN-863 - 42	13.7	91.2	412	0.22	0.2311	0.01	0.0287	0.0007	0.0601	0.0026	210	8.6	182.1	4.2	525	91	86	polluted
YN-863 - 43	45.9	424.4	973	0.44	0.2732	0.0073	0.0398	0.0007	0.0513	0.001	245	5.8	251.5	4.2	241	45	97
YN-863 - 44	10.6	67.4	61.2	1.1	1.071	0.044	0.1252	0.0023	0.0635	0.0023	732	22	760.2	13	677	83	96
YN-863 - 45	33.1	185	218.8	0.85	0.934	0.031	0.1109	0.0021	0.0645	0.0016	669	16	677.9	12	737	52	99
YN-863 - 46	30	155.6	170	0.92	0.944	0.04	0.1109	0.0025	0.0652	0.0022	672	21	678	14	751	73	99
YN-863 - 47	18.7	98	244.4	0.4	0.464	0.02	0.0577	0.0015	0.0619	0.002	385	14	361.5	9.3	634	68	94
YN-863 - 48	33.6	97.1	394.3	0.25	0.599	0.033	0.0701	0.0016	0.0659	0.0032	475	21	436.5	9.7	770	100	92
YN-863 - 49	42	358	352.7	1.02	0.661	0.02	0.0869	0.0018	0.0593	0.0012	515.7	12	537.2	11	557	46	96
YN-863 - 50	64.1	410	907	0.45	0.421	0.018	0.0541	0.0018	0.0603	0.0012	355	13	339	11	601	45	95
YN-869 - 1	54.1	291.3	718	0.41	0.506	0.019	0.0696	0.0016	0.0557	0.0017	415	12	433.4	9.7	430	67	96
YN-869 - 2	44.6	297	339	0.88	0.854	0.024	0.0997	0.0023	0.0668	0.0014	625.1	13	612	13	824	43	98
YN-869 - 3	28	119.1	176.6	0.67	1.377	0.043	0.1286	0.0022	0.0835	0.0021	879	18	779.8	13	1267	49	88
YN-869 - 4	71.4	421.8	1005	0.42	0.485	0.014	0.0634	0.0011	0.0592	0.0014	401.3	9.6	396.3	6.5	566	52	99
YN-869 - 5	423.4	248	1167	0.21	4.486	0.097	0.3096	0.0048	0.1125	0.0013	1727.8	18	1739.5	24	1838.1	21	99
YN-869 - 6	44	401.4	226.4	1.77	1.021	0.028	0.1218	0.002	0.0651	0.0013	712.8	14	740.8	12	769	41	96
YN-869 - 7	140.6	83.3	734.5	0.11	1.726	0.04	0.1742	0.0028	0.0765	0.0011	1018.3	15	1034.8	15	1101	29	98
YN-869 - 8	143	101.9	410.3	0.25	4.488	0.1	0.2992	0.0049	0.1148	0.0015	1727.2	19	1687	24	1876	25	98
YN-869 - 9	37.9	467	719	0.65	0.2836	0.008	0.0414	0.0007	0.0523	0.0012	253.7	6.5	261.3	4.4	286	49	97
YN-869 - 10	58.4	544	812	0.67	0.452	0.016	0.0546	0.0011	0.0626	0.0018	378.4	11	342.8	7	680	65	90
YN-869 - 11	32.8	135.5	209.1	0.65	1.265	0.055	0.127	0.0025	0.0746	0.0026	831	24	770.6	15	1050	67	92
YN-869 - 12	82.5	138.7	198.8	0.7	5.219	0.12	0.3198	0.0052	0.1124	0.0016	1854.2	20	1788	25	1834	27	96
YN-869 - 13	30.4	253	338	0.75	0.598	0.018	0.0714	0.0012	0.0568	0.0013	475.4	12	444.2	7.4	465	53	93
YN-869 - 14	85.2	107.9	377.7	0.29	2.82	0.23	0.1819	0.0034	0.1014	0.0062	1319	45	1077	18	1572	88	80	inclusion
YN-869 - 15	57.1	97.6	300.1	0.33	2.026	0.063	0.1691	0.0032	0.0797	0.0018	1122	21	1007	18	1178	43	89
YN-869 - 16	7.4	126	129	0.98	0.357	0.021	0.043	0.0009	0.055	0.0028	306	15	271.3	5.5	330	110	88
YN-869 - 17	86.3	73.8	205	0.36	6.38	0.23	0.3502	0.0086	0.1199	0.0027	2028	31	1935	41	1951	41	95
YN-869 - 18	22.4	134.3	124.4	1.08	1.383	0.043	0.1303	0.0022	0.0699	0.0018	882	17	789.5	13	909	52	89
YN-869 - 19	85.7	230.3	113	2.04	9.63	0.27	0.431	0.0082	0.1482	0.0032	2402	27	2310	37	2319	38	96
YN-869 - 20	132.8	208	601	0.35	2.619	0.061	0.1931	0.0033	0.0893	0.0013	1306.3	18	1137.8	18	1407	27	86	Pb loss
YN-869 - 21	17	191.1	182.5	1.05	0.578	0.02	0.0689	0.0012	0.0554	0.0017	462	13	429.2	7.2	389	67	93
YN-869 - 22	92	243.9	297.4	0.82	3.705	0.11	0.24	0.0045	0.1028	0.0023	1571	23	1387	24	1669	42	88	Pb loss
YN-869 - 23	102.8	52.6	251.9	0.21	6.38	0.17	0.3596	0.0064	0.1172	0.002	2027	23	1980	31	1909	30	98
YN-869 - 24	19.7	78.7	100.5	0.78	1.567	0.071	0.1505	0.0036	0.0691	0.0025	954	28	903	20	881	76	95
YN-869 - 25	149.6	51.8	389.8	0.13	5.661	0.12	0.3399	0.0053	0.1114	0.0014	1924.6	19	1886.1	26	1822	23	98
YN-869 - 26	51.9	254.2	666	0.38	0.5478	0.015	0.0677	0.0012	0.0546	0.0011	442.8	9.7	422.5	7.1	381	44	95
YN-869 - 27	47.8	288.3	338.9	0.85	1.188	0.035	0.1071	0.0018	0.0756	0.0017	794	17	656	10	1064	45	81	Pb loss
YN-869 - 28	39.1	107.5	264.4	0.41	1.64	0.05	0.1282	0.0023	0.0878	0.0024	983	19	777.3	13	1356	52	77	low concordance
YN-869 - 29	48.5	259.9	651	0.4	0.568	0.018	0.0635	0.0012	0.0616	0.0015	456.5	11	396.6	7.4	648	53	86	Pb loss
YN-869 - 30	187.6	165.7	1299	0.13	1.316	0.029	0.1316	0.002	0.0698	0.0009	852	13	796.9	12	919	28	93
YN-869 - 31	37.1	230.6	427.5	0.54	0.593	0.018	0.0722	0.0012	0.0579	0.0013	471.7	11	449	7.5	506	51	95
YN-869 - 32	27.8	299.8	554.7	0.54	0.3184	0.0095	0.0417	0.0007	0.0544	0.0013	280.1	7.3	263.3	4.2	362	55	94
YN-869 - 33	186.3	48.1	462.9	0.1	5.649	0.13	0.3631	0.0059	0.1155	0.0015	1923.9	20	1997	28	1885	24	96
YN-869 - 34	169.4	186.7	176.8	1.06	21.38	0.47	0.6463	0.01	0.2457	0.003	3154.7	21	3213	40	3155	20	98
YN-869 - 35	108.1	153.3	263	0.58	5.306	0.14	0.3446	0.0063	0.1104	0.0023	1868	23	1908	30	1801	38	98
YN-869 - 36	7.1	305	231	1.32	0.157	0.0082	0.0209	0.0004	0.0538	0.0027	147.3	7.2	133.1	2.5	290	100	90
YN-869 - 37	139.4	68.1	352	0.19	5.617	0.13	0.3514	0.0059	0.1136	0.0015	1917.3	20	1940	28	1857	23	99
YN-869 - 38	36.9	50.7	60	0.85	10.83	0.36	0.4891	0.01	0.1543	0.0037	2505	32	2566	44	2388	41	98
YN-869 - 39	125.9	145	199.1	0.73	10.32	0.26	0.4642	0.0085	0.1569	0.0028	2462	23	2457	38	2418	30	100
YN-869 - 40	10	75.5	106.6	0.71	0.567	0.025	0.0698	0.0013	0.0568	0.0022	452	16	434.8	8.1	427	84	96
YN-869 - 41	26.8	224.5	357.3	0.63	0.476	0.014	0.0621	0.001	0.0534	0.0013	394.4	9.9	388.3	6.2	321	55	98
YN-869 - 42	14.6	66.6	80.1	0.83	1.293	0.064	0.137	0.0029	0.0651	0.0028	837	28	828	16	744	98	99
YN-869 - 43	82.4	437.2	374	1.17	1.598	0.04	0.1611	0.0028	0.0686	0.0011	969.1	16	962.7	16	876	34	99
YN-869 - 44	24	51.2	194.9	0.26	1.118	0.039	0.1116	0.0021	0.0687	0.0019	759	19	681.9	12	867	60	89	Pb loss
YN-869 - 45	19.5	88.2	249.9	0.35	0.565	0.021	0.0701	0.0013	0.0556	0.002	455	14	436.8	7.7	412	75	96
YN-869 - 46	284.8	117.8	494.1	0.24	11.564	0.25	0.4849	0.0078	0.1637	0.0021	2569	21	2548	34	2493	20	99
YN-869 - 47	10.9	142	176.4	0.8	0.368	0.016	0.0472	0.0008	0.0536	0.0021	316	12	297.6	5.2	300	85	94
YN-869 - 48	14.9	288.6	248.5	1.16	0.355	0.015	0.0433	0.0008	0.0564	0.0022	306	11	273.4	4.8	402	84	89
YN-869 - 49	15.8	157.6	326.5	0.48	0.2981	0.011	0.0415	0.0007	0.0495	0.0016	264	8.4	262.3	4.3	149	67	99
YN-869 - 50	469	505.1	774	0.65	9.79	0.25	0.452	0.0087	0.1511	0.0023	2414	24	2404	39	2360	23	100
YN-869 - 51	199.2	262.6	486.5	0.54	5.432	0.12	0.3371	0.0054	0.1123	0.0015	1888.8	19	1873	26	1836	23	99
YN-869 - 52	45.9	345.9	626	0.55	0.556	0.024	0.0648	0.0013	0.0596	0.0021	448	15	405.8	8.6	566	74	90
YN-881 - 1	131.9	219.4	429.5	0.51	3.243	0.098	0.2562	0.0045	0.0916	0.0015	1466	23	1470	23	1454	31	100
YN-881 - 2	17.6	29.2	44.9	0.65	4.479	0.15	0.3066	0.0058	0.1067	0.0024	1723	28	1723	28	1729	41	100
YN-881 - 3	9.7	29.7	49.9	0.6	1.555	0.069	0.158	0.003	0.072	0.0027	951	28	945.6	17	946	75	99
YN-881 - 4	42.4	142	225.7	0.63	1.452	0.046	0.1516	0.0026	0.0695	0.0013	908	19	909.9	15	907	40	100
YN-881 - 5	33.1	176.1	157.8	1.12	1.464	0.048	0.1526	0.0027	0.0702	0.0016	916	20	915.6	15	926	45	100
YN-881 - 6	114.7	946	1004	0.94	0.706	0.021	0.0853	0.0015	0.06	0.001	541.5	13	527.6	9.1	594	35	97
YN-881 - 7	67.1	99.6	120.1	0.83	7.807	0.22	0.4133	0.007	0.138	0.0018	2208.5	26	2229	32	2200	23	99
YN-881 - 8	119.4	182	269.1	0.68	5.432	0.15	0.3431	0.0057	0.1155	0.0014	1889.6	23	1901	28	1883	23	99
YN-881 - 9	30.1	64.7	144.2	0.45	1.758	0.056	0.1739	0.003	0.0739	0.0015	1027	20	1033.5	17	1018	42	99
YN-881 - 10	96.3	129.6	581	0.22	1.427	0.042	0.149	0.0026	0.0699	0.001	899	17	895.1	14	918	29	100
YN-881 - 11	249.7	56.9	712	0.08	5.093	0.16	0.3231	0.0068	0.1145	0.0014	1834	26	1804	33	1870	22	98
YN-881 - 12	80.3	58.5	124.5	0.47	11.33	0.33	0.4913	0.0099	0.1694	0.003	2550	28	2575	43	2548	29	99
YN-881 - 13	82.7	101.9	167.4	0.61	6.887	0.19	0.3829	0.0065	0.1314	0.0017	2095.5	25	2090	30	2112	23	100
YN-881 - 14	37.8	154.7	133.5	1.16	2.164	0.067	0.2017	0.0035	0.0785	0.0016	1167	22	1184.1	19	1142	39	99
YN-881 - 15	38.2	100	155	0.65	2.089	0.066	0.1971	0.0034	0.0775	0.0015	1142	22	1159.4	18	1119	38	98
YN-881 - 16	39.8	94.6	126.8	0.75	2.9	0.089	0.2405	0.0042	0.0881	0.0017	1379	23	1389	22	1376	38	99
YN-881 - 17	5.2	95.3	76.4	1.25	0.369	0.022	0.0483	0.001	0.0551	0.003	315	16	304.1	6.1	350	120	96
YN-881 - 18	42.8	264	542	0.49	0.542	0.019	0.0701	0.0013	0.0568	0.0015	439.3	13	436.8	8	466	57	99
YN-881 - 19	393.2	132.7	663	0.2	10.89	0.33	0.4731	0.0089	0.1704	0.0026	2513	28	2497	39	2560	26	99
YN-881 - 20	141.6	100.6	240.1	0.42	11.1	0.32	0.4814	0.009	0.1681	0.0024	2531	27	2533	39	2536	24	100
YN-881 - 21	74.8	56.9	97.9	0.58	15.18	0.47	0.5487	0.011	0.2057	0.0042	2825	30	2819	45	2867	33	100
YN-881 - 22	20.6	151.6	234.5	0.65	0.538	0.019	0.0712	0.0012	0.0556	0.0016	436.8	13	443.1	7.5	410	60	99
YN-881 - 23	24.7	157.6	282	0.56	0.569	0.02	0.0722	0.0013	0.0578	0.0015	455.8	13	449.6	7.7	490	56	99
YN-881 - 24	139.7	274.1	283	0.97	6.149	0.18	0.3684	0.0067	0.1219	0.0018	1996	25	2022	31	1985	25	99
YN-881 - 25	73.5	75.3	184	0.41	5.382	0.15	0.3439	0.0057	0.1155	0.0017	1881.5	25	1905	27	1881	26	99
YN-881 - 26	87.8	707	1123	0.63	0.543	0.02	0.0657	0.0013	0.0604	0.0015	440.2	13	410.4	7.7	606	54	93
YN-881 - 27	105.1	116	159.8	0.73	11.1	0.31	0.4855	0.0081	0.1678	0.0021	2530.2	26	2551	35	2532	21	99
YN-881 - 28	111.2	67.1	284.5	0.24	5.415	0.15	0.3402	0.0059	0.1164	0.0014	1886.5	23	1887	28	1899	22	100
YN-881 - 29	51.2	165.4	271.4	0.61	1.523	0.052	0.1571	0.0028	0.0709	0.0016	938	21	940.4	16	941	47	100
YN-881 - 30	33.8	200.1	193.8	1.03	1.123	0.039	0.1279	0.0022	0.0646	0.0016	763	18	776	12	736	52	98
YN-881 - 31	41.6	209.8	250.6	0.84	1.14	0.035	0.1284	0.0022	0.0652	0.0013	772	17	778.5	12	767	42	99
YN-881 - 32	14.7	141	153.7	0.92	0.553	0.023	0.073	0.0013	0.0556	0.0019	446	15	454.1	8	387	72	98
YN-881 - 33	51.9	212	584	0.36	0.591	0.018	0.0768	0.0014	0.0568	0.0011	470.9	12	476.9	8.2	465	43	99
YN-881 - 34	29.2	141.2	163.6	0.86	1.219	0.041	0.1374	0.0024	0.0653	0.0015	807	19	829.6	14	764	50	97
YN-881 - 35	126.2	233.2	834	0.28	1.287	0.038	0.1357	0.0025	0.0692	0.0011	839.4	17	820.5	14	900	34	98
YN-881 - 36	13.1	117.4	145.6	0.81	0.514	0.023	0.0698	0.0013	0.0545	0.0022	418	15	435	7.7	331	86	96
YN-881 - 37	13.7	88	78.6	1.12	1.084	0.045	0.1254	0.0023	0.0638	0.0023	744	23	761.2	13	711	73	98
YN-881 - 38	66.3	122.6	154.9	0.79	4.763	0.14	0.3243	0.0055	0.1079	0.0015	1776.5	24	1810	27	1758	25	98
YN-881 - 39	26.5	274.7	287.3	0.96	0.54	0.019	0.0712	0.0013	0.0557	0.0013	437	12	443.5	7.6	424	54	99
YN-881 - 40	19.1	157.1	360.7	0.44	0.3193	0.011	0.0451	0.0008	0.0521	0.0014	280.7	8.6	284.3	4.8	264	57	99
YN-881 - 41	16.4	202.9	257.6	0.79	0.343	0.018	0.0474	0.001	0.054	0.0026	298	13	298.7	6	320	100	100
YN-881 - 42	290.8	393	433.5	0.91	10.866	0.29	0.4791	0.0079	0.1669	0.0018	2511.7	26	2523	34	2524.4	18	100
YN-881 - 43	24.1	113.3	288	0.39	0.536	0.018	0.0724	0.0012	0.0545	0.0013	434.6	12	450.7	7.5	364	54	96
YN-881 - 44	104.6	115.4	252.8	0.46	7.13	0.21	0.3279	0.0062	0.1596	0.0019	2124	27	1827	30	2448	21	85	Pb loss
YN-881 - 45	85.3	211.9	1302	0.16	0.4506	0.013	0.06	0.001	0.0552	0.0009	377.4	9.2	375.4	6.1	411	35	99
YN-881 - 46	82.9	154.2	191.9	0.8	5.096	0.14	0.3275	0.0055	0.1144	0.0015	1833.7	24	1826	27	1865	24	100
YN-881 - 47	12.7	110.8	181.1	0.61	0.431	0.018	0.0574	0.001	0.0552	0.0018	362.1	13	359.6	6.3	382	70	99
YN-881 - 48	41.9	280.7	484	0.58	0.537	0.017	0.0708	0.0012	0.0557	0.0012	436.2	12	440.8	7.1	426	48	99
YN-881 - 49	7.4	88.7	136.1	0.65	0.393	0.026	0.0484	0.0012	0.0587	0.0034	335	19	304.9	7.3	520	130	91
YN-881 - 50	65.1	517	821	0.63	0.5159	0.016	0.0679	0.0012	0.0558	0.0009	421.9	11	423.3	7.2	438	37	100
YN-881 - 51	20.6	95.6	117.9	0.81	1.227	0.043	0.1343	0.0023	0.0672	0.0017	809	20	812.1	13	816	56	100
YN-881 - 52	39.8	69.2	225.7	0.31	1.465	0.044	0.1544	0.0026	0.0697	0.0012	914.7	18	925.7	15	908	37	99
YN-881 - 53	112.7	103	213.9	0.48	8.065	0.22	0.4204	0.007	0.1408	0.0016	2237.3	25	2262	32	2234	20	99
YN-881 - 54	93.2	477.9	450.4	1.06	1.443	0.041	0.1509	0.0025	0.0701	0.001	906.1	17	906.1	14	922	31	100
YN-881 - 55	26.3	190.1	295.8	0.64	0.558	0.02	0.0727	0.0012	0.0563	0.0014	448.8	13	452.1	7.5	440	57	99
YN-881 - 56	35.1	127.2	207.7	0.61	1.19	0.056	0.1298	0.0034	0.0685	0.0028	793	26	786	19	857	85	99
YN-881 - 57	116	96.6	168.2	0.57	11.98	0.33	0.5272	0.0089	0.1672	0.002	2602.5	26	2729	38	2526	20	95
YN-881 - 58	128.4	71.5	223	0.32	10.096	0.27	0.4656	0.0078	0.1592	0.0018	2442.7	25	2464	34	2445	19	99
YN-881 - 59	50.5	43.1	296.2	0.15	1.51	0.045	0.1567	0.0026	0.0707	0.0011	934	18	938.5	15	943	32	100
YN-881 - 60	129.9	103.6	351.1	0.3	4.622	0.13	0.3159	0.0052	0.1075	0.0013	1752.4	23	1769.5	25	1753	22	99
YN-881 - 61	61.1	148.1	232.2	0.64	2.36	0.068	0.2112	0.0035	0.082	0.0012	1229.2	21	1234.8	19	1238	29	100
YN-881 - 62	57.4	61.4	358.2	0.17	1.396	0.039	0.1457	0.0024	0.0702	0.001	886.4	17	876.9	14	927	29	99
YN-881 - 63	50	187.7	289.2	0.65	1.23	0.038	0.1354	0.0023	0.0666	0.0012	812.7	17	818.7	13	811	39	99
YN-881 - 64	79.5	50	484.7	0.1	1.441	0.042	0.153	0.0026	0.0691	0.001	905.8	18	917.7	15	894	30	99
YN-881 - 65	106.9	82	682	0.12	1.422	0.043	0.15	0.0029	0.0695	0.0009	896.8	18	901	16	908	26	100
YN-881 - 66	41.7	67.1	150.9	0.44	2.629	0.087	0.2267	0.0047	0.0856	0.0018	1306	24	1317	25	1318	42	99
YN-881 - 67	16.7	249	262.7	0.95	0.294	0.012	0.0426	0.0008	0.0506	0.0017	260.8	9	269	4.8	207	73	97
YN-881 - 68	11.7	80.6	229.2	0.35	0.322	0.014	0.0446	0.0008	0.0531	0.0019	282.1	11	281	5	288	77	100
YN-881 - 69	36.9	406	685	0.59	0.3141	0.01	0.0443	0.0008	0.052	0.0011	276.9	7.9	279.4	4.9	275	47	99
YN-881 - 70	17.2	93.8	234	0.4	0.488	0.019	0.0644	0.0011	0.0561	0.0017	403.1	13	402	6.9	412	67	100
YN-881 - 71	74.8	31.1	194.2	0.16	5.441	0.16	0.3464	0.0061	0.1147	0.0019	1890	26	1917	29	1870	30	99
YN-881 - 72	101	93.5	649.6	0.14	1.36	0.039	0.1434	0.0024	0.0694	0.001	871	17	863.9	14	906	28	99
YN-881 - 73	108.7	125.9	250.1	0.5	5.577	0.16	0.3511	0.0058	0.1161	0.0015	1910.7	24	1939	28	1895	23	99
YN-881 - 74	82.1	219	223.3	0.98	3.525	0.1	0.2717	0.0046	0.095	0.0014	1531.2	22	1549	23	1520	27	99
YN-881 - 75	182.6	159.2	434.8	0.37	5.51	0.15	0.3477	0.0058	0.1158	0.0014	1901.2	24	1923	28	1889	21	99
YN-881 - 76	10	28.7	58.5	0.49	1.401	0.062	0.1457	0.0029	0.0702	0.0024	883	26	876	16	891	74	99
YN-881 - 77	153.7	160.5	375.9	0.43	5.249	0.14	0.3378	0.0056	0.1136	0.0013	1859.6	23	1875.8	27	1855	21	99
YN-881 - 78	12.2	106.1	130.4	0.81	0.559	0.023	0.0733	0.0013	0.056	0.0019	450	15	456.1	7.9	403	71	99
YN-881 - 79	35.5	328	403.1	0.81	0.515	0.018	0.0686	0.0012	0.0552	0.0014	420.8	12	427.4	7.1	389	55	98
YN-881 - 80	30.4	107.7	153.5	0.7	1.495	0.048	0.1577	0.0027	0.0693	0.0015	926	19	943.7	15	893	43	98
YN-881 - 81	48	260.1	379.9	0.68	0.841	0.026	0.1017	0.0017	0.0605	0.0011	618.9	14	624.2	9.9	605	39	99
YN-881 - 82	8.5	92	139.3	0.66	0.335	0.016	0.0481	0.0009	0.0512	0.0022	292	12	302.5	5.6	209	90	96
YN-881 - 83	82.7	88.8	135.9	0.65	10.31	0.29	0.463	0.0079	0.1624	0.002	2461	26	2452	35	2479	21	100
YN-881 - 84	29.8	73.5	204.3	0.36	1.159	0.039	0.1275	0.0022	0.0664	0.0016	779	18	773.7	12	797	50	99
YN-881 - 85	90.5	191.2	256.7	0.74	3.667	0.1	0.2731	0.0045	0.0982	0.0012	1563.2	22	1556.3	23	1586	23	100
YN-881 - 86	39.6	184.8	257.9	0.72	1.131	0.035	0.1275	0.0022	0.0649	0.0013	766.4	17	773.4	12	752	42	99
YN-881 - 87	86.1	179.4	260.7	0.69	3.333	0.095	0.2607	0.0044	0.0933	0.0013	1487.1	22	1493	23	1488	27	100
YN-881 - 88	24.7	51.1	97.7	0.52	2.34	0.078	0.2135	0.0042	0.0799	0.0017	1220	24	1247	22	1186	41	98
YN-881 - 89	283	232	733.3	0.32	5.109	0.14	0.3261	0.0058	0.1142	0.0013	1836.4	23	1819	28	1865	20	99
YN-881 - 90	151.8	96.7	176.8	0.55	20.78	0.56	0.6344	0.011	0.239	0.0027	3129.3	25	3168	41	3112	18	99
YN-881 - 91	20.9	137.2	236.7	0.58	0.571	0.02	0.0724	0.0013	0.0576	0.0016	458.2	13	450.5	7.6	487	57	98
YN-881 - 92	5.6	41.2	108.9	0.38	0.318	0.019	0.0442	0.0009	0.0524	0.0029	277	15	278.9	5.6	220	110	99
YN-881 - 93	17.9	144.5	187.5	0.77	0.58	0.022	0.0754	0.0014	0.0561	0.0015	462	14	468.4	8.2	428	60	99
YN-881 - 94	9.1	95.8	109.3	0.88	0.53	0.041	0.0705	0.0023	0.0565	0.0045	437	31	439	14	420	160	100
YN-881 - 95	32.6	162.7	225.2	0.72	1.151	0.036	0.1274	0.0021	0.066	0.0013	777	17	773.7	12	791	41	100
YN-881 - 96	137	29.7	353.4	0.08	5.43	0.15	0.3437	0.0059	0.1149	0.0014	1888.5	24	1904	28	1876	22	99
YN-881 - 97	130.3	158	249.2	0.63	7.706	0.21	0.4096	0.007	0.1365	0.0017	2196.2	25	2213	32	2180	22	99
YN-882 - 1	32	311	312.1	1	0.59	0.022	0.077	0.0009	0.0557	0.0017	470.7	14	478.1	5.2	416	70	98
YN-882 - 2	10.7	57.8	65.6	0.88	1.122	0.051	0.1251	0.0017	0.0648	0.0026	760	24	759.5	9.6	726	86	100
YN-882 - 3	12.1	119	131.7	0.9	0.543	0.025	0.0719	0.001	0.0547	0.0023	438	16	447.4	6	361	92	98
YN-882 - 4	92.1	107.5	538.8	0.2	1.484	0.048	0.1552	0.0017	0.0693	0.0018	923.1	19	930	9.5	902	52	99
YN-882 - 5	167.5	162.6	410.1	0.4	5.335	0.17	0.3407	0.0035	0.1135	0.0028	1873.4	27	1889.9	17	1853	44	99
YN-882 - 6	54.6	147.6	110.9	1.33	5.318	0.17	0.3383	0.0039	0.1141	0.003	1870	28	1878	19	1861	49	100
YN-882 - 7	74.8	170.9	170.3	1	4.892	0.16	0.3178	0.0035	0.1115	0.0028	1799	27	1779	17	1819	46	99
YN-882 - 8	25.7	238.9	129.7	1.84	1.118	0.043	0.1258	0.0016	0.0647	0.0022	760	21	764	9	731	71	99
YN-882 - 9	75.3	121	172	0.7	5.253	0.17	0.341	0.0039	0.1117	0.0029	1859	28	1891	19	1820	47	98
YN-882 - 10	30.2	126.1	381	0.33	0.54	0.02	0.0716	0.0008	0.0545	0.0017	437	13	446	4.9	385	74	98
YN-882 - 11	36.2	468.1	555.2	0.84	0.3633	0.014	0.0496	0.0007	0.0529	0.0016	313.9	10	312.4	4	308	70	100
YN-882 - 12	79.3	181.9	257.7	0.71	2.905	0.097	0.2384	0.0028	0.0885	0.0025	1382	25	1378.3	14	1385	54	100
YN-882 - 13	31.6	59.1	43.7	1.35	10.89	0.37	0.4799	0.0066	0.1651	0.0046	2513	30	2525	29	2499	47	100
YN-882 - 14	17.2	72.4	98.8	0.73	1.278	0.052	0.1382	0.0018	0.067	0.0024	832	23	834.5	10	809	76	100
YN-882 - 15	218	97.3	537	0.18	5.876	0.18	0.3543	0.0037	0.1202	0.0029	1957.5	28	1955	18	1957	43	100
YN-882 - 16	59.1	281.9	281	1	1.562	0.059	0.1627	0.0023	0.0695	0.0022	954	23	971.8	13	901	66	98
YN-882 - 17	30.1	282.3	324.8	0.87	0.542	0.021	0.0715	0.0008	0.055	0.0018	438.2	14	445.1	5.1	381	74	98
YN-882 - 18	9.7	115	196.5	0.59	0.295	0.014	0.0413	0.0006	0.052	0.0023	261	11	260.8	3.5	235	95	100
YN-882 - 19	33.2	221.1	380.6	0.58	0.558	0.021	0.0716	0.0008	0.0565	0.0018	449.2	13	445.9	4.7	452	68	99
YN-882 - 20	37.9	138.8	191.1	0.73	1.53	0.054	0.1589	0.0017	0.0698	0.002	943	22	950.8	9.6	907	64	99
YN-882 - 21	17.1	74	93.6	0.79	1.323	0.053	0.1431	0.0018	0.067	0.0023	851	23	861.8	10	800	75	99
YN-882 - 22	18	156.2	189.4	0.82	0.567	0.023	0.0737	0.0009	0.0559	0.0021	454	15	458.5	5.5	409	82	99
YN-882 - 23	68.9	165.8	985	0.17	0.4837	0.016	0.0643	0.0007	0.0544	0.0014	400.2	11	401.9	4.1	379	60	100
YN-882 - 24	65.2	937	1433	0.65	0.2623	0.0099	0.0358	0.0004	0.0533	0.0017	236.2	7.9	226.7	2.5	329	70	96
YN-882 - 25	29.5	636	423	1.5	0.329	0.017	0.0466	0.0009	0.0518	0.0026	289	14	293.4	5.7	239	110	98
YN-882 - 26	151.4	159.3	366.6	0.43	5.25	0.19	0.3282	0.0053	0.116	0.0035	1859	31	1829	26	1892	55	98
YN-882 - 27	47.8	332.5	515.7	0.64	0.5803	0.02	0.0754	0.0008	0.0558	0.0016	464	13	468.9	5	426	64	99
YN-882 - 28	81.5	585	441.4	1.33	1.112	0.037	0.1267	0.0014	0.0638	0.0017	758.9	18	768.8	8.1	726	57	99
YN-882 - 29	24.4	84	256	0.33	0.655	0.025	0.0819	0.0009	0.0578	0.0019	509.7	15	507.4	5.6	498	74	100
YN-882 - 30	20.5	59	335	0.18	0.428	0.018	0.0577	0.0009	0.0536	0.0018	360.4	12	361.6	5.4	337	77	100
YN-882 - 31	40.5	270.8	476	0.57	0.5492	0.019	0.0702	0.0008	0.0567	0.0017	443.7	13	437.5	5	465	66	99
YN-882 - 32	161.1	210.1	356.7	0.59	5.691	0.18	0.3578	0.004	0.1153	0.0028	1929.9	26	1971	19	1883	43	98
YN-882 - 33	273.7	243.1	446	0.55	11.014	0.34	0.4791	0.0053	0.1667	0.004	2524.7	30	2523	23	2523	41	100
YN-882 - 34	56.8	458	526.9	0.87	0.656	0.022	0.0828	0.0009	0.0574	0.0016	512	14	512.7	5.5	493	62	100
YN-882 - 35	28.3	134.4	156.8	0.86	1.157	0.042	0.1289	0.0016	0.0652	0.002	778	20	781.7	9.2	763	63	100
YN-882 - 36	14.5	131.9	198	0.67	0.43	0.019	0.0592	0.0008	0.0527	0.002	361.6	13	370.5	4.5	290	81	98
YN-882 - 37	70.7	87.4	166.4	0.53	5.413	0.17	0.342	0.0037	0.1151	0.0029	1887.6	27	1897	18	1876	45	100
YN-882 - 38	110.3	160.8	288.5	0.56	4.468	0.14	0.3079	0.0036	0.1052	0.0026	1723.4	27	1730	18	1713	46	100
YN-882 - 39	146.3	64.6	378	0.17	5.356	0.17	0.3396	0.0036	0.1143	0.0028	1877.7	26	1884	17	1867	43	100
YN-882 - 40	19.6	172	216.6	0.79	0.554	0.022	0.0708	0.0009	0.0567	0.002	445.5	15	441.1	5.2	445	80	99
YN-882 - 41	174.1	95.5	443	0.22	5.282	0.17	0.3376	0.0036	0.1135	0.0028	1864.8	27	1875	17	1853	45	99
YN-882 - 42	58.6	508.2	633	0.8	0.5558	0.019	0.0722	0.0009	0.0559	0.0016	449	13	449.5	5.5	435	63	100
YN-882 - 43	33.6	177.8	211.5	0.84	1.146	0.044	0.126	0.0016	0.0659	0.0022	774	21	764.9	9.4	785	71	99
YN-882 - 44	82.6	171.7	253	0.68	3.328	0.11	0.2585	0.0029	0.0933	0.0024	1485.9	26	1482	15	1487	50	100
YN-882 - 45	25.2	136.4	278.4	0.49	0.582	0.022	0.076	0.0009	0.0553	0.0017	464.5	14	472.4	5.2	403	72	98
YN-882 - 46	60.7	273.5	807	0.34	0.5006	0.017	0.0651	0.0007	0.0556	0.0015	411.7	11	406.3	4.4	431	61	99
YN-882 - 47	64.8	102.7	149.8	0.69	5.201	0.17	0.3324	0.0037	0.1135	0.003	1851	28	1849	18	1850	48	100
YN-882 - 48	151.8	203	247.5	0.82	10.89	0.35	0.4689	0.0069	0.1679	0.0043	2513	30	2478	30	2535	43	99
YN-882 - 49	12.1	117	204.5	0.57	0.35	0.016	0.0493	0.0006	0.0512	0.0022	302.8	12	310.1	4	217	91	98
YN-882 - 50	181.9	54.6	458	0.12	5.586	0.17	0.3502	0.0037	0.1155	0.0028	1913.3	27	1935.1	17	1887	45	99
YN-882 - 51	151.6	70.1	389	0.18	5.405	0.17	0.3399	0.0038	0.1151	0.0028	1884.2	27	1886	18	1878	45	100
YN-882 - 52	102.8	99.6	162.5	0.61	11.08	0.35	0.4815	0.0053	0.1667	0.0041	2529.3	29	2533	23	2522	41	100
YN-882 - 53	58.4	59.3	136.3	0.44	5.585	0.18	0.3508	0.0039	0.1152	0.003	1913.2	27	1938	19	1878	46	99
YN-882 - 54	12.7	131.7	260	0.51	0.291	0.013	0.0415	0.0006	0.0512	0.0022	259.4	11	262.3	3.9	211	89	99
YN-882 - 55	10.8	139.1	131.9	1.05	0.473	0.025	0.0601	0.0009	0.0569	0.0027	389	17	377	5.4	413	100	97
YN-882 - 56	18.8	82.9	229.1	0.36	0.543	0.022	0.0718	0.0009	0.0548	0.002	438.8	15	447.1	5.1	377	80	98
YN-882 - 57	15.1	35.8	29.9	1.2	5.87	0.23	0.3537	0.005	0.1205	0.0041	1947	35	1951	24	1940	63	100
YN-882 - 58	40	99.9	527.8	0.19	0.5303	0.019	0.069	0.0008	0.0556	0.0016	432	12	430.2	4.6	423	64	100
YN-882 - 59	26.4	126.2	279.5	0.45	0.643	0.024	0.0802	0.001	0.0581	0.0019	502.8	15	497	5.7	508	73	99
YN-882 - 60	82.5	91.5	143.2	0.64	9.43	0.31	0.453	0.0057	0.1511	0.004	2379	30	2408	25	2354	46	99
YN-882 - 61	222.7	154.4	346.7	0.45	12.72	0.4	0.5025	0.0056	0.1832	0.0044	2658.7	29	2624	24	2680	40	99
YN-882 - 62	9.3	30.3	15.4	1.96	6.36	0.26	0.3653	0.0058	0.1264	0.0046	2014	37	2005	28	2015	67	100
YN-882 - 63	15	136.2	153.7	0.89	0.569	0.023	0.0742	0.0009	0.0554	0.002	456	15	461.3	5.6	412	80	99
YN-882 - 64	29.7	50.4	68.5	0.74	5.201	0.18	0.3327	0.0042	0.1136	0.0032	1851	30	1851	20	1847	51	100
YN-882 - 65	10.3	122.6	199.5	0.61	0.313	0.015	0.043	0.0006	0.053	0.0025	275.2	12	271.3	3.7	277	97	99
YN-882 - 66	98.4	159.2	226.9	0.7	5.288	0.17	0.3348	0.0036	0.1144	0.0028	1866.6	27	1861	17	1867	45	100
YN-882 - 67	32.8	231.5	169.8	1.36	1.229	0.046	0.1316	0.0015	0.0676	0.0022	811	21	796.9	8.7	836	66	98
YN-889 - 1	45.7	37.8	89.2	0.42	10.63	0.35	0.4513	0.011	0.1711	0.005	2488	31	2401	47	2563	50	96
YN-889 - 2	28.7	152	286.7	0.53	0.643	0.015	0.0795	0.0014	0.059	0.0014	504	9.4	493.1	8.5	535	52	98
YN-889 - 3	40.9	260.7	242.3	1.08	1.1	0.023	0.1224	0.0022	0.0648	0.0011	751	11	744.3	13	756	38	99
YN-889 - 4	114	51.8	284.9	0.18	5.674	0.065	0.3496	0.0061	0.1182	0.0012	1926.2	9.8	1933	29	1929	17	100
YN-889 - 5	58.4	289.4	420	0.69	0.956	0.014	0.1108	0.0019	0.0625	0.0008	680.5	7.1	677.6	11	688	29	100
YN-889 - 6	9.5	63.6	170	0.37	0.365	0.013	0.046	0.0009	0.0577	0.0022	314.3	9.7	289.7	5.3	456	81	92
YN-889 - 7	11.4	32.7	87.1	0.38	0.974	0.031	0.1124	0.0021	0.0628	0.002	690	16	686.7	12	666	69	100
YN-889 - 8	116.6	177.8	258.7	0.69	5.474	0.057	0.342	0.0058	0.116	0.001	1895	8.8	1897	29	1896	15	100
YN-889 - 9	36.6	193	224.5	0.86	1.133	0.024	0.1251	0.0024	0.0657	0.0013	767	11	759.7	13	772	44	99
YN-889 - 10	48.4	400.2	203.1	1.97	1.342	0.024	0.1441	0.0025	0.0675	0.0012	862	11	867.9	14	843	36	99
YN-889 - 11	15.4	66.9	85.9	0.78	1.27	0.036	0.1389	0.0026	0.066	0.0018	830	16	838	15	779	61	99
YN-889 - 12	215.5	182.6	319.9	0.57	13.28	0.12	0.5184	0.0093	0.1881	0.0013	2698.8	8.2	2692	39	2724	12	100
YN-889 - 13	56.3	165.2	145.2	1.14	3.752	0.048	0.2739	0.005	0.0998	0.0014	1583	11	1560	25	1612	25	99
YN-889 - 14	117.9	111.3	186.3	0.6	10.971	0.095	0.4794	0.0082	0.1653	0.0012	2519.5	8.1	2524	36	2510	13	100
YN-889 - 15	38.6	258.3	426.1	0.61	0.597	0.012	0.0753	0.0013	0.0576	0.0012	474.3	7.4	468.2	7.9	488	46	99
YN-889 - 16	30.4	90.9	187.6	0.48	1.238	0.023	0.1358	0.0024	0.066	0.0012	817	11	820.9	14	797	39	100
YN-889 - 17	41.1	487	437.9	1.11	0.52	0.015	0.07	0.0014	0.0547	0.0015	424	10	435.9	8.2	379	59	97
YN-889 - 18	22	152.5	255.1	0.6	0.547	0.014	0.0707	0.0013	0.0557	0.0013	442.3	9.3	440.5	7.6	416	54	100
YN-889 - 19	31.5	95.9	353.9	0.27	0.615	0.013	0.0784	0.0014	0.0567	0.0011	485.4	8.3	486.7	8.3	465	43	100
YN-889 - 20	21.2	103	127.2	0.81	1.182	0.027	0.1288	0.0024	0.0664	0.0015	789	12	780.7	13	792	47	99
YN-889 - 21	93.6	226.6	123.4	1.84	10.2	0.11	0.4612	0.0079	0.1599	0.0017	2451.3	9.6	2446	36	2451	18	100
YN-889 - 22	18.6	73.5	107.1	0.69	1.275	0.036	0.1381	0.0026	0.0669	0.0019	832	16	833.7	15	799	59	100
YN-889 - 23	38.2	258	357	0.72	0.698	0.014	0.0845	0.0015	0.0601	0.0012	537.4	8.3	522.8	9.2	589	43	97
YN-889 - 24	7.1	110.8	134.4	0.82	0.282	0.014	0.041	0.0008	0.05	0.0026	249	11	258.9	5.2	130	100	96
YN-889 - 25	36.3	90.5	319.2	0.28	0.835	0.018	0.0996	0.0018	0.0606	0.0012	614.4	9.8	612.1	11	604	42	100
YN-889 - 26	27.3	63.4	137.2	0.46	1.662	0.029	0.1663	0.0029	0.0722	0.0012	992	11	991.5	16	979	34	100
YN-889 - 27	16.7	242.5	378.2	0.64	0.2556	0.008	0.0359	0.0006	0.0516	0.0016	230.3	6.4	227.2	4	231	67	99
YN-889 - 28	8.8	59.3	180.8	0.33	0.301	0.012	0.0426	0.0008	0.051	0.002	265.8	9.2	268.9	5	206	81	99
YN-889 - 29	39.3	207.9	852	0.24	0.2876	0.0059	0.04	0.0007	0.0517	0.001	256.3	4.7	253	4.4	266	44	99
YN-889 - 30	101	575	440	1.31	1.567	0.019	0.1589	0.0027	0.0713	0.0008	956	7.5	950.7	15	957	24	99
YN-889 - 31	148.8	190.6	391.2	0.49	4.598	0.043	0.3075	0.0052	0.1082	0.0009	1747.7	7.8	1728	25	1765	15	99
YN-889 - 32	16.1	66.2	99.4	0.67	1.267	0.033	0.1357	0.0025	0.0677	0.0017	827	15	820.2	14	830	54	99
YN-889 - 33	167.9	124.7	446.2	0.28	5.055	0.04	0.3173	0.0053	0.1154	0.0009	1827.8	6.7	1776.5	26	1883	13	97
YN-889 - 34	44.9	90.3	221	0.41	1.758	0.029	0.1713	0.0031	0.0743	0.0011	1028	11	1018.8	17	1041	30	99
YN-889 - 35	25	200	503	0.4	0.305	0.0073	0.0426	0.0008	0.0518	0.0012	269.7	5.7	268.8	4.7	253	51	100
YN-889 - 36	99.7	64	531.6	0.12	1.68	0.022	0.1678	0.0029	0.0717	0.0009	1000	8.5	999.7	16	969	27	100
YN-889 - 37	33.1	96.6	129	0.75	2.231	0.043	0.1997	0.0034	0.0807	0.0015	1189	13	1173.5	18	1202	35	99
YN-889 - 38	31.8	115	247.9	0.46	0.937	0.024	0.1101	0.002	0.0624	0.0015	672	12	673.1	12	667	53	100
YN-889 - 39	75.5	344.4	647	0.53	0.772	0.016	0.0943	0.0017	0.0584	0.0011	579.7	9.1	580.8	9.8	532	43	100
YN-889 - 40	29.6	155.7	299.9	0.52	0.7	0.033	0.0772	0.0018	0.0644	0.0028	537	19	479.1	11	718	96	89
YN-889 - 41	49.4	108.6	113.1	0.96	4.741	0.066	0.3209	0.0056	0.1068	0.0014	1773	11	1795	27	1744	24	99
YN-889 - 42	44.7	265	498	0.53	0.574	0.01	0.0744	0.0014	0.056	0.001	460.1	6.5	462.4	8.2	434	38	100
YN-889 - 43	13.5	37.1	85.6	0.43	1.243	0.038	0.1351	0.0026	0.0667	0.0021	815	18	816.7	15	773	70	100
YN-889 - 44	56.7	383.2	642.3	0.6	0.56	0.011	0.0719	0.0013	0.0563	0.001	450.6	7.2	447.7	7.6	446	38	99
YN-889 - 45	5	72.7	84.8	0.86	0.339	0.02	0.0453	0.001	0.0544	0.0032	294	15	285.3	6.1	290	120	97
YN-889 - 46	14.3	54.7	88	0.62	1.246	0.039	0.1307	0.0025	0.0694	0.0022	818	17	791.9	14	866	65	97
YN-889 - 47	14.6	157	272	0.58	0.3161	0.0097	0.0444	0.0009	0.0516	0.0015	277.9	7.5	279.8	5.4	244	66	99
YN-889 - 48	7.5	380.7	622.5	0.61	0.0621	0.0029	0.0096	0.0002	0.0476	0.0022	61.4	2.8	61.2	1.3	47	92	100	polluted
YN-889 - 49	45.9	306.1	251.2	1.22	1.211	0.021	0.1313	0.0022	0.0668	0.0012	803.6	9.8	795.3	13	813	37	99
YN-889 - 50	9.3	50.8	53.5	0.95	1.186	0.038	0.1322	0.0027	0.0651	0.002	793	18	799.9	15	742	69	99
YN-889 - 51	16.5	170.2	281	0.61	0.358	0.011	0.0484	0.0009	0.0537	0.0018	309.2	8.3	304.8	5.4	311	70	99
YN-889 - 52	66.5	92.6	357.3	0.26	1.627	0.022	0.1642	0.0028	0.0717	0.001	979.3	8.5	980.2	16	967	27	100
YN-889 - 53	60	330.6	352.7	0.94	1.154	0.019	0.1273	0.0022	0.0656	0.0011	777.4	9.1	772.2	12	788	33	99
YN-889 - 54	24.6	99.3	139.5	0.71	1.277	0.028	0.1403	0.0025	0.0661	0.0016	834	13	846.1	14	786	50	99
YN-889 - 55	10.7	52	51	1.02	1.454	0.054	0.1505	0.0033	0.0705	0.0027	904	23	905	19	863	82	100
YN-889 - 56	11.1	45.9	112.4	0.41	0.688	0.025	0.0849	0.0016	0.0585	0.0022	527	15	525.4	9.7	492	81	100
YN-889 - 57	16.3	118.7	113.8	1.04	0.896	0.028	0.1051	0.0019	0.0618	0.002	645	15	644	11	624	68	100
YN-889 - 58	59.7	164.2	314.2	0.52	1.539	0.022	0.157	0.0027	0.0709	0.001	944.4	8.9	940	15	944	29	100
YN-889 - 59	28.9	193.7	374.1	0.52	0.492	0.011	0.0642	0.0011	0.0555	0.0012	406.1	7.2	401	6.8	419	46	99
YN-889 - 60	59.2	234.7	326	0.72	1.335	0.02	0.1452	0.0026	0.067	0.0009	861.9	9	873.6	15	827	28	99
YN-889 - 61	30.6	150.5	175.8	0.86	1.225	0.026	0.1344	0.0024	0.066	0.0014	809	12	813	13	780	46	100
YN-889 - 62	22.5	130.5	284	0.46	0.531	0.014	0.0713	0.0014	0.0543	0.0014	430.6	9.1	443.6	8.5	358	60	97
YN-889 - 63	38.5	89.2	154.9	0.58	2.223	0.037	0.2009	0.0035	0.0802	0.0014	1186	12	1179.8	19	1195	34	99
YN-889 - 64	16.6	94.8	175.7	0.54	0.608	0.016	0.0785	0.0014	0.056	0.0014	482	10	487.5	8.5	426	56	99
YN-889 - 65	19.5	136.4	171.8	0.79	0.721	0.019	0.0886	0.0016	0.0589	0.0015	549	11	547.2	9.3	528	57	100
YN-889 - 66	10.5	156.2	161.1	0.97	0.36	0.014	0.0488	0.001	0.0538	0.0021	314	11	307.4	6	337	84	98

## Sheet: Ages for gabbros and basalt
Sample No	Contents/ppm				Isotope Ratios						U-Pb Age/Ma						Concordance	Remark
	Pb	Th	U	Th/U	207Pb/235U	2σ	206Pb/238U	2σ	207Pb/206Pb	2σ	207Pb/235U	2σ	206Pb/238U	2σ	207Pb/206Pb	2σ
YN-854 - 1	17.1	363	251.7	1.44	0.334	0.01	0.0461	0.0008	0.0524	0.0016	291.6	7.6	290.7	5.2	266	65	100
YN-854 - 2	30.7	48.9	45.3	1.08	10.75	0.16	0.4804	0.0095	0.1642	0.0027	2500	13	2528	41	2491	27	99
YN-854 - 3	9.3	21.7	44.8	0.48	1.727	0.062	0.1741	0.0037	0.0719	0.0024	1011	23	1034	20	940	71	98
YN-854 - 4	42.8	396.7	940.5	0.42	0.2909	0.0058	0.0387	0.0007	0.0543	0.001	259.4	4.7	244.8	4.2	376	42	94
YN-854 - 5	402.2	0	8460	0	0.368	0.054	0.0459	0.0018	0.0599	0.0094	294	39	289	11	100	260	98
YN-854 - 6	19.1	129	222.8	0.58	0.543	0.014	0.0705	0.0012	0.0558	0.0014	438.7	9.1	439.3	7.4	412	56	100
YN-854 - 7	32.8	47	84.5	0.56	4.654	0.063	0.3128	0.0056	0.108	0.0014	1756	11	1754	27	1758	23	100
YN-854 - 8	14.1	100.8	244.3	0.41	0.362	0.011	0.0497	0.0009	0.0528	0.0017	313.2	8.2	312.9	5.5	278	70	100
YN-854 - 9	21.8	661	321.9	2.05	0.2896	0.009	0.0412	0.0008	0.051	0.0016	257.3	7.1	260.3	4.6	207	67	99
YN-854 - 10	92	95.5	127.1	0.75	13.59	0.14	0.5211	0.0092	0.187	0.0017	2720.3	9.6	2703	39	2713	15	99
YN-854 - 11	24.9	299.9	511	0.59	0.2887	0.0082	0.0405	0.0007	0.0515	0.0013	257.5	6.6	256.1	4.6	247	58	99
YN-854 - 12	7.6	98.7	107.6	0.92	0.439	0.014	0.0553	0.0011	0.0577	0.002	368	10	347.2	6.6	472	77	94
YN-854 - 13	44.1	258.4	486	0.53	0.58	0.01	0.0756	0.0013	0.0557	0.0009	463.8	6.5	470	8	423	37	99
YN-854 - 14	20.7	233	423.1	0.55	0.2709	0.0063	0.0392	0.0007	0.0501	0.0012	242.9	5.1	248.4	4.5	186	55	98
YN-854 - 15	42.8	317.8	522	0.61	0.522	0.01	0.0671	0.0012	0.0563	0.001	425.6	6.8	418.4	7	449	40	98
YN-854 - 16	6.7	78.1	132.3	0.59	0.291	0.015	0.0418	0.0008	0.0506	0.0027	258	12	263.9	5.1	160	110	98
YN-854 - 17	171.6	242.1	558.3	0.43	3.183	0.034	0.2538	0.0045	0.0905	0.001	1452.2	8.2	1458	23	1432	21	100
YN-854 - 18	31.4	348.6	759	0.46	0.2462	0.0053	0.035	0.0006	0.051	0.0011	223.1	4.3	221.4	3.9	222	46	99
YN-854 - 19	26.3	54.4	133.9	0.41	1.678	0.038	0.1676	0.003	0.0725	0.0016	996	14	998.9	16	973	46	100
YN-854 - 20	33.8	232.9	359.3	0.65	0.607	0.013	0.0771	0.0013	0.0571	0.0012	480.5	8.4	478.9	8	469	47	100
YN-854 - 21	34.9	136.9	325.6	0.42	0.751	0.015	0.0914	0.0016	0.0595	0.0012	567.3	8.6	563.8	9.4	568	43	99
YN-854 - 22	19.3	274	312.1	0.88	0.346	0.01	0.0474	0.0008	0.053	0.0015	300.6	7.5	298.3	5.2	291	62	99
YN-854 - 23	16.3	182.2	264.3	0.69	0.363	0.01	0.0494	0.0009	0.0533	0.0015	313.5	7.5	311.1	5.6	307	64	99
YN-854 - 24	19.4	435.6	245.6	1.77	0.368	0.011	0.0508	0.0009	0.0528	0.0016	317.2	8.2	319.1	5.7	283	65	99
YN-854 - 25	24.9	173.5	146.7	1.18	1.071	0.026	0.1217	0.0022	0.0641	0.0016	738	13	740.4	12	708	55	100
YN-854 - 26	7.8	59.6	69.8	0.85	0.713	0.028	0.0859	0.0017	0.0597	0.0023	541	17	531.1	10	539	87	98
YN-854 - 27	17.8	53.7	142.2	0.38	0.922	0.036	0.1043	0.0023	0.0624	0.0024	661	19	639.3	14	672	88	97
YN-854 - 28	13.7	240.2	208.7	1.15	0.34	0.012	0.046	0.0009	0.0536	0.002	295.6	9.2	290.2	5.4	304	79	98
YN-854 - 29	0.5	190	407	0.47	0.0074	0.0013	0.0012	0.0001	0.0479	0.0089	7.5	1.3	7.5	0.3	-220	290	99
YN-854 - 30	101.6	12.9	281.9	0.05	5.331	0.067	0.3338	0.0061	0.1174	0.0014	1873	11	1857	30	1914	21	99
YN-854 - 31	18.5	111.3	285	0.39	0.413	0.011	0.0562	0.001	0.0533	0.0014	350.2	7.8	352.3	6.2	309	58	99
YN-854 - 32	65.9	225.5	160.1	1.41	3.771	0.053	0.2795	0.0048	0.0978	0.0014	1584	11	1588.6	24	1575	26	100
YN-854 - 33	6.3	107.6	114.1	0.94	0.309	0.017	0.0403	0.0009	0.0549	0.0031	270	13	254.5	5.3	330	110	94
YN-854 - 34	14	122.6	320.9	0.38	0.2633	0.0089	0.0377	0.0007	0.0505	0.0016	237.2	7.3	238.5	4.4	196	69	99
YN-854 - 35	18	67.6	510.9	0.13	0.226	0.0063	0.0327	0.0006	0.0502	0.0014	206.4	5.2	207.3	3.9	182	58	100
YN-854 - 36	115.5	26.3	292	0.09	5.678	0.052	0.3506	0.006	0.1173	0.0009	1926.8	8	1937	29	1913	14	99
YN-854 - 37	12.1	199.1	266.2	0.75	0.2526	0.0096	0.0361	0.0007	0.0507	0.002	228.5	7.6	228.6	4.1	196	77	100
YN-855 - 1	37.4	75.8	249.6	0.3	1.088	0.03	0.1332	0.0022	0.0639	0.0014	747	15	805.7	13	724	46	92
YN-855 - 2	12.8	32.9	107.5	0.31	0.859	0.033	0.1045	0.0018	0.0644	0.0022	625	18	640.9	11	697	74	97
YN-855 - 3	56.6	226	360.6	0.63	1.123	0.029	0.1323	0.0022	0.0663	0.0012	763.5	14	800.9	12	804	40	95
YN-855 - 4	163.5	79.6	286.8	0.28	10.158	0.22	0.4653	0.0074	0.1704	0.002	2448.3	20	2462	32	2559.4	20	99
YN-855 - 5	124.5	210.7	343	0.61	3.888	0.089	0.296	0.0049	0.1024	0.0014	1610.8	19	1671	25	1665	26	96
YN-855 - 6	8.6	24.4	53.2	0.46	1.154	0.045	0.1367	0.0027	0.066	0.0024	775	22	825.6	15	768	78	94
YN-855 - 7	14	97.2	173.9	0.56	0.475	0.017	0.0668	0.0012	0.0552	0.0018	395	12	417	7.2	381	70	95
YN-855 - 8	190.4	622	2326	0.27	0.5175	0.012	0.0723	0.0012	0.0552	0.0008	423.3	8.1	449.9	6.9	418	32	94
YN-855 - 9	173.1	270	546	0.49	4.38	0.14	0.2534	0.0061	0.1316	0.002	1699	29	1454	32	2116	27	84
YN-855 - 10	26.4	327	612	0.53	0.305	0.016	0.0409	0.001	0.056	0.0027	270	13	258.4	6.1	420	110	96
YN-855 - 11	21.9	267.1	346.2	0.77	0.3599	0.012	0.0501	0.0009	0.054	0.0015	311.2	8.9	315.1	5.3	346	63	99
YN-855 - 12	13.3	72.3	106.1	0.68	0.93	0.033	0.101	0.0019	0.0657	0.002	664	17	620.2	11	749	66	93
YN-855 - 13	45.2	277.4	492.5	0.56	0.604	0.018	0.0745	0.0013	0.0574	0.0013	479.2	11	463.1	8	482	51	97
YN-855 - 14	37.8	294.6	505.3	0.58	0.5036	0.014	0.0627	0.001	0.0563	0.0012	413.4	9.3	391.7	6.2	444	47	95
YN-855 - 15	7.6	76.1	168	0.45	0.319	0.017	0.0392	0.001	0.057	0.0027	280	13	248.1	5.9	406	99	88
YN-855 - 16	15	242	364	0.66	0.283	0.012	0.0341	0.0006	0.0574	0.0022	251.5	9.1	215.9	3.6	454	83	85
YN-855 - 17	19.6	118.3	262.5	0.45	0.506	0.016	0.0638	0.001	0.0547	0.0015	414.1	11	398.6	6.4	368	62	96
YN-855 - 18	19.2	433.8	278.5	1.56	0.416	0.017	0.0443	0.0008	0.0645	0.0023	352	12	279.7	4.7	720	77	77	low concordance
YN-855 - 19	20.8	193.4	450.2	0.43	0.2881	0.0096	0.0383	0.0006	0.0517	0.0015	256.4	7.5	242	4	246	63	94
YN-855 - 20	71.5	252.1	983	0.26	0.597	0.017	0.0588	0.0013	0.0701	0.0016	475.1	10	368.5	8	910	47	75	Pb loss
YN-855 - 21	36.1	338	162.2	2.08	1.279	0.037	0.1327	0.0023	0.0661	0.0015	835	16	803.2	13	793	47	96
YN-855 - 22	82	93	209.9	0.44	5.238	0.12	0.321	0.0051	0.1117	0.0016	1857.2	20	1794.4	25	1822	26	97
YN-855 - 23	33.8	106.1	243.6	0.44	1.162	0.033	0.1199	0.0021	0.0665	0.0014	782	15	729.8	12	806	44	93
YN-855 - 24	52.9	395.5	669	0.59	0.5654	0.015	0.0685	0.0011	0.0567	0.0011	455.1	9.5	427.2	6.7	466	41	94
YN-855 - 25	70.8	89.3	190.5	0.47	4.485	0.11	0.2933	0.0048	0.1055	0.0017	1727	20	1658	24	1720	29	96
YN-855 - 26	2.3	222	184	1.21	0.0898	0.0088	0.0092	0.0003	0.0676	0.0069	86.8	8.2	58.9	1.8	730	200	62	low concordance
YN-855 - 27	49.5	425	874	0.49	0.597	0.019	0.0438	0.0011	0.0958	0.0029	473.8	12	276.1	6.7	1503	60	47	low concordance
YN-855 - 28	35.7	217.9	486.6	0.45	0.515	0.015	0.0628	0.001	0.057	0.0013	420.6	10	392.6	6.3	467	51	93
YN-855 - 29	14.6	148.2	190.5	0.78	0.465	0.018	0.0593	0.0011	0.0553	0.002	389	12	371.2	6.4	382	75	95
YN-855 - 30	100.6	948	1330	0.71	0.4938	0.012	0.0612	0.001	0.0567	0.0009	407.1	8.2	382.7	6	469	37	94
YN-855 - 31	17.5	307.6	317	0.97	0.3	0.014	0.042	0.0008	0.0505	0.0021	265	11	265.2	4.9	188	90	100
YN-855 - 32	12.8	168	251.2	0.67	0.296	0.015	0.042	0.0007	0.0499	0.0024	263	12	265.5	4.6	168	100	99
YN-855 - 33	5.4	186	157.6	1.18	0.168	0.011	0.0248	0.0005	0.0493	0.003	155.8	9.3	157.7	3.3	100	120	99
YN-855 - 34	46.8	677	428	1.58	0.539	0.015	0.071	0.0012	0.0557	0.0013	436.6	10	442.3	7.1	415	51	99
YN-859 - 1	20.1	93	113.1	0.82	1.289	0.04	0.1403	0.0028	0.0674	0.0022	837	18	846.2	16	819	68	99
YN-859 - 2	21.4	104.9	117.4	0.89	1.285	0.029	0.1397	0.0027	0.067	0.0016	837	13	843.1	15	836	46	99
YN-859 - 3	33.7	143.3	182.4	0.79	1.347	0.027	0.1426	0.0026	0.0681	0.0013	864	12	859.3	15	863	40	99
YN-859 - 4	23.4	106.3	129	0.82	1.326	0.036	0.1414	0.0028	0.0678	0.0016	853	15	852.4	16	832	50	100
YN-859 - 5	56	366.2	787	0.47	0.471	0.012	0.0624	0.0012	0.0559	0.0015	391.5	8.3	389.9	7.3	446	55	100
YN-859 - 6	21.7	156.2	251.6	0.62	0.532	0.014	0.0704	0.0013	0.0551	0.0014	432.2	9.3	438.7	7.9	393	57	99
YN-859 - 7	36.1	334	931	0.36	0.265	0.0049	0.036	0.0006	0.0532	0.001	238.4	3.9	227.8	4	325	42	95
YN-859 - 8	21.5	95.9	114.7	0.84	1.318	0.036	0.1405	0.0026	0.0675	0.0017	850	16	847.5	15	832	56	100
YN-859 - 9	35.6	81.1	220.6	0.37	1.345	0.037	0.1442	0.0029	0.0689	0.0019	864	16	868.1	16	881	56	100
YN-859 - 10	47.2	228.5	246.4	0.93	1.343	0.022	0.1424	0.0025	0.0683	0.0011	862.9	9.7	858.3	14	866	34	99
YN-859 - 11	22.6	88.7	128	0.69	1.32	0.031	0.1406	0.0025	0.0678	0.0016	851	14	848.2	14	850	47	100
YN-859 - 12	18.1	69.7	102.2	0.68	1.352	0.046	0.1445	0.0031	0.069	0.0024	865	20	870	18	871	74	99
YN-859 - 13	17.8	224.2	335.2	0.67	0.287	0.008	0.04	0.0007	0.0521	0.0015	255.5	6.3	252.9	4.4	263	62	99
YN-859 - 14	23.3	92	130.1	0.71	1.323	0.034	0.1452	0.0028	0.0672	0.0018	853	15	873.9	15	827	56	98
YN-859 - 15	43	230	221	1.04	1.315	0.024	0.1414	0.0025	0.0672	0.0012	850	10	852.6	14	834	38	100
YN-859 - 16	38	189	211	0.9	1.3	0.029	0.1397	0.0025	0.0678	0.0016	843	13	842.9	14	854	48	100
YN-859 - 17	38.4	160.9	202.5	0.79	1.391	0.031	0.1461	0.0028	0.0688	0.0013	882	13	879.8	16	872	41	100
YN-859 - 18	4.3	188.5	145.6	1.29	0.1326	0.0083	0.0206	0.0004	0.0473	0.003	126.4	7.6	131.1	2.8	40	130	96
YN-859 - 19	27.4	144	144	1	1.322	0.028	0.1402	0.0025	0.0683	0.0015	853	12	845.8	14	864	44	99
YN-859 - 20	21.5	94.7	115.5	0.82	1.333	0.031	0.1402	0.0026	0.0687	0.0015	857	13	845.9	14	868	46	99
YN-859 - 21	46.2	176.8	265	0.67	1.324	0.024	0.1402	0.0025	0.0685	0.0012	855	11	845.5	14	868	37	99
YN-859 - 22	27	122.2	140.8	0.87	1.297	0.027	0.1387	0.0025	0.0678	0.0014	842	12	837.2	14	842	45	99
YN-859 - 23	39.6	199.1	203.6	0.98	1.342	0.026	0.1422	0.0025	0.0679	0.0013	862	11	857.1	14	856	40	99
YN-859 - 24	22.9	115.8	126.6	0.91	1.288	0.029	0.1383	0.0025	0.0677	0.0016	837	13	835.1	14	837	48	100
YN-859 - 25	39.2	199.4	193.1	1.03	1.345	0.027	0.1425	0.0025	0.0684	0.0014	863	12	858.9	14	861	43	100
YN-859 - 26	21.2	113	225.1	0.5	0.627	0.017	0.0786	0.0014	0.058	0.0016	493	11	487.4	8.7	491	61	99
YN-859 - 27	41.9	252	211	1.19	1.398	0.033	0.1387	0.0026	0.0738	0.0016	886	14	837.1	15	1021	46	94
YN-859 - 28	20.6	114	246.5	0.46	0.553	0.014	0.0703	0.0013	0.0567	0.0014	445.3	9.4	438	7.6	453	56	98
YN-859 - 29	24.2	57.4	164	0.35	1.133	0.023	0.1272	0.0023	0.0647	0.0014	767	11	771.8	13	739	45	99
YN-859 - 30	17.2	65.4	113.3	0.58	1.31	0.074	0.1359	0.0035	0.0704	0.0038	846	33	821	20	910	110	97
YN-859 - 31	35.7	153	187.5	0.82	1.379	0.026	0.1451	0.0026	0.0689	0.0013	878	11	873.2	15	880	38	99
YN-859 - 32	5.6	52.9	106.2	0.5	0.34	0.017	0.0438	0.0009	0.0562	0.0028	294	13	276.2	5.5	370	110	94
YN-859 - 33	29.7	139.2	157.5	0.88	1.328	0.028	0.1412	0.0025	0.0682	0.0014	857	12	851.2	14	855	45	99
YN-859 - 34	9.7	106	145.6	0.73	0.377	0.013	0.052	0.001	0.0527	0.0019	324	9.9	326.7	6.4	276	78	99
YN-859 - 35	12.1	71.4	39.9	1.79	2.057	0.07	0.1911	0.0038	0.078	0.0026	1127	24	1127	21	1096	71	100
YN-859 - 36	31.2	147.2	166.2	0.89	1.352	0.028	0.143	0.0025	0.0683	0.0014	865	12	861.4	14	859	43	100
YN-859 - 37	24.3	121.1	275	0.44	0.557	0.013	0.0714	0.0012	0.0564	0.0013	448.2	8.3	444.6	7.5	441	50	99
YN-859 - 38	25.1	100.5	132.7	0.76	1.326	0.027	0.1429	0.0025	0.0674	0.0014	856	12	861	14	828	42	99
YN-859 - 39	20.8	77	115.4	0.67	1.351	0.034	0.1433	0.0026	0.0683	0.0018	865	15	863.4	15	847	55	100
YN-859 - 40	38.8	143	211.6	0.68	1.299	0.023	0.141	0.0025	0.0666	0.0011	843	10	850.4	14	817	37	99
YN-859 - 41	25.7	118.4	138.9	0.85	1.331	0.031	0.1406	0.0025	0.0683	0.0014	856	13	847.9	14	864	46	99
YN-859 - 42	22.3	298.3	382.2	0.78	0.3283	0.008	0.0455	0.0008	0.0522	0.0013	287.5	6.1	286.6	4.9	272	56	100
YN-859 - 43	48.5	361.6	406.6	0.89	0.735	0.019	0.0873	0.0016	0.06	0.0016	558	11	539.3	9.4	577	59	97
YN-859 - 44	8.9	141	177.8	0.79	0.276	0.012	0.0393	0.0008	0.0512	0.0022	245.9	9.4	248.2	4.7	199	89	99
YN-859 - 45	36.3	148.2	173.9	0.85	1.492	0.044	0.1536	0.0033	0.0689	0.002	924	18	921	18	873	63	100
YN-865 - 1	12.5	91.9	148.7	0.62	0.457	0.018	0.068	0.0012	0.054	0.002	381	13	423.7	7.1	319	78	89
YN-865 - 2	39.8	1050	630	1.67	0.2726	0.01	0.0408	0.0008	0.0529	0.0017	244.2	8	257.9	4.8	299	69	95
YN-865 - 3	15.9	156	309.1	0.5	0.2881	0.011	0.0432	0.0008	0.0525	0.0017	256.1	8.4	272.6	4.8	267	71	94
YN-865 - 4	59.6	113.6	726	0.16	0.5453	0.013	0.073	0.0012	0.0579	0.001	441.4	8.8	453.9	7.1	520	36	97
YN-865 - 5	26.4	284.9	487.9	0.58	0.301	0.012	0.0434	0.0008	0.0536	0.002	266.5	9.3	273.5	4.7	322	81	97
YN-865 - 6	29.9	278.2	624	0.45	0.3061	0.0092	0.044	0.0007	0.0529	0.0012	270.7	7.1	277.3	4.5	304	52	98
YN-865 - 7	15.5	138.5	245.3	0.56	0.478	0.021	0.0523	0.0011	0.069	0.0026	395	14	328.8	7	859	80	82	Pb loss
YN-865 - 8	10.1	75.2	224.4	0.34	0.3	0.012	0.0399	0.0007	0.0539	0.0021	267.5	9.6	252.4	4.4	327	80	94
YN-865 - 9	217.7	372.9	508.5	0.73	5.224	0.11	0.3307	0.0051	0.111	0.0014	1855.7	19	1841.6	25	1814	23	99
YN-865 - 10	50.2	397.5	559.7	0.71	0.577	0.017	0.0719	0.0012	0.0561	0.0013	462	11	447.6	7.3	437	52	97
YN-865 - 11	41	267.7	458.1	0.58	0.579	0.025	0.0723	0.0015	0.055	0.0021	463	16	450.3	9.3	396	85	97
YN-865 - 12	15.8	160.9	311.3	0.52	0.3115	0.011	0.0423	0.0007	0.0506	0.0015	274.4	8.6	267.1	4.4	199	65	97
YN-865 - 13	71.8	116.2	119.4	0.97	9.85	0.24	0.4257	0.007	0.1581	0.0023	2418	22	2286	32	2438	25	94	Pb loss
YN-865 - 14	2	211.6	207	1.02	0.0476	0.0046	0.0071	0.0002	0.0461	0.0043	47.4	4.5	45.7	1.2	-90	170	96
YN-865 - 15	53.8	271.5	327.4	0.83	1.168	0.035	0.1235	0.0021	0.0645	0.0016	784	16	750.6	12	741	52	96
YN-865 - 16	29.4	328	132.8	2.47	1.214	0.039	0.1243	0.0021	0.0665	0.0018	805	18	755.2	12	787	59	94
YN-865 - 17	19.8	162.6	74.7	2.18	1.636	0.061	0.1582	0.0028	0.0703	0.0023	984	24	946.4	15	901	68	96
YN-865 - 18	9.5	63.7	134.2	0.47	0.483	0.021	0.06	0.0011	0.0546	0.0023	397	15	375.9	6.9	335	91	95
YN-865 - 19	20	28	55.3	0.51	4.74	0.17	0.3041	0.0064	0.1049	0.0029	1769	30	1711	32	1709	48	97
YN-865 - 20	97.2	96.7	175.1	0.55	10.621	0.24	0.4347	0.007	0.1652	0.0022	2489.3	21	2326	32	2509	21	93	Pb loss
YN-865 - 21	14.4	7.8	130.4	0.06	0.924	0.034	0.1045	0.0019	0.0606	0.0021	664	18	640.9	11	593	72	96
YN-865 - 22	68.7	487	1023	0.48	0.6671	0.017	0.0537	0.001	0.085	0.002	518.3	10	337.3	6	1295	45	58	low concordance
YN-865 - 23	8.3	114.5	153.6	0.75	0.332	0.016	0.0428	0.0008	0.053	0.0023	290	12	270.3	4.7	274	95	93
YN-865 - 24	20.5	212.3	382.2	0.56	0.3304	0.011	0.044	0.0007	0.0517	0.0015	289	8.3	277.4	4.5	242	63	96
YN-865 - 25	20.8	187	225.7	0.83	0.587	0.021	0.0724	0.0012	0.0561	0.0018	467	13	450.7	7.4	415	68	96
YN-865 - 26	46.4	87.2	550	0.16	0.732	0.022	0.0785	0.0017	0.0648	0.0014	556.1	13	486.9	10	758	44	87
YN-865 - 27	148.4	527	328.7	1.6	4.558	0.11	0.2864	0.0051	0.1115	0.0015	1741	21	1623	25	1820	24	93
YN-865 - 28	49.6	350.2	1140	0.31	0.2868	0.0076	0.0384	0.0006	0.0528	0.001	255.7	6	242.9	3.9	303	43	95
YN-865 - 29	23.6	56.4	361	0.16	0.434	0.014	0.0596	0.0011	0.0541	0.0014	364.6	10	373.1	6.8	345	58	98
YN-865 - 30	82	82.5	143.4	0.58	9.61	0.22	0.4502	0.0071	0.1605	0.0022	2397.7	21	2396	32	2457	23	100
YN-865 - 31	41.8	631	890	0.71	0.2894	0.0081	0.0368	0.0006	0.0591	0.0013	257.7	6.4	233.2	3.9	554	49	90
YN-865 - 32	62.7	59	383.3	0.15	1.458	0.035	0.1523	0.0027	0.073	0.0013	912.1	14	913.8	15	1002	36	100
YN-865 - 33	127.6	167.4	442	0.38	3.114	0.078	0.2355	0.0041	0.1017	0.0016	1435	19	1365	20	1651	29	95
YN-865 - 34	55.3	120	193.2	0.62	2.787	0.072	0.2324	0.0042	0.0927	0.0016	1350	20	1347	22	1473	32	100
YN-865 - 35	5.1	78.1	95.1	0.82	0.272	0.016	0.0414	0.0009	0.051	0.0029	241	13	261.5	5.4	170	120	92
YN-865 - 36	7.9	153.6	157.6	0.97	0.255	0.025	0.0391	0.0011	0.0506	0.0051	230	20	247.2	7.1	180	220	93
YN-865 - 37	11.1	243.8	211.9	1.15	0.268	0.023	0.0391	0.001	0.0536	0.0047	240	18	247.1	6.3	290	180	97
YN-865 - 38	32.3	268.2	305	0.88	0.578	0.017	0.081	0.0013	0.0556	0.0013	461.8	11	502.3	8	413	53	92
YN-868 - 1	40.7	480	971	0.49	0.2575	0.0072	0.0378	0.0006	0.0521	0.0011	232.8	6	238.8	4	280	47	97
YN-868 - 2	5.7	603.6	659	0.92	0.0406	0.0025	0.0065	0.0001	0.0492	0.0029	40.3	2.4	41.6	0.8	90	120	97	conclusion
YN-868 - 3	9	95.6	38.4	2.49	1.116	0.054	0.1303	0.0027	0.0679	0.0031	751	26	789	15	775	97	95
YN-868 - 4	10	129.3	36.8	3.51	1.025	0.049	0.1302	0.0027	0.0634	0.0029	713	26	789	15	640	99	90
YN-868 - 5	27.6	69.3	153.1	0.45	1.415	0.047	0.1568	0.003	0.0718	0.0018	893	19	939	17	978	55	95
YN-868 - 6	98.3	369.5	611	0.6	1.068	0.026	0.1308	0.0022	0.0661	0.0011	736.8	13	792.3	12	801	34	93
YN-868 - 7	8	119.8	149.7	0.8	0.32	0.032	0.0453	0.0013	0.0565	0.0059	280	25	285.5	7.8	390	220	98
YN-868 - 8	57.2	443	976	0.45	0.3392	0.01	0.0503	0.0009	0.0548	0.0013	296.3	7.7	316.4	5.7	387	55	93
YN-868 - 9	33.3	163.9	201.5	0.81	1.055	0.029	0.1293	0.0022	0.0666	0.0015	729.8	14	783.9	12	820	44	93
YN-868 - 10	76.3	47.8	211.6	0.23	4.861	0.13	0.3343	0.0061	0.1175	0.0023	1794	22	1859	29	1913	35	96
YN-868 - 11	204.5	430	570	0.75	3.342	0.085	0.265	0.0046	0.1029	0.0017	1490	20	1515	23	1675	31	98
YN-868 - 12	25.6	514	431	1.19	0.291	0.016	0.0427	0.0009	0.0556	0.003	259	13	269.7	5.6	390	120	92
YN-868 - 13	18.4	303.5	317.3	0.96	0.2716	0.01	0.0429	0.0007	0.051	0.0017	243.1	8.1	270.8	4.7	214	71	90
YN-868 - 14	101.7	59.1	285.3	0.21	4.814	0.13	0.3335	0.0064	0.1146	0.0024	1786	23	1855	31	1870	37	96

## Sheet: Ages for basement
Sample No	Contents/ppm				Isotope Ratios						U-Pb Age/Ma						Concordance	Remark
	Pb	Th	U	Th/U	207Pb/235U	2σ	206Pb/238U	2σ	207Pb/206Pb	2σ	207Pb/235U	2σ	206Pb/238U	2σ	207Pb/206Pb	2σ
YN-851 - 1	23.8	157.3	124.4	1.26	1.237	0.041	0.1366	0.0018	0.0658	0.0022	817	19	825.4	10	785	74	99
YN-851 - 2	22.3	125.1	135.2	0.93	1.211	0.059	0.13	0.0026	0.0684	0.0034	803	27	788	15	851	110	98
YN-851 - 3	22.1	171.8	98.8	1.74	1.312	0.063	0.1362	0.0024	0.0695	0.0034	846	28	823	13	872	110	97
YN-851 - 4	14.4	107.5	74.6	1.44	1.288	0.064	0.1369	0.0025	0.0691	0.0035	836	29	827	14	860	110	99
YN-851 - 5	32.9	277.2	162	1.71	1.312	0.051	0.1364	0.0029	0.0703	0.0028	849	23	824	16	923	86	97
YN-851 - 6	36.4	335.6	171.4	1.96	1.267	0.048	0.1355	0.0021	0.0681	0.0027	829	21	819.2	12	853	83	98
YN-851 - 7	42.6	421	180.1	2.34	1.304	0.058	0.1371	0.0024	0.069	0.0031	845	26	828	14	877	94	97
YN-851 - 8	35.9	322	174.6	1.84	1.401	0.049	0.1238	0.0016	0.0814	0.0029	886	21	752.1	9.1	1197	73	84	low concordance
YN-851 - 9	42.9	396	187	2.12	1.366	0.07	0.1424	0.0024	0.0693	0.0033	871	29	858	13	885	96	98	narrow band (only the front 10 second)
YN-851 - 10	28.1	235.3	123.4	1.91	1.28	0.045	0.1362	0.0021	0.067	0.0024	836	20	823.1	12	806	80	99
YN-851 - 11	47.3	462	191.7	2.41	1.274	0.045	0.136	0.002	0.067	0.0023	832	20	821.6	12	819	73	99
YN-851 - 12	30.6	281	137.1	2.05	1.318	0.047	0.1372	0.0023	0.0693	0.0026	850	21	829	13	887	76	97
YN-851 - 13	26.4	268	140.5	1.91	1.267	0.053	0.1234	0.0019	0.0745	0.0032	829	24	749.9	11	1050	95	90
YN-851 - 14	17.8	138.7	79.1	1.75	1.307	0.063	0.138	0.0025	0.0671	0.0032	843	29	833	14	827	100	99
YN-851 - 15	21.6	148.9	103.1	1.44	1.273	0.047	0.1372	0.0021	0.0661	0.0024	830	21	828.4	12	791	80	100
YN-851 - 16	21	124	117.4	1.06	1.248	0.057	0.1384	0.0023	0.0655	0.0029	819	25	836	13	762	94	98
YN-851 - 17	37.1	311.5	172.8	1.8	1.491	0.05	0.1367	0.0021	0.0791	0.0027	924	21	825.9	12	1157	68	88
YN-851 - 18	24.2	176.8	111.8	1.58	1.325	0.053	0.1371	0.0023	0.0695	0.003	853	24	828	13	880	89	97
YN-851 - 19	77.3	712	305.4	2.33	1.665	0.059	0.1383	0.0021	0.0862	0.0031	991	22	835.1	12	1325	71	83	low concordance
YN-851 - 20	34.7	299.4	161.5	1.85	1.261	0.043	0.137	0.002	0.0669	0.0022	826	19	827.4	12	817	70	100
YN-851 - 21	17.1	128.2	80.1	1.6	1.341	0.049	0.1377	0.0018	0.0704	0.0026	862	21	832.4	10	907	77	97
YN-851 - 22	23.2	180	106.4	1.69	1.298	0.058	0.1373	0.0024	0.068	0.0031	841	25	829	14	835	94	99
YN-851 - 23	39.4	365.9	172.2	2.12	1.279	0.036	0.1374	0.0016	0.0674	0.002	834	16	829.6	8.9	827	64	99
YN-851 - 24	34.8	311.8	154.3	2.02	1.294	0.042	0.1415	0.002	0.0669	0.0023	841	19	852.8	11	817	74	99
YN-851 - 25	27.4	228.6	125.8	1.82	1.243	0.041	0.1366	0.0017	0.0663	0.0023	816	19	825.2	9.9	784	74	99
YN-851 - 26	15.4	90.6	74.8	1.21	1.305	0.071	0.1413	0.0026	0.067	0.0038	847	33	852	15	790	130	99
YN-851 - 27	8.5	57.7	41.6	1.39	1.3	0.09	0.1383	0.0034	0.0689	0.0051	837	39	835	19	810	150	100
YN-851 - 28	20.6	159.1	97.6	1.63	1.266	0.045	0.1373	0.0019	0.0671	0.0025	826	20	829.2	11	811	80	100
YN-851 - 29	29.2	227.3	139.3	1.63	1.251	0.037	0.1368	0.002	0.0671	0.0022	822	17	826.6	11	815	68	100
YN-851 - 30	27.8	222.5	134.8	1.65	1.237	0.045	0.1372	0.0018	0.0662	0.0025	814	20	828.7	10	780	81	99
YN-851 - 31	7.8	54.1	36.3	1.49	1.29	0.12	0.1375	0.0042	0.0673	0.0064	825	54	830	24	740	200	98
YN-851 - 32	18.6	122	89.4	1.36	1.312	0.059	0.1415	0.0026	0.067	0.003	847	26	853	15	817	99	99
YN-851 - 33	31.4	248.4	150	1.66	1.236	0.037	0.1365	0.0016	0.0662	0.0021	814	17	825	9.2	781	69	99
YN-851 - 34	25.7	192.3	125.1	1.54	1.226	0.04	0.1374	0.0018	0.0653	0.0023	809	18	829.6	10	753	73	98
YN-852 - 1	26	131.5	141.8	0.93	1.353	0.065	0.1422	0.0028	0.0692	0.0033	866	28	857.2	16	884	100	99
YN-852 - 2	59.9	373.4	480.2	0.78	0.972	0.045	0.1047	0.0026	0.0692	0.003	689	23	642	15	893	93	93	narrow band
YN-852 - 3	33.9	177.6	172	1.03	1.339	0.075	0.1427	0.0029	0.0673	0.0037	863	30	860	16	825	110	100
YN-852 - 4	46.8	184.3	251.7	0.73	1.404	0.066	0.1436	0.0029	0.07	0.0033	889	28	864.7	16	914	98	97
YN-852 - 5	39.5	167.4	216	0.78	1.381	0.059	0.1448	0.0026	0.0692	0.0029	880	26	871.7	15	888	87	99
YN-852 - 6	54.2	280	297	0.94	1.337	0.059	0.144	0.0029	0.0677	0.0029	860	25	867	16	846	89	99
YN-852 - 7	47.3	265	473	0.56	0.841	0.037	0.0828	0.0022	0.0733	0.003	617	20	512	13	1017	83	81	Pb loss
YN-852 - 8	18.2	87.5	95.2	0.92	1.435	0.066	0.1447	0.0029	0.0712	0.0032	905	26	870.9	16	952	91	96
YN-852 - 9	37.9	175	213	0.82	1.347	0.059	0.145	0.0029	0.0679	0.003	864	26	872.9	16	846	93	99
YN-852 - 10	25.9	101.5	143	0.71	1.324	0.064	0.1435	0.0029	0.0663	0.0033	854	28	864.6	16	792	110	99
YN-852 - 11	20.2	82.4	115.7	0.71	1.274	0.056	0.1391	0.0024	0.0661	0.0029	832	25	839.2	14	779	94	99
YN-852 - 12	62.1	266.3	327.4	0.81	1.321	0.069	0.1431	0.0033	0.0661	0.0035	853	31	862	18	795	110	99
YN-852 - 13	61.3	323	307	1.05	1.365	0.066	0.1425	0.0029	0.0685	0.0034	872	28	859	16	871	100	98
YN-852 - 14	21.9	85.7	117.8	0.73	1.378	0.066	0.1439	0.0028	0.0687	0.0034	876	28	866.4	16	870	100	99
YN-852 - 15	43.8	204.2	265	0.77	1.256	0.052	0.1336	0.0026	0.0683	0.0029	825	23	808.3	15	865	88	98
YN-852 - 16	38.8	146.8	206.9	0.71	1.329	0.054	0.1438	0.0025	0.067	0.0027	856	24	866.1	14	822	85	99
YN-852 - 17	28.4	121.6	170	0.72	1.295	0.074	0.1451	0.0036	0.0666	0.0036	840	32	873	20	802	110	96
YN-852 - 18	28.2	107.3	152.8	0.7	1.331	0.07	0.1416	0.0029	0.0672	0.0034	856	31	853	16	819	110	100
YN-852 - 19	24.6	88.2	138.3	0.64	1.343	0.058	0.1448	0.0026	0.067	0.0029	861	25	871.7	15	808	93	99
YN-852 - 20	36.9	154.8	202.1	0.77	1.32	0.056	0.145	0.0025	0.0661	0.0027	853	24	872.6	14	802	84	98
YN-852 - 21	30.1	130.6	155.2	0.84	1.367	0.089	0.1437	0.0034	0.0684	0.0043	872	39	865	19	893	110	99
YN-852 - 22	15.8	63.5	86.1	0.74	1.336	0.071	0.1442	0.003	0.0666	0.0036	862	29	871	18	810	110	99
YN-852 - 23	35.7	131	205.8	0.64	1.315	0.069	0.1432	0.0036	0.0666	0.0036	850	30	862	20	807	120	99
YN-852 - 24	39.7	141.4	216.5	0.65	1.328	0.06	0.1437	0.0029	0.0662	0.003	856	26	865.6	16	804	98	99
YN-852 - 25	22.6	91.6	119.5	0.77	1.319	0.081	0.1431	0.003	0.0662	0.0041	849	36	862	17	760	140	98
YN-852 - 26	12.7	49.8	68.1	0.73	1.322	0.073	0.1439	0.0031	0.0666	0.0038	849	32	866	18	761	120	98
YN-852 - 27	28.4	110.4	158.2	0.7	1.341	0.068	0.1438	0.0028	0.0675	0.0035	861	29	866	16	829	110	99
YN-852 - 28	59	367	358	1.03	1.216	0.051	0.1255	0.0023	0.071	0.0029	807	23	762.2	13	946	86	94
YN-852 - 29	24.7	106	133	0.8	1.348	0.057	0.1444	0.0026	0.0678	0.0029	864	24	869.2	15	847	89	99
YN-852 - 30	21.5	102.1	111.7	0.91	1.321	0.063	0.1445	0.0029	0.0662	0.0032	852	28	870	17	781	100	98
YN-852 - 31	57.7	287	331	0.87	1.343	0.064	0.1427	0.0032	0.0706	0.0033	863	27	860	18	938	94	100
YN-852 - 32	18.6	82.1	97.1	0.85	1.363	0.064	0.1443	0.0028	0.0683	0.0032	869	27	868.9	16	858	91	100
YN-852 - 33	25.8	107.6	137.9	0.78	1.389	0.068	0.1445	0.003	0.0697	0.0036	882	29	870	17	891	110	99
YN-852 - 34	17.9	82.6	96.9	0.85	1.294	0.058	0.1445	0.0028	0.0656	0.0029	843	27	869.8	16	785	100	97
YN-852 - 35	42.1	173.5	239.6	0.72	1.322	0.055	0.1447	0.0027	0.0677	0.0029	856	25	871	15	846	90	98
YN-860 - 1	3.9	25	21.5	1.16	1.159	0.083	0.128	0.0031	0.0667	0.0047	766	41	776	18	660	150	99
YN-860 - 2	10.2	34.5	54.4	0.63	1.504	0.066	0.1529	0.0029	0.0712	0.0026	923	27	916.9	16	897	78	99
YN-860 - 3	28.7	172.9	182.2	0.95	1.134	0.038	0.123	0.0021	0.0668	0.0016	767	18	747.5	12	803	51	97
YN-860 - 4	26.8	119.4	169.8	0.7	1.141	0.037	0.1251	0.0022	0.0661	0.0016	771	18	759.8	12	782	50	99
YN-860 - 5	17.8	118.6	106.2	1.12	1.11	0.042	0.1226	0.0023	0.0651	0.0019	756	20	745.4	13	747	65	99
YN-860 - 6	16.4	92.1	102.2	0.9	1.087	0.043	0.1207	0.0022	0.0652	0.002	742	21	734.3	13	733	66	99
YN-860 - 7	32.4	184.6	195.6	0.94	1.117	0.036	0.126	0.0021	0.0641	0.0014	759	18	764.9	12	723	46	99
YN-860 - 8	18.4	98.3	113.7	0.86	1.123	0.041	0.1241	0.0022	0.0653	0.0018	761	20	754.1	13	763	59	99
YN-860 - 9	25.8	147.6	161.8	0.91	1.067	0.038	0.1212	0.0021	0.0636	0.0017	734	19	737.1	12	694	57	100
YN-860 - 10	31.3	285.2	158.8	1.8	1.094	0.038	0.1241	0.0022	0.0636	0.0017	749	18	753.9	13	709	53	99
YN-860 - 11	15.1	140.6	87.4	1.61	1.002	0.046	0.1123	0.0025	0.0648	0.0026	704	24	686	14	719	86	97
YN-860 - 12	24.2	125.9	146.5	0.86	1.048	0.044	0.1202	0.0023	0.0654	0.0021	725	22	731.6	13	759	69	99
YN-860 - 13	6.9	45.8	40.9	1.12	1.066	0.055	0.1221	0.0025	0.0636	0.0029	735	26	742.4	15	655	97	99
YN-860 - 14	8.3	47.9	51.3	0.93	1.096	0.049	0.1227	0.0024	0.0643	0.0024	744	24	745.6	14	691	80	100
YN-860 - 15	48	341.3	290.4	1.18	1.127	0.034	0.1239	0.0021	0.0656	0.0012	764.7	16	753	12	786	37	98
YN-860 - 16	265.3	203.1	415.5	0.49	13.74	0.4	0.4865	0.0095	0.2035	0.0022	2728	28	2554	41	2852.4	17	93	Pb loss
YN-860 - 17	17.6	78.4	110.2	0.71	1.126	0.042	0.1264	0.0022	0.0644	0.0019	762	20	767.1	13	718	65	99
YN-860 - 18	11.8	62.1	71.9	0.86	1.106	0.047	0.125	0.0023	0.0639	0.0022	750	23	759.1	13	685	75	99
YN-860 - 19	10.9	69.5	63.9	1.09	1.113	0.052	0.1259	0.0026	0.0632	0.0023	754	25	764	15	676	83	99
YN-860 - 20	27.3	162.6	158.1	1.03	1.12	0.04	0.1253	0.0022	0.0643	0.0017	760	19	760.9	13	723	57	100
YN-860 - 21	41.5	368	224.9	1.64	1.085	0.042	0.1205	0.0024	0.0646	0.0019	744	21	733.3	14	752	61	99
YN-860 - 22	16.7	87.3	96	0.91	1.193	0.046	0.1299	0.0024	0.0663	0.002	794	21	786.9	14	780	63	99
YN-860 - 23	68.4	488.9	380.7	1.28	1.125	0.033	0.1243	0.0021	0.0655	0.001	766.4	16	755.1	12	780	33	99
YN-860 - 24	21.2	79	126.5	0.62	1.184	0.043	0.1301	0.0023	0.0656	0.0017	791	19	788.1	13	766	55	100
YN-860 - 25	12.7	64	76.4	0.84	1.112	0.047	0.1272	0.0023	0.0627	0.0021	755	22	772	13	660	75	98
YN-860 - 26	6.6	26.2	60.3	0.43	0.885	0.078	0.0973	0.0035	0.0664	0.0061	637	42	598	20	730	190	94
YN-860 - 27	17.5	97.4	106.9	0.91	1.115	0.043	0.1245	0.0022	0.0645	0.0018	756	20	756.1	13	727	64	100
YN-860 - 28	16.8	119.4	97.3	1.23	1.116	0.045	0.1244	0.0025	0.0644	0.002	758	22	756	14	724	67	100
YN-860 - 29	15	83.7	86.8	0.96	1.155	0.044	0.1269	0.0023	0.0657	0.002	775	21	769.8	13	761	62	99
YN-860 - 30	17.5	88.7	106.7	0.83	1.145	0.041	0.1247	0.0022	0.0666	0.0018	775	20	757.7	13	786	58	98
YN-860 - 31	40.4	180.1	254.7	0.71	1.135	0.036	0.1247	0.0021	0.0655	0.0012	769.4	17	757.4	12	784	39	98
YN-860 - 32	18.3	107.4	109.8	0.98	1.117	0.041	0.1232	0.0022	0.0652	0.0018	758	20	748.6	13	748	61	99
YN-860 - 33	11.9	67.3	69.4	0.97	1.141	0.046	0.1269	0.0024	0.0651	0.0021	770	22	770	13	732	69	100
YN-860 - 34	19.7	114	117.2	0.97	1.12	0.04	0.1234	0.0022	0.0654	0.0018	761	19	749.8	13	750	60	99
YN-860 - 35	34.5	252.5	186.4	1.35	1.033	0.035	0.1199	0.0022	0.0644	0.0015	719	17	729.8	13	728	51	99
YN-860 - 36	18.2	89.6	111.2	0.81	1.264	0.081	0.1322	0.0038	0.0687	0.0039	826	37	800	22	860	120	97
YN-860 - 37	38.7	185.2	236	0.78	1.133	0.035	0.1268	0.0021	0.0643	0.0012	767.7	17	769.4	12	735	42	100
YN-860 - 38	34.2	163.5	211.2	0.77	1.13	0.036	0.1246	0.0021	0.0654	0.0013	766	17	756.7	12	769	43	99
YN-860 - 39	17.3	92.7	104	0.89	1.139	0.045	0.1247	0.0023	0.0661	0.0021	769	22	757.2	13	766	66	98
YN-860 - 40	29.1	162.6	170.7	0.95	1.142	0.038	0.1255	0.0022	0.0655	0.0015	771	18	762	13	771	47	99
YN-860 - 41	17.6	94.7	99	0.96	1.16	0.045	0.1298	0.0023	0.0645	0.002	779	21	786.7	13	718	67	99
YN-860 - 42	17.7	105.5	107.8	0.98	1.203	0.06	0.125	0.0031	0.0691	0.003	799	28	759	18	868	96	95
YN-860 - 43	29	171.9	161.9	1.06	1.175	0.041	0.1279	0.0023	0.0658	0.0015	786	19	775.5	13	785	51	99
YN-860 - 44	29.4	211.2	159.7	1.32	1.12	0.039	0.1256	0.0022	0.0642	0.0016	763	19	762.8	12	736	52	100
YN-860 - 45	15.1	80	85.9	0.93	1.209	0.049	0.1288	0.0025	0.068	0.0022	801	23	780.6	14	815	72	97
YN-860 - 46	26	139	154	0.9	1.124	0.039	0.1265	0.0022	0.0641	0.0017	764	19	768	13	715	57	99
YN-860 - 47	11.1	64.2	65.7	0.98	1.111	0.048	0.1244	0.0024	0.0641	0.0023	752	23	755.7	14	691	77	100
YN-860 - 48	17.4	55.4	116.3	0.48	1.125	0.041	0.1241	0.0022	0.0653	0.0018	763	20	754.2	13	753	59	99
YN-860 - 49	34.3	117.5	227.3	0.52	1.103	0.037	0.1222	0.0021	0.0651	0.0016	753	18	743	12	759	51	99
YN-860 - 50	18.5	113.5	98.2	1.16	1.195	0.044	0.1291	0.0024	0.0662	0.0017	796	21	782.4	14	800	61	98
YN-860 - 51	18.4	101.4	109.1	0.93	1.135	0.042	0.1254	0.0023	0.0654	0.0019	768	19	761.4	13	757	58	99
YN-860 - 52	27.7	186.3	161.8	1.15	1.135	0.045	0.1265	0.0025	0.0641	0.0019	768	21	767.7	14	741	69	100
YN-860 - 53	15.9	112.8	88.6	1.27	1.13	0.045	0.1249	0.0023	0.0655	0.0022	763	22	758.3	13	736	72	99
YN-860 - 54	30.4	159.8	181	0.88	1.15	0.037	0.1261	0.0022	0.0657	0.0014	775	18	765.7	13	774	46	99
YN-860 - 55	16.8	96.1	95.9	1	1.15	0.046	0.1275	0.0023	0.0648	0.002	774	21	773.6	13	735	66	100
YN-860 - 56	19.8	105.1	117.8	0.89	1.141	0.043	0.1266	0.0022	0.0648	0.0019	769	21	768.2	13	742	61	100
YN-860 - 57	12.3	74.4	69.8	1.07	1.152	0.046	0.1269	0.0024	0.0656	0.0021	776	22	769.9	14	758	69	99
YN-860 - 58	23.1	116.6	138.2	0.84	1.131	0.042	0.1259	0.0023	0.0651	0.0018	766	21	764.5	13	754	57	100
YN-860 - 59	32.2	132.6	191.9	0.69	1.225	0.04	0.1323	0.0022	0.0669	0.0015	810	18	800.8	13	816	46	99
YN-860 - 60	28.7	124.5	170.2	0.73	1.202	0.04	0.1319	0.0023	0.0659	0.0016	799	19	798.9	13	773	52	100
YN-860 - 61	6.3	32	38	0.84	1.168	0.057	0.1264	0.0026	0.0672	0.0029	776	27	767	15	749	95	99
YN-860 - 62	13.9	109.7	74.3	1.48	1.127	0.045	0.125	0.0024	0.0657	0.0022	763	22	759.3	14	750	70	100
YN-860 - 63	14.1	72.4	83.8	0.86	1.128	0.045	0.1268	0.0023	0.0645	0.0022	763	22	769.6	13	708	74	99
YN-860 - 64	29.4	157.9	175.4	0.9	1.153	0.041	0.1258	0.0023	0.0658	0.0016	776	19	764	13	783	53	98
YN-860 - 65	13.5	73.4	81.1	0.9	1.112	0.044	0.1248	0.0023	0.0647	0.002	754	21	758.2	13	714	69	99
YN-860 - 66	20.3	100.1	127.8	0.78	1.14	0.04	0.1242	0.0023	0.0663	0.0017	771	19	754.5	13	804	56	98
YN-860 - 67	50.3	267	309	0.86	1.114	0.034	0.1236	0.0021	0.0653	0.0012	758.7	16	751.3	12	768	39	99
YN-860 - 68	31.9	178.2	188.9	0.94	1.143	0.036	0.1253	0.0022	0.0664	0.0014	774.4	17	761	12	798	44	98
YN-860 - 69	27	190.5	153.6	1.24	1.114	0.038	0.1236	0.0021	0.0655	0.0016	757	18	751.4	12	759	53	99
YN-860 - 70	27.2	140.3	167.8	0.84	1.112	0.036	0.1256	0.0021	0.0643	0.0014	760	17	762.4	12	732	46	100
YN-860 - 71	19.8	107.6	121.3	0.89	1.122	0.041	0.1234	0.0022	0.0659	0.0018	760	20	750	13	772	59	99
YN-860 - 72	54.6	433	293	1.48	1.137	0.051	0.1202	0.0024	0.0693	0.0026	769	24	731.7	14	888	77	95
YN-860 - 73	43.3	207.7	269.7	0.77	1.114	0.038	0.122	0.0022	0.0662	0.0016	758	18	741.9	12	794	50	98
YN-860 - 74	21.4	118.3	125.2	0.94	1.152	0.039	0.1285	0.0023	0.0654	0.0016	777	19	779	13	763	51	100
YN-860 - 75	24.3	156.6	147.8	1.06	1.163	0.051	0.1255	0.0029	0.067	0.0026	781	24	762	16	810	85	98
YN-860 - 76	20.9	116.7	126	0.93	1.155	0.04	0.1251	0.0022	0.0672	0.0017	776	19	759.5	13	814	53	98
YN-860 - 77	66.4	486	359.2	1.35	1.142	0.035	0.1256	0.0021	0.0661	0.0012	772.3	16	762.8	12	793	39	99
YN-860 - 78	34.1	180.2	207.3	0.87	1.11	0.036	0.1236	0.0021	0.0654	0.0014	756	17	751.2	12	763	47	99
YN-860 - 79	21.3	139.1	121.9	1.14	1.119	0.047	0.1235	0.0024	0.0663	0.0023	758	22	750.8	14	780	71	99

## Sheet: Major and trace elements
Sample （YN-）	Basalt															Gabbro
	859	861	864	866（2）	866（3）	867	879（1）	879（2）	879（3）	879（4）	879（5）	886（1）	886（2）	886（3）	893	854	855	865	866（1）
Major elements (wt.%)
SiO2	49.17	45.66	51	48.73	45.31	50.94	47.23	47.61	47.92	48.17	48.55	51.25	48.98	48.22	47.04	51.85	52.85	50.54	49.53
Al2O3	14.04	12.97	9.28	13.1	12.62	13.99	14.88	15.13	15.44	14.57	14.4	11.99	13.13	13.2	12.34	13.54	13.85	11.72	14.26
Fe2O3	3.97	3.09	4.78	6.49	5.43	6.01	3.76	3.77	3.05	3.68	3.87	3.81	5.78	4.74	4.68	3.97	4.66	3.31	4.95
FeO	9.5	7.94	7.41	8.5	9.07	8.71	10.2	9.89	9.92	9.61	9.61	10.72	10.29	12.38	9.18	7.11	6.96	6.9	8.07
MgO	5.32	7.75	4.56	4.9	4.73	3.93	5.45	5.4	4.87	4.74	5.49	6.81	5.19	5.41	4.62	6.91	4.87	8.05	5.05
CaO	9	12.13	8.6	6.27	7.35	7.03	7.06	7.09	7.35	8.49	6.91	9.53	8.52	5.85	7.16	9.08	8.36	11.97	9.25
Na2O	3.28	2.06	1.58	2.03	3.57	4.71	3.31	3.22	3.63	3.18	2.25	2.71	3.23	3.34	3.26	1.87	2.7	2.48	3.17
K2O	0.601	1.16	0.255	1.42	0.857	0.333	1.2	1.27	1.21	0.858	1.84	0.467	0.571	0.171	0.031	1.55	0.859	0.428	1.25
MnO	0.183	0.195	0.21	0.199	0.211	0.21	0.183	0.184	0.175	0.192	0.177	0.221	0.22	0.211	0.204	0.168	0.17	0.168	0.186
TiO2	2.29	2.12	2.65	3.11	2.95	3.16	3.24	3.16	3.36	3.32	3.07	2	2.62	2.67	2.16	1.71	2.11	1.91	2.61
P2O5	0.244	0.458	0.376	0.504	0.467	0.489	0.35	0.345	0.365	0.362	0.323	0.183	0.248	0.254	0.216	0.188	0.269	0.306	0.489
LOI	2.34	4.32	9.19	4.7	7.4	0.39	3.1	2.91	2.7	2.78	3.47	0.25	1.18	3.52	9.08	1.99	2.29	2.15	1.17
Total	99.938	99.853	99.891	99.953	99.965	99.902	99.963	99.979	99.99	99.952	99.96	99.941	99.959	99.966	99.971	99.936	99.948	99.932	99.985
Mg#	41.3151	55.6041	40.005	36.8162	36.7679	32.2451	41.0344	41.3374	40.095	38.8662	42.0617	45.5174	36.5358	36.0323	37.2718	52.6441	42.7613	58.4273	40.8768
FeOT/Mg	2.53195	1.42323	2.67325	3.05918	3.06554	3.74555	2.56147	2.52963	2.66324	2.8038	2.45537	2.13363	3.09634	3.16451	3	1.60347	2.38604	1.26832	2.57822
Trace elements (ppm)
Li	13.2	17.8	16.7	16.6	23.6	7.9	18.6	20	20.5	18	17.7	10.1	14.4	42.4	43.3	18.7	16.4	10.1	18
Be	0.761	1.21	0.218	0.488	0.709	1.1	0.866	0.778	1.07	1.34	1.08	0.677	0.797	1.08	0.87	0.63	0.821	0.825	1.25
Sc	31.4	32.1	17.3	27.7	28.8	30.9	31.6	31.5	31.2	31.3	28.2	44	36.7	39.2	36.2	29.2	30.3	46.9	22.6
V	321	269	175	298	306	323	325	328	325	337	310	322	375	377	292	228	264	276	304
Cr	95.7	205	60.7	80.6	81.5	84.8	77	78.7	84.3	75.4	108	61.6	21.2	18.6	30.3	279	17.3	105	15.5
Co	44.2	33.2	46.8	41.2	44	44.2	44.1	45.9	43.7	42	50.1	57.1	50	47.5	51.9	42.1	38.9	36.6	33.5
Ni	72.3	77.1	47.4	56.5	60.1	56.3	68	68.8	77.3	63.8	99.5	74.5	39.8	45	52.6	106	43.8	122	43.2
Cu	70.9	24.8	191	143	203	330	201	206	207	214	203	84.8	194	145	157	70.6	152	41.2	126
Zn	132	143	143	168	159	156	158	162	166	156	157	123	161	164	124	107	139	114	147
Ga	20.6	18.5	13.1	18.5	18.3	17.1	21.2	22.8	22.4	23.2	22.3	15.1	18.8	16.7	15.7	17.1	20.2	14.8	20.8
Rb	9.05	30.6	4.39	29.9	23.6	3.89	28.8	32.1	23.8	18	35.6	9.23	12.8	2.33	0.636	41.5	27.5	9	29.6
Sr	571	870	362	387	331	425	357	376	469	337	541	166	249	125	382	552	480	649	513
Y	29.1	28.3	26.6	28.7	28.7	29.8	34.3	35.1	35.8	34.3	31.1	25.8	33	34.1	24.8	20.1	27.8	23.9	30.3
Mo	0.786	0.402	0.236	1.53	0.921	0.434	0.632	0.739	1.13	0.832	0.74	0.6	1.77	0.431	0.221	0.432	0.345	0.277	2.04
Cd	0.152	0.219	0.132	0.097	0.123	0.16	0.135	0.105	0.156	0.155	0.173	0.084	0.296	0.129	0.118	0.106	0.143	0.146	0.192
In	0.086	0.083	0.047	0.08	0.078	0.09	0.088	0.083	0.087	0.086	0.085	0.079	0.089	0.098	0.073	0.058	0.063	0.069	0.079
Sb	0.144	0.17	0.319	0.587	0.259	0.11	0.063	0.081	0.055	0.1	0.063	0.548	0.109	1.54	8.33	2.12	1.65	0.535	0.466
Cs	0.868	1.57	0.202	1.14	2.92	0.252	3.27	3.84	1.89	2.07	1.16	1.36	0.845	0.343	0.573	1.49	1.95	0.246	1.06
Ba	255	467	123	524	193	87.9	281	308	603	206	717	147	189	73.1	51.1	580	249	178	500
La	21.3	30.7	15.5	22.3	22.9	23.5	32.9	34.7	37.4	32.3	32.5	15.9	21.6	19.4	17.2	17.8	27.1	29.9	49.9
Ce	47.8	64.6	37.2	51.8	51.1	54	69.8	70.2	76.5	75.3	69.3	38.2	48.6	46.2	39.4	40	57.2	55	92.8
Pr	6.29	8.8	4.91	6.74	6.7	7.23	9.09	9.3	10.2	9.73	9.63	5.1	6.37	6.12	5.65	4.91	7.68	7.12	11.5
Nd	28.6	38.6	23.5	31.8	31.2	35	42.3	42	46.2	44.9	42.9	23.1	28.6	29	24.2	21.5	31.7	32.4	47.3
Sm	6.33	7.27	4.82	7.05	6.46	7.21	8.39	8.77	9.35	9.16	8.58	4.99	6.22	6.67	5.31	4.79	7.26	6.38	8.56
Eu	2.2	2.33	2.07	2.3	2.55	2.64	2.78	2.82	2.94	2.67	2.65	1.44	2.24	2.21	1.77	1.65	2.26	2.01	2.72
Gd	4.98	5.86	4.37	5.55	5.27	5.83	7.11	7.42	7.52	7.43	6.63	4.43	5.58	6	4.39	4.17	5.61	5.37	6.99
Tb	0.986	1.13	0.847	1.06	1.05	1.13	1.33	1.33	1.29	1.4	1.27	0.843	1.11	1.19	0.896	0.729	1.04	0.956	1.28
Dy	5.58	5.15	5.1	5.48	5.37	5.62	6.61	6.96	6.83	6.89	6.41	4.59	5.99	6.63	4.56	3.93	5.74	4.68	5.95
Ho	1.05	0.956	0.987	1.01	0.959	1.1	1.23	1.24	1.19	1.27	1.12	0.951	1.14	1.23	0.916	0.722	1	0.899	1.12
Er	3.03	2.64	2.59	2.76	2.66	2.88	3.31	3.35	3.49	3.57	3.26	2.48	3.16	3.45	2.63	1.91	2.74	2.39	3.06
Tm	0.462	0.428	0.375	0.406	0.394	0.418	0.492	0.526	0.526	0.538	0.475	0.409	0.514	0.566	0.396	0.288	0.441	0.336	0.433
Yb	2.59	2.48	2.02	2.37	2.5	2.26	2.96	3.08	3.05	3.09	2.73	2.37	3.07	3.16	2.51	1.78	2.25	2.05	2.4
Lu	0.335	0.307	0.267	0.278	0.308	0.279	0.42	0.423	0.439	0.432	0.377	0.316	0.388	0.41	0.384	0.191	0.321	0.233	0.295
W	0.391	0.517	1.6	0.897	0.47	0.35	0.439	0.431	0.456	0.449	0.375	0.462	0.334	0.495	0.439	0.397	0.537	0.761	1.08
Re	0.002	<0.002	<0.002	0.003	<0.002	0.002	0.002	0.002	0.002	<0.002	0.003	<0.002	<0.002	<0.002	<0.002	<0.002	<0.002	<0.002	0.002
Tl	0.065	0.151	0.028	0.162	0.159	0.022	0.102	0.12	0.121	0.063	0.139	0.029	0.069	0.013	<0.002	0.135	0.097	0.029	0.119
Pb	3.7	4.53	2.75	2.53	3.82	2.04	1.35	1.3	1.37	2.06	4.85	1.55	3.35	1.27	2.56	3.66	5.7	5.2	5.5
Bi	0.035	0.062	0.072	0.027	0.038	0.036	0.026	0.011	0.029	0.021	0.03	0.015	0.038	0.043	0.028	0.031	0.035	0.044	0.052
Th	2.93	4.96	1.63	2.35	2.09	2.4	4.1	4.36	4.43	4.38	3.77	2.15	2.61	2.96	2.54	2.72	3.62	3.31	5.82
U	0.64	1.03	0.322	0.426	0.366	0.578	1.03	0.984	1.07	1	0.951	0.653	1.12	1.1	0.686	0.497	0.684	0.651	1.22
Nb	22.1	42.3	21	20.5	19.6	20.4	30	29	29.6	28.9	28.7	17	21.5	23	19.9	16.8	24.7	28.8	52.5
Ta	1.37	2.89	1.17	1.38	1.27	1.53	2.01	1.91	2.05	2.1	1.93	1.16	1.44	1.49	1.34	1.05	1.6	1.81	3.34
Zr	18.3	13	14.9	21.7	43.9	21.5	263	267	269	260	254	48	78.7	148	131	37.5	46.6	24.3	24
Hf	1.18	0.589	0.864	0.629	1.02	2.35	6.84	6.64	6.36	6.7	6.13	1.52	2.36	4.26	3.35	1.34	1.65	0.96	0.99
Nb/Y	0.75945	1.4947	0.789474	0.714286	0.682927	0.684564	0.874636	0.826211	0.826816	0.842566	0.92283	0.658915	0.651515	0.674487	0.802419	0.835821	0.888489	1.20502	1.73267
Zr/Ti	0.000779932	0.000585816	0.000509979	0.000664627	0.00137749	0.000677059	0.00786264	0.00820172	0.00778899	0.00760986	0.00798321	0.00239258	0.00296714	0.00534607	0.00551237	0.00214794	0.00215681	0.00124403	0.000908644

## Sheet: PlotDat4
Source sheet	Sheet3	0	0	200	0	0	0
Plot name	ProbDens1	2	0	300	0	3998	0
Plot Type	16	4	0	300	22
1st free col	9	6	0	200	22
Sigma Level	2	8	0	200	0
Absolute Errs	TRUE	10	0	ErrBox	ErrBox
Symbol Type	1	12	0	300	0
Inverse Plot	FALSE	14	0	400	0
Color Plot	TRUE	16	0	400	10
3D plot	FALSE	18	0	300	10
Linear	FALSE	20	0	300	0
Data Range	A1:B343	22	0	ErrBox	ErrBox
Filled Symbols	TRUE	24	0	400	0
ConcAge	FALSE	26	0	500	0
ConcSwap	TRUE	28	0	500	33
1st Symbol-row	1	30	0	400	33
		32	0	400	0
		34	0	ErrBox	ErrBox
		36	0	500	0
		38	0	600	0
		40	0	600	25
		42	0	500	25
		44	0	500	0
		46	0	ErrBox	ErrBox
		48	0	600	0
		50	0	700	0
		52	0	700	20
		54	0	600	20
		56	0	600	0
		58	0	ErrBox	ErrBox
		60	0	700	0
		62	0	800	0
		64	0	800	104
		66	0	700	104
		68	0	700	0
		70	0	ErrBox	ErrBox
		72	0	800	0
		74	0	900	0
		76	0	900	27
		78	0	800	27
		80	0	800	0
		82	0	ErrBox	ErrBox
		84	0	900	0
		86	0	1000	0
		88	0	1000	31
		90	0	900	31
		92	0	900	0
		94	0	ErrBox	ErrBox
		96	0	1000	0
		98	0	1100	0
		100	0	1100	4
		102	0	1000	4
		104	0	1000	0
		106	0	ErrBox	ErrBox
		108	0	1100	0
		110	0	1200	0
		112	0	1200	5
		114	0	1100	5
		116	0	1100	0
		118	0	ErrBox	ErrBox
		120	0	1200	0
		122	0	1300	0
		124	0	1300	3
		126	0	1200	3
		128	0	1200	0
		130	0	ErrBox	ErrBox
		132	0	1300	0
		134	0	1400	0
		136	0	1400	2
		138	0	1300	2
		140	0	1300	0
		142	0	ErrBox	ErrBox
		144	0	1400	0
		146	0	1500	0
		148	0	1500	2
		150	0	1400	2
		152	0	1400	0
		154	0	ErrBox	ErrBox
		156	0	1500	0
		158	0	1600	0
		160	0	1600	3
		162	0	1500	3
		164	0	1500	0
		166	0	ErrBox	ErrBox
		168	0	1600	0
		170	0	1700	0
		172	0	1700	2
		174	0	1600	2
		176	0	1600	0
		178	0	ErrBox	ErrBox
		180	0	1700	0
		182	0	1800	0
		184	0	1800	7
		186	0	1700	7
		188	0	1700	0
		190	0	ErrBox	ErrBox
		192	0	1800	0
		194	0	1900	0
		196	0	1900	16
		198	0	1800	16
		200	0	1800	0
		202	0	ErrBox	ErrBox
		204	0	1900	0
		206	0	2000	0
		208	0	2000	2
		210	0	1900	2
		212	0	1900	0
		214	0	ErrBox	ErrBox
		216	0	2100	0
		218	1.47826e-08	2200	0
		220	8.91988e-07	2200	2
		222	1.98151e-05	2100	2
		224	0.000162585	2100	0
		226	0.000505552	ErrBox	ErrBox
		228	0.000698531	2200	0
		230	0.000704014	2300	0
		232	0.000569484	2300	3
		234	0.000220064	2200	3
		236	3.28646e-05	2200	0
		238	4.95366e-06	ErrBox	ErrBox
		240	2.8761e-05	2300	0
		242	0.000137813	2400	0
		244	0.000349604	2400	1
		246	0.000486241	2300	1
		248	0.000506815	2300	0
		250	0.000779622	ErrBox	ErrBox
		252	0.00116132	2400	0
		254	0.00114488	2500	0
		256	0.000977869	2500	6
		258	0.000829007	2400	6
		260	0.000565764	2400	0
		262	0.000339992	ErrBox	ErrBox
		264	0.000503061	2500	0
		266	0.00118855	2600	0
		268	0.0018355	2600	8
		270	0.00171176	2500	8
		272	0.00126793	2500	0
		274	0.00126555	ErrBox	ErrBox
		276	0.00162899	2600	0
		278	0.00215583	2700	0
		280	0.00238316	2700	1
		282	0.00202208	2600	1
		284	0.00149188	2600	0
		286	0.00106803	ErrBox	ErrBox
		288	0.00078714	2700	0
		290	0.000589842	2800	0
		292	0.000371573	2800	1
		294	0.000247569	2700	1
		296	0.000343409	2700	0
		298	0.000620697	ErrBox	ErrBox
		300	0.00102315	2800	0
		302	0.00148215	2900	0
		304	0.0017478	2900	1
		306	0.00156682	2800	1
		308	0.0010475	2800	0
		310	0.000524324	ErrBox	ErrBox
		312	0.000194671	3100	0
		314	5.20774e-05	3200	0
		316	9.80024e-06	3200	1
		318	1.41886e-06	3100	1
		320	6.60313e-07	3100	0
		322	1.78657e-06	ErrBox	ErrBox
		324	5.12991e-06	3500	0
		326	1.2945e-05	3600	0
		328	2.86197e-05	3600	1
		330	5.54374e-05	3500	1
		332	9.40832e-05	3500	0
		334	0.000139892	ErrBox	ErrBox
		336	0.000182242
		338	0.000208006
		340	0.000208012
		342	0.00018228
		344	0.000140103
		346	9.50832e-05
		348	5.9554e-05
		350	4.39211e-05
		352	6.40807e-05
		354	0.000149284
		356	0.000318223
		358	0.000513519
		360	0.000603866
		362	0.000524964
		364	0.000356033
		366	0.000206836
		368	0.000125185
		370	0.000130198
		372	0.00023285
		374	0.000376862
		376	0.000444808
		378	0.000404521
		380	0.000343279
		382	0.000313631
		384	0.000280814
		386	0.000214091
		388	0.000131264
		390	6.59604e-05
		392	3.95103e-05
		394	7.13056e-05
		396	0.000192323
		398	0.000405938
		400	0.000620504
		402	0.000692702
		404	0.000592671
		406	0.000445602
		408	0.000365354
		410	0.000339257
		412	0.00030475
		414	0.000259077
		416	0.000260641
		418	0.000357255
		420	0.000531708
		422	0.000708346
		424	0.000816449
		426	0.000858331
		428	0.000915132
		430	0.00107719
		432	0.00135341
		434	0.00165987
		436	0.00191423
		438	0.00209749
		440	0.00220053
		442	0.00219133
		444	0.00209019
		446	0.00200151
		448	0.00199335
		450	0.00198963
		452	0.00185273
		454	0.00154907
		456	0.00118277
		458	0.000893162
		460	0.000760385
		462	0.000782233
		464	0.000891732
		466	0.000988913
		468	0.00098952
		470	0.000881593
		472	0.000734979
		474	0.000631245
		476	0.000588583
		478	0.000573477
		480	0.000568222
		482	0.000592136
		484	0.000655317
		486	0.000721726
		488	0.00073621
		490	0.000675635
		492	0.00055872
		494	0.000417675
		496	0.000278517
		498	0.00016121
		500	7.88127e-05
		502	3.22956e-05
		504	1.26763e-05
		506	1.02215e-05
		508	2.16618e-05
		510	5.16052e-05
		512	0.000109887
		514	0.000206906
		516	0.000348081
		518	0.000529088
		520	0.000733227
		522	0.000932073
		524	0.00109121
		526	0.00118215
		528	0.00119601
		530	0.00114871
		532	0.00107151
		534	0.000994732
		536	0.000939712
		538	0.000921266
		540	0.000948375
		542	0.00101517
		544	0.00109249
		546	0.00113706
		548	0.00111878
		550	0.00104361
		552	0.000949551
		554	0.000878674
		556	0.000851056
		558	0.00085983
		560	0.000883787
		562	0.000901517
		564	0.000897683
		566	0.000863961
		568	0.000801084
		570	0.000722836
		572	0.000655911
		574	0.000629241
		576	0.000655357
		578	0.00071712
		580	0.000774338
		582	0.000789109
		584	0.000749806
		586	0.000673661
		588	0.000589347
		590	0.000518472
		592	0.00046988
		594	0.000443554
		596	0.00043506
		598	0.000437975
		600	0.000447223
		602	0.000463281
		604	0.000492482
		606	0.000540798
		608	0.000605405
		610	0.000672234
		612	0.000723153
		614	0.000747663
		616	0.00074924
		618	0.00074051
		620	0.000731197
		622	0.000719696
		624	0.000695887
		626	0.000651896
		628	0.000589844
		630	0.000519848
		632	0.000452644
		634	0.000395063
		636	0.000350476
		638	0.000319851
		640	0.000300419
		642	0.000284532
		644	0.000262446
		646	0.000228379
		648	0.000184997
		650	0.000142656
		652	0.000114458
		654	0.00011144
		656	0.000140465
		658	0.000204457
		660	0.000303062
		662	0.000433059
		664	0.000589196
		666	0.000765428
		668	0.000955216
		670	0.00114919
		672	0.00133114
		674	0.00147655
		676	0.00155774
		678	0.00155475
		680	0.00146542
		682	0.00130694
		684	0.00110797
		686	0.000897033
		688	0.000695014
		690	0.000514248
		692	0.000361277
		694	0.000239227
		696	0.000148399
		698	8.62329e-05
		700	4.81111e-05
		702	2.91624e-05
		704	2.61428e-05
		706	3.82249e-05
		708	6.58971e-05
		710	0.000108314
		712	0.000160799
		714	0.00021524
		716	0.000264541
		718	0.000308932
		720	0.00035892
		722	0.000431314
		724	0.000540205
		726	0.000688722
		728	0.000867683
		730	0.00106179
		732	0.00125982
		734	0.00146309
		736	0.00168838
		738	0.00196427
		740	0.00232376
		742	0.00279576
		744	0.00339756
		746	0.00412813
		748	0.00496252
		750	0.0058497
		752	0.00671673
		754	0.00748049
		756	0.00806396
		758	0.00841133
		760	0.00849782
		762	0.00833251
		764	0.00795435
		766	0.007422
		768	0.00679927
		770	0.00614072
		772	0.00548322
		774	0.00484688
		776	0.00424288
		778	0.0036823
		780	0.00317976
		782	0.00275107
		784	0.00240744
		786	0.00215098
		788	0.00197369
		790	0.00185968
		792	0.00178873
		794	0.00173958
		796	0.00169273
		798	0.00163386
		800	0.00155706
		802	0.00146647
		804	0.00137479
		806	0.00129792
		808	0.00124825
		810	0.00122917
		812	0.00123337
		814	0.00124538
		816	0.00124702
		818	0.00122346
		820	0.00116785
		822	0.00108299
		824	0.000979563
		826	0.000871727
		828	0.000772036
		830	0.000687807
		832	0.000620387
		834	0.000566773
		836	0.000522385
		838	0.000483279
		840	0.000447249
		842	0.000414009
		844	0.000385228
		846	0.000364595
		848	0.000357562
		850	0.000370362
		852	0.000408082
		854	0.000472532
		856	0.000561082
		858	0.000667072
		860	0.000781608
		862	0.000895493
		864	0.00100027
		866	0.0010881
		868	0.0011512
		870	0.00118187
		872	0.00117382
		874	0.00112445
		876	0.00103712
		878	0.000922025
		880	0.000794961
		882	0.000673995
		884	0.000575188
		886	0.000508991
		888	0.0004785
		890	0.000480075
		892	0.000505874
		894	0.000547086
		896	0.000596737
		898	0.000650964
		900	0.000708648
		902	0.000769897
		904	0.000834319
		906	0.000899857
		908	0.000962531
		910	0.00101682
		912	0.00105651
		914	0.00107582
		916	0.00107073
		918	0.00104039
		920	0.000988158
		922	0.000921708
		924	0.000852075
		926	0.000791617
		928	0.000751432
		930	0.000738813
		932	0.000755367
		934	0.000796411
		936	0.000851942
		938	0.000909112
		940	0.000955389
		942	0.000981551
		944	0.000983315
		946	0.000961285
		948	0.00091963
		950	0.000864251
		952	0.000801396
		954	0.00073706
		956	0.000677063
		958	0.000627234
		960	0.000593237
		962	0.00057988
		964	0.000590045
		966	0.000623729
		968	0.00067769
		970	0.000745861
		972	0.000820497
		974	0.000893579
		976	0.000958034
		978	0.00100842
		980	0.00104108
		982	0.00105401
		984	0.0010467
		986	0.00101999
		988	0.000976082
		990	0.000918314
		992	0.000850816
		994	0.000777981
		996	0.000703922
		998	0.000632074
		1000	0.000565002
		1002	0.000504407
		1004	0.000451217
		1006	0.000405661
		1008	0.000367291
		1010	0.000334974
		1012	0.000307044
		1014	0.000281543
		1016	0.000256684
		1018	0.000231312
		1020	0.000205279
		1022	0.000179522
		1024	0.000155864
		1026	0.000136457
		1028	0.000123183
		1030	0.000117002
		1032	0.000117608
		1034	0.000123349
		1036	0.000131586
		1038	0.000139298
		1040	0.000143844
		1042	0.000143582
		1044	0.000138276
		1046	0.000129066
		1048	0.000118099
		1050	0.000107877
		1052	0.000100609
		1054	9.76398e-05
		1056	9.91978e-05
		1058	0.000104401
		1060	0.000111546
		1062	0.000118514
		1064	0.000123266
		1066	0.000124242
		1068	0.00012063
		1070	0.000112452
		1072	0.000100471
		1074	8.59557e-05
		1076	7.03822e-05
		1078	5.51487e-05
		1080	4.13483e-05
		1082	2.96719e-05
		1084	2.04062e-05
		1086	1.35122e-05
		1088	8.74237e-06
		1090	5.7952e-06
		1092	4.42221e-06
		1094	4.52112e-06
		1096	6.19144e-06
		1098	9.75157e-06
		1100	1.57186e-05
		1102	2.47116e-05
		1104	3.73418e-05
		1106	5.40245e-05
		1108	7.47934e-05
		1110	9.91438e-05
		1112	0.000125983
		1114	0.000153677
		1116	0.000180277
		1118	0.000203827
		1120	0.000222703
		1122	0.000235893
		1124	0.000243138
		1126	0.000244895
		1128	0.000242149
		1130	0.000236117
		1132	0.000227932
		1134	0.000218401
		1136	0.000207888
		1138	0.000196326
		1140	0.000183394
		1142	0.000168735
		1144	0.000152193
		1146	0.000133963
		1148	0.000114634
		1150	9.51071e-05
		1152	7.64393e-05
		1154	5.96422e-05
		1156	4.55437e-05
		1158	3.46962e-05
		1160	2.73745e-05
		1162	2.36367e-05
		1164	2.33993e-05
		1166	2.65273e-05
		1168	3.28893e-05
		1170	4.23797e-05
		1172	5.49102e-05
		1174	7.0398e-05
		1176	8.87093e-05
		1178	0.000109641
		1180	0.000132875
		1182	0.000157933
		1184	0.000184127
		1186	0.000210512
		1188	0.00023587
		1190	0.000258697
		1192	0.000277307
		1194	0.000289981
		1196	0.000295198
		1198	0.000291908
		1200	0.000279794
		1202	0.00025943
		1204	0.000232294
		1206	0.000200614
		1208	0.000167062
		1210	0.000134384
		1212	0.000105045
		1214	8.09827e-05
		1216	6.34924e-05
		1218	5.32506e-05
		1220	5.04091e-05
		1222	5.47008e-05
		1224	6.55049e-05
		1226	8.18561e-05
		1228	0.000102423
		1230	0.000125501
		1232	0.000149078
		1234	0.000170992
		1236	0.000189164
		1238	0.000201882
		1240	0.000208035
		1242	0.000207255
		1244	0.000199915
		1246	0.000187022
		1248	0.000169975
		1250	0.000150337
		1252	0.000129603
		1254	0.000109047
		1256	8.96377e-05
		1258	7.20282e-05
		1260	5.65879e-05
		1262	4.34612e-05
		1264	3.26134e-05
		1266	2.38984e-05
		1268	1.70939e-05
		1270	1.19386e-05
		1272	8.16091e-06
		1274	5.50256e-06
		1276	3.7365e-06
		1278	2.67989e-06
		1280	2.20191e-06
		1282	2.22425e-06
		1284	2.7328e-06
		1286	3.75113e-06
		1288	5.35162e-06
		1290	7.63794e-06
		1292	1.07304e-05
		1294	1.47471e-05
		1296	1.97809e-05
		1298	2.58745e-05
		1300	3.29937e-05
		1302	4.10141e-05
		1304	4.96956e-05
		1306	5.86927e-05
		1308	6.75668e-05
		1310	7.58165e-05
		1312	8.29233e-05
		1314	8.84039e-05
		1316	9.18646e-05
		1318	9.30481e-05
		1320	9.18646e-05
		1322	8.84039e-05
		1324	8.29233e-05
		1326	7.582e-05
		1328	6.75745e-05
		1330	5.87096e-05
		1332	4.97311e-05
		1334	4.10863e-05
		1336	3.31359e-05
		1338	2.61417e-05
		1340	2.02723e-05
		1342	1.5621e-05
		1344	1.22331e-05
		1346	1.01359e-05
		1348	9.36565e-06
		1350	9.98495e-06
		1352	1.20867e-05
		1354	1.57808e-05
		1356	2.11641e-05
		1358	2.82747e-05
		1360	3.70408e-05
		1362	4.72313e-05
		1364	5.84245e-05
		1366	7.00046e-05
		1368	8.11964e-05
		1370	9.11373e-05
		1372	9.89799e-05
		1374	0.000104007
		1376	0.000105736
		1378	0.000104003
		1380	9.89717e-05
		1382	9.11211e-05
		1384	8.11652e-05
		1386	6.99462e-05
		1388	5.83178e-05
		1390	4.70416e-05
		1392	3.67118e-05
		1394	2.77187e-05
		1396	2.0248e-05
		1398	1.43099e-05
		1400	9.78435e-06
		1402	6.47616e-06
		1404	4.15036e-06
		1406	2.58162e-06
		1408	1.57049e-06
		1410	9.57561e-07
		1412	6.27752e-07
		1414	5.09579e-07
		1416	5.72664e-07
		1418	8.25484e-07
		1420	1.31435e-06
		1422	2.12339e-06
		1424	3.37418e-06
		1426	5.22302e-06
		1428	7.85172e-06
		1430	1.14593e-05
		1432	1.62262e-05
		1434	2.22916e-05
		1436	2.97155e-05
		1438	3.84301e-05
		1440	4.82224e-05
		1442	5.87125e-05
		1444	6.93657e-05
		1446	7.9531e-05
		1448	8.85079e-05
		1450	9.5633e-05
		1452	0.000100374
		1454	0.000102418
		1456	0.000101728
		1458	9.85689e-05
		1460	9.34888e-05
		1462	8.72544e-05
		1464	8.0758e-05
		1466	7.49048e-05
		1468	7.0501e-05
		1470	6.81419e-05
		1472	6.81506e-05
		1474	7.05312e-05
		1476	7.49718e-05
		1478	8.08864e-05
		1480	8.74973e-05
		1482	9.39277e-05
		1484	9.93382e-05
		1486	0.000103037
		1488	0.000104579
		1490	0.000103839
		1492	0.000101023
		1494	9.66508e-05
		1496	9.14747e-05
		1498	8.63787e-05
		1500	8.22523e-05
		1502	7.98681e-05
		1504	7.97786e-05
		1506	8.22457e-05
		1508	8.72114e-05
		1510	9.43216e-05
		1512	0.00010297
		1514	0.000112398
		1516	0.000121791
		1518	0.000130385
		1520	0.000137552
		1522	0.000142851
		1524	0.000146055
		1526	0.000147132
		1528	0.000146197
		1530	0.000143463
		1532	0.000139176
		1534	0.000133576
		1536	0.000126863
		1538	0.000119206
		1540	0.000110746
		1542	0.000101626
		1544	9.20177e-05
		1546	8.2126e-05
		1548	7.22056e-05
		1550	6.25515e-05
		1552	5.34851e-05
		1554	4.53363e-05
		1556	3.84296e-05
		1558	3.30561e-05
		1560	2.94757e-05
		1562	2.78959e-05
		1564	2.846e-05
		1566	3.12288e-05
		1568	3.61653e-05
		1570	4.30953e-05
		1572	5.17144e-05
		1574	6.15714e-05
		1576	7.20971e-05
		1578	8.26344e-05
		1580	9.25167e-05
		1582	0.000101146
		1584	0.000108079
		1586	0.000113098
		1588	0.000116253
		1590	0.000117858
		1592	0.000118453
		1594	0.000118713
		1596	0.000119345
		1598	0.000120967
		1600	0.00012402
		1602	0.000128679
		1604	0.000134838
		1606	0.000142119
		1608	0.000149922
		1610	0.000157504
		1612	0.000164075
		1614	0.000168886
		1616	0.000171315
		1618	0.000170924
		1620	0.000167502
		1622	0.000161071
		1624	0.000151874
		1626	0.000140341
		1628	0.000127037
		1630	0.000112605
		1632	9.7707e-05
		1634	8.29651e-05
		1636	6.89186e-05
		1638	5.59915e-05
		1640	4.44748e-05
		1642	3.45329e-05
		1644	2.62023e-05
		1646	1.94235e-05
		1648	1.40636e-05
		1650	9.94392e-06
		1652	6.86467e-06
		1654	4.626e-06
		1656	3.04259e-06
		1658	1.95284e-06
		1660	1.22297e-06
		1662	7.47208e-07
		1664	4.45342e-07
		1666	2.62228e-07
		1668	1.53063e-07
		1670	9.07663e-08
		1672	6.37387e-08
		1674	5.95859e-08
		1676	7.57946e-08
		1678	1.14926e-07
		1680	1.86699e-07
		1682	3.05259e-07
		1684	4.93571e-07
		1686	7.76636e-07
		1688	1.1982e-06
		1690	1.81272e-06
		1692	2.6896e-06
		1694	3.91436e-06
		1696	5.58896e-06
		1698	7.84067e-06
		1700	1.07878e-05
		1702	1.45748e-05
		1704	1.93432e-05
		1706	2.52285e-05
		1708	3.23522e-05
		1710	4.08195e-05
		1712	5.06988e-05
		1714	6.20283e-05
		1716	7.48175e-05
		1718	8.90436e-05
		1720	0.000104658
		1722	0.000121595
		1724	0.000139773
		1726	0.000159103
		1728	0.000179481
		1730	0.000200789
		1732	0.000222876
		1734	0.000245543
		1736	0.000268527
		1738	0.000291485
		1740	0.000313984
		1742	0.000335502
		1744	0.000355443
		1746	0.000373166
		1748	0.000388018
		1750	0.000399385
		1752	0.000406741
		1754	0.00040969
		1756	0.000408012
		1758	0.000401679
		1760	0.000390867
		1762	0.000375947
		1764	0.000357459
		1766	0.000336072
		1768	0.000312537
		1770	0.000287633
		1772	0.000262115
		1774	0.000236671
		1776	0.000211886
		1778	0.00018822
		1780	0.000166
		1782	0.000145434
		1784	0.00012661
		1786	0.000109537
		1788	9.41646e-05
		1790	8.04053e-05
		1792	6.81517e-05
		1794	5.73012e-05
		1796	4.77597e-05
		1798	3.94355e-05
		1800	3.22564e-05
		1802	2.61591e-05
		1804	2.10932e-05
		1806	1.70148e-05
		1808	1.38975e-05
		1810	1.17344e-05
		1812	1.05468e-05
		1814	1.03884e-05
		1816	1.1359e-05
		1818	1.36038e-05
		1820	1.7336e-05
		1822	2.27869e-05
		1824	3.02518e-05
		1826	4.00354e-05
		1828	5.24411e-05
		1830	6.77619e-05
		1832	8.62531e-05
		1834	0.000108093
		1836	0.000133413
		1838	0.000162265
		1840	0.000194656
		1842	0.000230553
		1844	0.000269897
		1846	0.0003126
		1848	0.000358521
		1850	0.000407428
		1852	0.000458926
		1854	0.0005124
		1856	0.00056698
		1858	0.000621534
		1860	0.000674723
		1862	0.000725102
		1864	0.000771246
		1866	0.000811869
		1868	0.000845936
		1870	0.000872709
		1872	0.000891745
		1874	0.000902857
		1876	0.00090606
		1878	0.000901513
		1880	0.000889489
		1882	0.000870351
		1884	0.000844563
		1886	0.000812693
		1888	0.000775417
		1890	0.000733516
		1892	0.000687858
		1894	0.000639387
		1896	0.00058909
		1898	0.000537978
		1900	0.00048706
		1902	0.000437312
		1904	0.000389645
		1906	0.000344872
		1908	0.000303667
		1910	0.000266535
		1912	0.000233787
		1914	0.000205525
		1916	0.000181641
		1918	0.000161831
		1920	0.000145644
		1922	0.000132511
		1924	0.000121802
		1926	0.000112883
		1928	0.000105158
		1930	9.81257e-05
		1932	9.13856e-05
		1934	8.46701e-05
		1936	7.78382e-05
		1938	7.08758e-05
		1940	6.38563e-05
		1942	5.69302e-05
		1944	5.02871e-05
		1946	4.41526e-05
		1948	3.87255e-05
		1950	3.41979e-05
		1952	3.07131e-05
		1954	2.83754e-05
		1956	2.72477e-05
		1958	2.73376e-05
		1960	2.86072e-05
		1962	3.09772e-05
		1964	3.43262e-05
		1966	3.84924e-05
		1968	4.32767e-05
		1970	4.84536e-05
		1972	5.37758e-05
		1974	5.89838e-05
		1976	6.38174e-05
		1978	6.80295e-05
		1980	7.13995e-05
		1982	7.3747e-05
		1984	7.4943e-05
		1986	7.49181e-05
		1988	7.36667e-05
		1990	7.12459e-05
		1992	6.77701e-05
		1994	6.34013e-05
		1996	5.83339e-05
		1998	5.27882e-05
		2000	4.6981e-05
		2002	4.11222e-05
		2004	3.53997e-05
		2006	2.99704e-05
		2008	2.49549e-05
		2010	2.04356e-05
		2012	1.64584e-05
		2014	1.30364e-05
		2016	1.01554e-05
		2018	7.78046e-06
		2020	5.86251e-06
		2022	4.34441e-06
		2024	3.16626e-06
		2026	2.26951e-06
		2028	1.59988e-06
		2030	1.10921e-06
		2032	7.56321e-07
		2034	5.07188e-07
		2036	3.34504e-07
		2038	2.16972e-07
		2040	1.38412e-07
		2042	8.68388e-08
		2044	5.35825e-08
		2046	3.73643e-08
		2048	2.8046e-08
		2050	2.65158e-08
		2052	3.25877e-08
		2054	4.76809e-08
		2056	7.29417e-08
		2058	1.18932e-07
		2060	1.90502e-07
		2062	2.99764e-07
		2064	4.63381e-07
		2066	7.03683e-07
		2068	1.04977e-06
		2070	1.53848e-06
		2072	2.21497e-06
		2074	3.13273e-06
		2076	4.35269e-06
		2078	5.94117e-06
		2080	7.96645e-06
		2082	1.04939e-05
		2084	1.35796e-05
		2086	1.72631e-05
		2088	2.1559e-05
		2090	2.64495e-05
		2092	3.18777e-05
		2094	3.77428e-05
		2096	4.38996e-05
		2098	5.01611e-05
		2100	5.63056e-05
		2102	6.20892e-05
		2104	6.72604e-05
		2106	7.15785e-05
		2108	7.48315e-05
		2110	7.68539e-05
		2112	7.754e-05
		2114	7.68539e-05
		2116	7.48315e-05
		2118	7.15785e-05
		2120	6.72604e-05
		2122	6.20892e-05
		2124	5.63056e-05
		2126	5.01611e-05
		2128	4.38996e-05
		2130	3.77513e-05
		2132	3.18941e-05
		2134	2.64811e-05
		2136	2.16189e-05
		2138	1.73752e-05
		2140	1.37861e-05
		2142	1.08667e-05
		2144	8.62483e-06
		2146	7.0761e-06
		2148	6.25898e-06
		2150	6.24839e-06
		2152	7.16495e-06
		2154	9.17681e-06
		2156	1.24911e-05
		2158	1.73321e-05
		2160	2.39053e-05
		2162	3.23501e-05
		2164	4.26909e-05
		2166	5.47715e-05
		2168	6.82435e-05
		2170	8.25485e-05
		2172	9.69522e-05
		2174	0.000110613
		2176	0.000122682
		2178	0.000132413
		2180	0.000139262
		2182	0.00014298
		2184	0.000143613
		2186	0.000141501
		2188	0.000137203
		2190	0.000131399
		2192	0.000124788
		2194	0.000117994
		2196	0.000111501
		2198	0.00010563
		2200	0.000100548
		2202	9.62829e-05
		2204	9.27866e-05
		2206	8.9969e-05
		2208	8.77345e-05
		2210	8.60031e-05
		2212	8.47178e-05
		2214	8.38403e-05
		2216	8.33391e-05
		2218	8.31766e-05
		2220	8.32969e-05
		2222	8.36195e-05
		2224	8.40387e-05
		2226	8.44286e-05
		2228	8.46541e-05
		2230	8.45839e-05
		2232	8.41034e-05
		2234	8.31351e-05
		2236	8.16366e-05
		2238	7.96164e-05
		2240	7.71316e-05
		2242	7.42838e-05
		2244	7.12108e-05
		2246	6.80742e-05
		2248	6.50452e-05
		2250	6.22899e-05
		2252	5.99551e-05
		2254	5.81561e-05
		2256	5.69679e-05
		2258	5.64198e-05
		2260	5.64941e-05
		2262	5.71281e-05
		2264	5.82197e-05
		2266	5.96356e-05
		2268	6.12214e-05
		2270	6.28126e-05
		2272	6.42424e-05
		2274	6.53652e-05
		2276	6.6044e-05
		2278	6.61741e-05
		2280	6.56829e-05
		2282	6.4533e-05
		2284	6.2722e-05
		2286	6.02805e-05
		2288	5.72684e-05
		2290	5.37695e-05
		2292	4.98892e-05
		2294	4.57325e-05
		2296	4.14177e-05
		2298	3.70576e-05
		2300	3.27569e-05
		2302	2.86084e-05
		2304	2.46891e-05
		2306	2.10568e-05
		2308	1.77622e-05
		2310	1.48277e-05
		2312	1.22668e-05
		2314	1.00804e-05
		2316	8.26059e-06
		2318	6.79293e-06
		2320	5.65968e-06
		2322	4.84219e-06
		2324	4.32316e-06
		2326	4.0882e-06
		2328	4.12699e-06
		2330	4.43381e-06
		2332	5.00751e-06
		2334	5.85096e-06
		2336	6.97007e-06
		2338	8.37239e-06
		2340	1.00654e-05
		2342	1.20546e-05
		2344	1.43412e-05
		2346	1.69207e-05
		2348	1.97803e-05
		2350	2.29008e-05
		2352	2.62442e-05
		2354	2.97681e-05
		2356	3.34167e-05
		2358	3.71234e-05
		2360	4.08099e-05
		2362	4.43997e-05
		2364	4.78021e-05
		2366	5.09299e-05
		2368	5.36992e-05
		2370	5.60371e-05
		2372	5.78763e-05
		2374	5.91623e-05
		2376	5.98646e-05
		2378	5.99699e-05
		2380	5.94864e-05
		2382	5.84439e-05
		2384	5.68936e-05
		2386	5.49067e-05
		2388	5.2572e-05
		2390	4.9994e-05
		2392	4.72894e-05
		2394	4.45843e-05
		2396	4.20176e-05
		2398	3.9715e-05
		2400	3.78176e-05
		2402	3.64641e-05
		2404	3.57791e-05
		2406	3.58888e-05
		2408	3.69078e-05
		2410	3.89378e-05
		2412	4.20649e-05
		2414	4.63551e-05
		2416	5.18505e-05
		2418	5.85647e-05
		2420	6.64783e-05
		2422	7.55357e-05
		2424	8.56426e-05
		2426	9.66652e-05
		2428	0.000108432
		2430	0.000120741
		2432	0.000133354
		2434	0.000146025
		2436	0.000158497
		2438	0.000170521
		2440	0.000181865
		2442	0.000192337
		2444	0.000201776
		2446	0.00021008
		2448	0.000217199
		2450	0.000223148
		2452	0.00022797
		2454	0.000231776
		2456	0.000234687
		2458	0.000236856
		2460	0.00023844
		2462	0.000239582
		2464	0.000240409
		2466	0.00024103
		2468	0.000241516
		2470	0.000241911
		2472	0.000242238
		2474	0.000242503
		2476	0.0002427
		2478	0.000242829
		2480	0.000242905
		2482	0.000242963
		2484	0.000243064
		2486	0.000243301
		2488	0.000243791
		2490	0.000244677
		2492	0.000246113
		2494	0.000248258
		2496	0.000251258
		2498	0.000255237
		2500	0.000260284
		2502	0.000266437
		2504	0.000273682
		2506	0.000281939
		2508	0.000291071
		2510	0.000300877
		2512	0.000311105
		2514	0.000321461
		2516	0.000331623
		2518	0.000341255
		2520	0.000350027
		2522	0.000357625
		2524	0.000363785
		2526	0.000368274
		2528	0.000370929
		2530	0.000371654
		2532	0.000370412
		2534	0.000367243
		2536	0.000362235
		2538	0.000355528
		2540	0.000347299
		2542	0.000337749
		2544	0.000327091
		2546	0.000315537
		2548	0.000303288
		2550	0.000290525
		2552	0.000277413
		2554	0.000264081
		2556	0.000250641
		2558	0.000237176
		2560	0.000223763
		2562	0.000210453
		2564	0.000197294
		2566	0.000184332
		2568	0.00017161
		2570	0.000159176
		2572	0.000147088
		2574	0.000135399
		2576	0.00012417
		2578	0.000113465
		2580	0.000103345
		2582	9.3869e-05
		2584	8.50887e-05
		2586	7.70477e-05
		2588	6.97767e-05
		2590	6.33011e-05
		2592	5.76236e-05
		2594	5.27439e-05
		2596	4.86408e-05
		2598	4.52846e-05
		2600	4.2635e-05
		2602	4.06407e-05
		2604	3.92496e-05
		2606	3.83959e-05
		2608	3.80128e-05
		2610	3.80309e-05
		2612	3.83758e-05
		2614	3.8987e-05
		2616	3.97893e-05
		2618	4.07167e-05
		2620	4.17064e-05
		2622	4.26998e-05
		2624	4.36412e-05
		2626	4.44879e-05
		2628	4.51946e-05
		2630	4.57259e-05
		2632	4.60533e-05
		2634	4.61551e-05
		2636	4.60165e-05
		2638	4.56332e-05
		2640	4.49987e-05
		2642	4.41203e-05
		2644	4.30066e-05
		2646	4.16798e-05
		2648	4.01549e-05
		2650	3.84622e-05
		2652	3.66264e-05
		2654	3.46783e-05
		2656	3.26505e-05
		2658	3.05764e-05
		2660	2.84904e-05
		2662	2.64269e-05
		2664	2.44201e-05
		2666	2.25036e-05
		2668	2.07084e-05
		2670	1.90719e-05
		2672	1.76225e-05
		2674	1.63908e-05
		2676	1.54063e-05
		2678	1.46972e-05
		2680	1.429e-05
		2682	1.42088e-05
		2684	1.44749e-05
		2686	1.51052e-05
		2688	1.61118e-05
		2690	1.75001e-05
		2692	1.92677e-05
		2694	2.1403e-05
		2696	2.38839e-05
		2698	2.66773e-05
		2700	2.9738e-05
		2702	3.30091e-05
		2704	3.64225e-05
		2706	3.99e-05
		2708	4.33558e-05
		2710	4.66985e-05
		2712	4.98347e-05
		2714	5.26727e-05
		2716	5.51259e-05
		2718	5.71168e-05
		2720	5.85807e-05
		2722	5.94686e-05
		2724	5.97494e-05
		2726	5.94116e-05
		2728	5.84634e-05
		2730	5.69327e-05
		2732	5.48649e-05
		2734	5.23213e-05
		2736	4.9375e-05
		2738	4.61081e-05
		2740	4.26076e-05
		2742	3.89614e-05
		2744	3.52547e-05
		2746	3.15672e-05
		2748	2.79672e-05
		2750	2.45213e-05
		2752	2.12749e-05
		2754	1.82652e-05
		2756	1.55172e-05
		2758	1.30446e-05
		2760	1.08513e-05
		2762	8.93235e-06
		2764	7.27578e-06
		2766	5.86442e-06
		2768	4.68061e-06
		2770	3.69632e-06
		2772	2.88999e-06
		2774	2.23812e-06
		2776	1.71833e-06
		2778	1.31001e-06
		2780	9.94737e-07
		2782	7.56508e-07
		2784	5.81854e-07
		2786	4.59837e-07
		2788	3.81973e-07
		2790	3.42111e-07
		2792	3.36295e-07
		2794	3.62624e-07
		2796	4.21123e-07
		2798	5.13629e-07
		2800	6.43698e-07
		2802	8.16523e-07
		2804	1.03886e-06
		2806	1.31894e-06
		2808	1.66638e-06
		2810	2.09205e-06
		2812	2.60563e-06
		2814	3.22524e-06
		2816	3.96078e-06
		2818	4.82578e-06
		2820	5.83341e-06
		2822	6.99594e-06
		2824	8.32411e-06
		2826	9.8265e-06
		2828	1.15087e-05
		2830	1.33729e-05
		2832	1.54167e-05
		2834	1.7633e-05
		2836	2.00092e-05
		2838	2.25269e-05
		2840	2.51619e-05
		2842	2.78838e-05
		2844	3.0657e-05
		2846	3.34407e-05
		2848	3.61901e-05
		2850	3.88574e-05
		2852	4.13928e-05
		2854	4.37467e-05
		2856	4.58705e-05
		2858	4.7719e-05
		2860	4.92512e-05
		2862	5.04326e-05
		2864	5.12359e-05
		2866	5.16423e-05
		2868	5.16423e-05
		2870	5.12359e-05
		2872	5.04326e-05
		2874	4.92512e-05
		2876	4.7719e-05
		2878	4.58705e-05
		2880	4.37467e-05
		2882	4.13928e-05
		2884	3.88574e-05
		2886	3.61901e-05
		2888	3.34407e-05
		2890	3.0657e-05
		2892	2.78838e-05
		2894	2.51619e-05
		2896	2.25269e-05
		2898	2.00092e-05
		2900	1.7633e-05
		2902	1.54167e-05
		2904	1.33729e-05
		2906	1.15087e-05
		2908	9.8265e-06
		2910	8.32411e-06
		2912	6.99594e-06
		2914	5.83341e-06
		2916	4.82578e-06
		2918	3.96078e-06
		2920	3.22524e-06
		2922	2.60563e-06
		2924	2.08849e-06
		2926	1.66081e-06
		2928	1.31032e-06
		2930	1.02565e-06
		2932	7.96514e-07
		2934	6.13699e-07
		2936	4.69122e-07
		2938	3.55782e-07
		2940	2.67702e-07
		2942	1.99842e-07
		2944	1.4801e-07
		2946	1.08759e-07
		2948	7.92878e-08
		2950	5.73478e-08
		2952	4.11524e-08
		2954	2.92983e-08
		2956	2.06946e-08
		2958	1.45025e-08
		2960	1.00831e-08
		2962	6.9553e-09
		2964	4.75999e-09
		2966	3.23195e-09
		2968	0
		2970	0
		2972	0
		2974	0
		2976	0
		2978	0
		2980	0
		2982	0
		2984	0
		2986	0
		2988	0
		2990	0
		2992	0
		2994	0
		2996	0
		2998	0
		3000	0
		3002	0
		3004	0
		3006	0
		3008	0
		3010	0
		3012	0
		3014	0
		3016	0
		3018	0
		3020	0
		3022	3.70267e-09
		3024	5.65541e-09
		3026	8.55616e-09
		3028	1.28221e-08
		3030	1.9033e-08
		3032	2.79848e-08
		3034	4.0757e-08
		3036	5.87961e-08
		3038	8.40159e-08
		3040	1.18916e-07
		3042	1.66719e-07
		3044	2.31525e-07
		3046	3.18476e-07
		3048	4.33931e-07
		3050	5.85641e-07
		3052	7.82904e-07
		3054	1.0367e-06
		3056	1.35976e-06
		3058	1.7666e-06
		3060	2.27342e-06
		3062	2.89794e-06
		3064	3.65902e-06
		3066	4.57621e-06
		3068	5.66909e-06
		3070	6.95645e-06
		3072	8.45528e-06
		3074	1.01797e-05
		3076	1.21397e-05
		3078	1.43399e-05
		3080	1.67785e-05
		3082	1.94458e-05
		3084	2.23235e-05
		3086	2.53844e-05
		3088	2.85916e-05
		3090	3.18989e-05
		3092	3.52517e-05
		3094	3.85878e-05
		3096	4.18394e-05
		3098	4.49354e-05
		3100	4.78032e-05
		3102	5.03724e-05
		3104	5.25768e-05
		3106	5.43578e-05
		3108	5.56668e-05
		3110	5.64672e-05
		3112	5.67366e-05
		3114	5.64672e-05
		3116	5.56668e-05
		3118	5.43578e-05
		3120	5.25768e-05
		3122	5.03724e-05
		3124	4.78032e-05
		3126	4.49354e-05
		3128	4.18394e-05
		3130	3.85878e-05
		3132	3.52517e-05
		3134	3.18989e-05
		3136	2.85916e-05
		3138	2.53844e-05
		3140	2.23235e-05
		3142	1.94458e-05
		3144	1.67785e-05
		3146	1.43399e-05
		3148	1.21397e-05
		3150	1.01797e-05
		3152	8.45528e-06
		3154	6.95645e-06
		3156	5.66909e-06
		3158	4.57621e-06
		3160	3.65902e-06
		3162	2.89794e-06
		3164	2.27342e-06
		3166	1.7666e-06
		3168	1.35976e-06
		3170	1.0367e-06
		3172	7.82904e-07
		3174	5.85641e-07
		3176	4.33931e-07
		3178	3.18476e-07
		3180	2.31525e-07
		3182	1.66719e-07
		3184	1.18916e-07
		3186	8.40159e-08
		3188	5.87961e-08
		3190	4.0757e-08
		3192	2.79848e-08
		3194	1.9033e-08
		3196	1.28221e-08
		3198	8.55616e-09
		3200	5.65541e-09
		3202	3.70267e-09
		3204	0
		3206	0
		3208	0
		3210	0
		3212	0
		3214	0
		3216	0
		3218	0
		3220	0
		3222	0
		3224	0
		3226	0
		3228	0
		3230	0
		3232	0
		3234	0
		3236	0
		3238	0
		3240	0
		3242	0
		3244	0
		3246	0
		3248	0
		3250	0
		3252	0
		3254	0
		3256	0
		3258	0
		3260	0
		3262	0
		3264	0
		3266	0
		3268	0
		3270	0
		3272	0
		3274	0
		3276	0
		3278	0
		3280	0
		3282	0
		3284	0
		3286	0
		3288	0
		3290	0
		3292	0
		3294	0
		3296	0
		3298	0
		3300	0
		3302	0
		3304	0
		3306	0
		3308	0
		3310	0
		3312	0
		3314	0
		3316	0
		3318	0
		3320	0
		3322	0
		3324	0
		3326	0
		3328	0
		3330	0
		3332	0
		3334	0
		3336	0
		3338	0
		3340	0
		3342	0
		3344	0
		3346	0
		3348	0
		3350	0
		3352	0
		3354	0
		3356	0
		3358	0
		3360	0
		3362	0
		3364	0
		3366	0
		3368	0
		3370	0
		3372	0
		3374	0
		3376	0
		3378	0
		3380	0
		3382	0
		3384	0
		3386	0
		3388	0
		3390	0
		3392	0
		3394	0
		3396	0
		3398	0
		3400	0
		3402	0
		3404	0
		3406	0
		3408	0
		3410	0
		3412	0
		3414	0
		3416	0
		3418	0
		3420	0
		3422	0
		3424	0
		3426	0
		3428	0
		3430	0
		3432	0
		3434	0
		3436	0
		3438	0
		3440	0
		3442	0
		3444	0
		3446	0
		3448	0
		3450	0
		3452	0
		3454	0
		3456	0
		3458	0
		3460	3.06698e-09
		3462	4.2278e-09
		3464	5.79609e-09
		3466	7.90264e-09
		3468	1.07158e-08
		3470	1.4451e-08
		3472	1.93814e-08
		3474	2.58518e-08
		3476	3.42937e-08
		3478	4.52432e-08
		3480	5.93622e-08
		3482	7.74611e-08
		3484	1.00525e-07
		3486	1.29742e-07
		3488	1.66535e-07
		3490	2.12593e-07
		3492	2.69903e-07
		3494	3.40787e-07
		3496	4.27933e-07
		3498	5.34423e-07
		3500	6.63762e-07
		3502	8.19891e-07
		3504	1.0072e-06
		3506	1.23054e-06
		3508	1.49517e-06
		3510	1.80677e-06
		3512	2.17136e-06
		3514	2.59524e-06
		3516	3.0849e-06
		3518	3.64688e-06
		3520	4.28765e-06
		3522	5.01341e-06
		3524	5.82995e-06
		3526	6.74238e-06
		3528	7.75494e-06
		3530	8.87076e-06
		3532	1.00916e-05
		3534	1.14177e-05
		3536	1.28473e-05
		3538	1.43768e-05
		3540	1.60003e-05
		3542	1.77098e-05
		3544	1.94947e-05
		3546	2.1342e-05
		3548	2.32365e-05
		3550	2.51607e-05
		3552	2.70953e-05
		3554	2.90189e-05
		3556	3.0909e-05
		3558	3.2742e-05
		3560	3.4494e-05
		3562	3.61409e-05
		3564	3.76592e-05
		3566	3.90266e-05
		3568	4.02223e-05
		3570	4.12278e-05
		3572	4.20272e-05
		3574	4.26077e-05
		3576	4.29598e-05
		3578	4.30778e-05
		3580	4.29598e-05
		3582	4.26077e-05
		3584	4.20272e-05
		3586	4.12278e-05
		3588	4.02223e-05
		3590	3.90266e-05
		3592	3.76592e-05
		3594	3.61409e-05
		3596	3.4494e-05
		3598	3.2742e-05
		3600	3.0909e-05
		3602	2.90189e-05
		3604	2.70953e-05
		3606	2.51607e-05
		3608	2.32365e-05
		3610	2.1342e-05
		3612	1.94947e-05
		3614	1.77098e-05
		3616	1.60003e-05
		3618	1.43768e-05
		3620	1.28473e-05
		3622	1.14177e-05
		3624	1.00916e-05
		3626	8.87076e-06
		3628	7.75494e-06
		3630	6.74238e-06
		3632	5.82995e-06
		3634	5.01341e-06
		3636	4.28765e-06
		3638	3.64688e-06
		3640	3.0849e-06
		3642	2.59524e-06
		3644	2.17136e-06
		3646	1.80677e-06
		3648	1.49517e-06
		3650	1.23054e-06
		3652	1.0072e-06
		3654	8.19891e-07
		3656	6.63762e-07
		3658	5.34423e-07
		3660	4.27933e-07
		3662	3.40787e-07
		3664	2.69903e-07
		3666	2.12593e-07
		3668	1.66535e-07
		3670	1.29742e-07
		3672	1.00525e-07
		3674	7.74611e-08
		3676	5.93622e-08
		3678	4.52432e-08
		3680	3.42937e-08
		3682	2.58518e-08
		3684	1.93814e-08
		3686	1.4451e-08
		3688	1.07158e-08
		3690	7.90264e-09
		3692	5.79609e-09
		3694	4.2278e-09
		3696	3.06698e-09
		3698	0
		3700	0
		3702	0
		3704	0
		3706	0
		3708	0
		3710	0
		3712	0
		3714	0
		3716	0
		3718	0
		3720	0
		3722	0
		3724	0
		3726	0
		3728	0
		3730	0
		3732	0
		3734	0
		3736	0
		3738	0
		3740	0
		3742	0
		3744	0
		3746	0
		3748	0
		3750	0
		3752	0
		3754	0
		3756	0
		3758	0
		3760	0
		3762	0
		3764	0
		3766	0
		3768	0
		3770	0
		3772	0
		3774	0
		3776	0
		3778	0
		3780	0
		3782	0
		3784	0
		3786	0
		3788	0
		3790	0
		3792	0
		3794	0
		3796	0
		3798	0
		3800	0
		3802	0
		3804	0
		3806	0
		3808	0
		3810	0
		3812	0
		3814	0
		3816	0
		3818	0
		3820	0
		3822	0
		3824	0
		3826	0
		3828	0
		3830	0
		3832	0
		3834	0
		3836	0
		3838	0
		3840	0
		3842	0
		3844	0
		3846	0
		3848	0
		3850	0
		3852	0
		3854	0
		3856	0
		3858	0
		3860	0
		3862	0
		3864	0
		3866	0
		3868	0
		3870	0
		3872	0
		3874	0
		3876	0
		3878	0
		3880	0
		3882	0
		3884	0
		3886	0
		3888	0
		3890	0
		3892	0
		3894	0
		3896	0
		3898	0
		3900	0
		3902	0
		3904	0
		3906	0
		3908	0
		3910	0
		3912	0
		3914	0
		3916	0
		3918	0
		3920	0
		3922	0
		3924	0
		3926	0
		3928	0
		3930	0
		3932	0
		3934	0
		3936	0
		3938	0
		3940	0
		3942	0
		3944	0
		3946	0
		3948	0
		3950	0
		3952	0
		3954	0
		3956	0
		3958	0
		3960	0
		3962	0
		3964	0
		3966	0
		3968	0
		3970	0
		3972	0
		3974	0
		3976	0
		3978	0
		3980	0
		3982	0
		3984	0
		3986	0
		3988	0
		3990	0
		3992	0
		3994	0
		3996	0
		3998	0
[truncated: 1 more rows]

## Sheet: PlotDat5
Source sheet	Sheet3	0	0	200	0	0	0
Plot name	ProbDens2	2	0	300	0	3998	0
Plot Type	16	4	0	300	22
1st free col	9	6	0	200	22
Sigma Level	2	8	0	200	0
Absolute Errs	TRUE	10	0	ErrBox	ErrBox
Symbol Type	1	12	0	300	0
Inverse Plot	FALSE	14	0	400	0
Color Plot	TRUE	16	0	400	10
3D plot	FALSE	18	0	300	10
Linear	FALSE	20	0	300	0
Data Range	A1:B343	22	0	ErrBox	ErrBox
Filled Symbols	FALSE	24	0	400	0
ConcAge	FALSE	26	0	500	0
ConcSwap	TRUE	28	0	500	33
1st Symbol-row	1	30	0	400	33
		32	0	400	0
		34	0	ErrBox	ErrBox
		36	0	500	0
		38	0	600	0
		40	0	600	25
		42	0	500	25
		44	0	500	0
		46	0	ErrBox	ErrBox
		48	0	600	0
		50	0	700	0
		52	0	700	20
		54	0	600	20
		56	0	600	0
		58	0	ErrBox	ErrBox
		60	0	700	0
		62	0	800	0
		64	0	800	104
		66	0	700	104
		68	0	700	0
		70	0	ErrBox	ErrBox
		72	0	800	0
		74	0	900	0
		76	0	900	27
		78	0	800	27
		80	0	800	0
		82	0	ErrBox	ErrBox
		84	0	900	0
		86	0	1000	0
		88	0	1000	31
		90	0	900	31
		92	0	900	0
		94	0	ErrBox	ErrBox
		96	0	1000	0
		98	0	1100	0
		100	0	1100	4
		102	0	1000	4
		104	0	1000	0
		106	0	ErrBox	ErrBox
		108	0	1100	0
		110	0	1200	0
		112	0	1200	5
		114	0	1100	5
		116	0	1100	0
		118	0	ErrBox	ErrBox
		120	0	1200	0
		122	0	1300	0
		124	0	1300	3
		126	0	1200	3
		128	0	1200	0
		130	0	ErrBox	ErrBox
		132	0	1300	0
		134	0	1400	0
		136	0	1400	2
		138	0	1300	2
		140	0	1300	0
		142	0	ErrBox	ErrBox
		144	0	1400	0
		146	0	1500	0
		148	0	1500	2
		150	0	1400	2
		152	0	1400	0
		154	0	ErrBox	ErrBox
		156	0	1500	0
		158	0	1600	0
		160	0	1600	3
		162	0	1500	3
		164	0	1500	0
		166	0	ErrBox	ErrBox
		168	0	1600	0
		170	0	1700	0
		172	0	1700	2
		174	0	1600	2
		176	0	1600	0
		178	0	ErrBox	ErrBox
		180	0	1700	0
		182	0	1800	0
		184	0	1800	7
		186	0	1700	7
		188	0	1700	0
		190	0	ErrBox	ErrBox
		192	0	1800	0
		194	0	1900	0
		196	0	1900	16
		198	0	1800	16
		200	0	1800	0
		202	0	ErrBox	ErrBox
		204	0	1900	0
		206	0	2000	0
		208	0	2000	2
		210	0	1900	2
		212	0	1900	0
		214	0	ErrBox	ErrBox
		216	0	2100	0
		218	1.47826e-08	2200	0
		220	8.91988e-07	2200	2
		222	1.98151e-05	2100	2
		224	0.000162585	2100	0
		226	0.000505552	ErrBox	ErrBox
		228	0.000698531	2200	0
		230	0.000704014	2300	0
		232	0.000569484	2300	3
		234	0.000220064	2200	3
		236	3.28646e-05	2200	0
		238	4.95366e-06	ErrBox	ErrBox
		240	2.8761e-05	2300	0
		242	0.000137813	2400	0
		244	0.000349604	2400	1
		246	0.000486241	2300	1
		248	0.000506815	2300	0
		250	0.000779622	ErrBox	ErrBox
		252	0.00116132	2400	0
		254	0.00114488	2500	0
		256	0.000977869	2500	6
		258	0.000829007	2400	6
		260	0.000565764	2400	0
		262	0.000339992	ErrBox	ErrBox
		264	0.000503061	2500	0
		266	0.00118855	2600	0
		268	0.0018355	2600	8
		270	0.00171176	2500	8
		272	0.00126793	2500	0
		274	0.00126555	ErrBox	ErrBox
		276	0.00162899	2600	0
		278	0.00215583	2700	0
		280	0.00238316	2700	1
		282	0.00202208	2600	1
		284	0.00149188	2600	0
		286	0.00106803	ErrBox	ErrBox
		288	0.00078714	2700	0
		290	0.000589842	2800	0
		292	0.000371573	2800	1
		294	0.000247569	2700	1
		296	0.000343409	2700	0
		298	0.000620697	ErrBox	ErrBox
		300	0.00102315	2800	0
		302	0.00148215	2900	0
		304	0.0017478	2900	1
		306	0.00156682	2800	1
		308	0.0010475	2800	0
		310	0.000524324	ErrBox	ErrBox
		312	0.000194671	3100	0
		314	5.20774e-05	3200	0
		316	9.80024e-06	3200	1
		318	1.41886e-06	3100	1
		320	6.60313e-07	3100	0
		322	1.78657e-06	ErrBox	ErrBox
		324	5.12991e-06	3500	0
		326	1.2945e-05	3600	0
		328	2.86197e-05	3600	1
		330	5.54374e-05	3500	1
		332	9.40832e-05	3500	0
		334	0.000139892	ErrBox	ErrBox
		336	0.000182242
		338	0.000208006
		340	0.000208012
		342	0.00018228
		344	0.000140103
		346	9.50832e-05
		348	5.9554e-05
		350	4.39211e-05
		352	6.40807e-05
		354	0.000149284
		356	0.000318223
		358	0.000513519
		360	0.000603866
		362	0.000524964
		364	0.000356033
		366	0.000206836
		368	0.000125185
		370	0.000130198
		372	0.00023285
		374	0.000376862
		376	0.000444808
		378	0.000404521
		380	0.000343279
		382	0.000313631
		384	0.000280814
		386	0.000214091
		388	0.000131264
		390	6.59604e-05
		392	3.95103e-05
		394	7.13056e-05
		396	0.000192323
		398	0.000405938
		400	0.000620504
		402	0.000692702
		404	0.000592671
		406	0.000445602
		408	0.000365354
		410	0.000339257
		412	0.00030475
		414	0.000259077
		416	0.000260641
		418	0.000357255
		420	0.000531708
		422	0.000708346
		424	0.000816449
		426	0.000858331
		428	0.000915132
		430	0.00107719
		432	0.00135341
		434	0.00165987
		436	0.00191423
		438	0.00209749
		440	0.00220053
		442	0.00219133
		444	0.00209019
		446	0.00200151
		448	0.00199335
		450	0.00198963
		452	0.00185273
		454	0.00154907
		456	0.00118277
		458	0.000893162
		460	0.000760385
		462	0.000782233
		464	0.000891732
		466	0.000988913
		468	0.00098952
		470	0.000881593
		472	0.000734979
		474	0.000631245
		476	0.000588583
		478	0.000573477
		480	0.000568222
		482	0.000592136
		484	0.000655317
		486	0.000721726
		488	0.00073621
		490	0.000675635
		492	0.00055872
		494	0.000417675
		496	0.000278517
		498	0.00016121
		500	7.88127e-05
		502	3.22956e-05
		504	1.26763e-05
		506	1.02215e-05
		508	2.16618e-05
		510	5.16052e-05
		512	0.000109887
		514	0.000206906
		516	0.000348081
		518	0.000529088
		520	0.000733227
		522	0.000932073
		524	0.00109121
		526	0.00118215
		528	0.00119601
		530	0.00114871
		532	0.00107151
		534	0.000994732
		536	0.000939712
		538	0.000921266
		540	0.000948375
		542	0.00101517
		544	0.00109249
		546	0.00113706
		548	0.00111878
		550	0.00104361
		552	0.000949551
		554	0.000878674
		556	0.000851056
		558	0.00085983
		560	0.000883787
		562	0.000901517
		564	0.000897683
		566	0.000863961
		568	0.000801084
		570	0.000722836
		572	0.000655911
		574	0.000629241
		576	0.000655357
		578	0.00071712
		580	0.000774338
		582	0.000789109
		584	0.000749806
		586	0.000673661
		588	0.000589347
		590	0.000518472
		592	0.00046988
		594	0.000443554
		596	0.00043506
		598	0.000437975
		600	0.000447223
		602	0.000463281
		604	0.000492482
		606	0.000540798
		608	0.000605405
		610	0.000672234
		612	0.000723153
		614	0.000747663
		616	0.00074924
		618	0.00074051
		620	0.000731197
		622	0.000719696
		624	0.000695887
		626	0.000651896
		628	0.000589844
		630	0.000519848
		632	0.000452644
		634	0.000395063
		636	0.000350476
		638	0.000319851
		640	0.000300419
		642	0.000284532
		644	0.000262446
		646	0.000228379
		648	0.000184997
		650	0.000142656
		652	0.000114458
		654	0.00011144
		656	0.000140465
		658	0.000204457
		660	0.000303062
		662	0.000433059
		664	0.000589196
		666	0.000765428
		668	0.000955216
		670	0.00114919
		672	0.00133114
		674	0.00147655
		676	0.00155774
		678	0.00155475
		680	0.00146542
		682	0.00130694
		684	0.00110797
		686	0.000897033
		688	0.000695014
		690	0.000514248
		692	0.000361277
		694	0.000239227
		696	0.000148399
		698	8.62329e-05
		700	4.81111e-05
		702	2.91624e-05
		704	2.61428e-05
		706	3.82249e-05
		708	6.58971e-05
		710	0.000108314
		712	0.000160799
		714	0.00021524
		716	0.000264541
		718	0.000308932
		720	0.00035892
		722	0.000431314
		724	0.000540205
		726	0.000688722
		728	0.000867683
		730	0.00106179
		732	0.00125982
		734	0.00146309
		736	0.00168838
		738	0.00196427
		740	0.00232376
		742	0.00279576
		744	0.00339756
		746	0.00412813
		748	0.00496252
		750	0.0058497
		752	0.00671673
		754	0.00748049
		756	0.00806396
		758	0.00841133
		760	0.00849782
		762	0.00833251
		764	0.00795435
		766	0.007422
		768	0.00679927
		770	0.00614072
		772	0.00548322
		774	0.00484688
		776	0.00424288
		778	0.0036823
		780	0.00317976
		782	0.00275107
		784	0.00240744
		786	0.00215098
		788	0.00197369
		790	0.00185968
		792	0.00178873
		794	0.00173958
		796	0.00169273
		798	0.00163386
		800	0.00155706
		802	0.00146647
		804	0.00137479
		806	0.00129792
		808	0.00124825
		810	0.00122917
		812	0.00123337
		814	0.00124538
		816	0.00124702
		818	0.00122346
		820	0.00116785
		822	0.00108299
		824	0.000979563
		826	0.000871727
		828	0.000772036
		830	0.000687807
		832	0.000620387
		834	0.000566773
		836	0.000522385
		838	0.000483279
		840	0.000447249
		842	0.000414009
		844	0.000385228
		846	0.000364595
		848	0.000357562
		850	0.000370362
		852	0.000408082
		854	0.000472532
		856	0.000561082
		858	0.000667072
		860	0.000781608
		862	0.000895493
		864	0.00100027
		866	0.0010881
		868	0.0011512
		870	0.00118187
		872	0.00117382
		874	0.00112445
		876	0.00103712
		878	0.000922025
		880	0.000794961
		882	0.000673995
		884	0.000575188
		886	0.000508991
		888	0.0004785
		890	0.000480075
		892	0.000505874
		894	0.000547086
		896	0.000596737
		898	0.000650964
		900	0.000708648
		902	0.000769897
		904	0.000834319
		906	0.000899857
		908	0.000962531
		910	0.00101682
		912	0.00105651
		914	0.00107582
		916	0.00107073
		918	0.00104039
		920	0.000988158
		922	0.000921708
		924	0.000852075
		926	0.000791617
		928	0.000751432
		930	0.000738813
		932	0.000755367
		934	0.000796411
		936	0.000851942
		938	0.000909112
		940	0.000955389
		942	0.000981551
		944	0.000983315
		946	0.000961285
		948	0.00091963
		950	0.000864251
		952	0.000801396
		954	0.00073706
		956	0.000677063
		958	0.000627234
		960	0.000593237
		962	0.00057988
		964	0.000590045
		966	0.000623729
		968	0.00067769
		970	0.000745861
		972	0.000820497
		974	0.000893579
		976	0.000958034
		978	0.00100842
		980	0.00104108
		982	0.00105401
		984	0.0010467
		986	0.00101999
		988	0.000976082
		990	0.000918314
		992	0.000850816
		994	0.000777981
		996	0.000703922
		998	0.000632074
		1000	0.000565002
		1002	0.000504407
		1004	0.000451217
		1006	0.000405661
		1008	0.000367291
		1010	0.000334974
		1012	0.000307044
		1014	0.000281543
		1016	0.000256684
		1018	0.000231312
		1020	0.000205279
		1022	0.000179522
		1024	0.000155864
		1026	0.000136457
		1028	0.000123183
		1030	0.000117002
		1032	0.000117608
		1034	0.000123349
		1036	0.000131586
		1038	0.000139298
		1040	0.000143844
		1042	0.000143582
		1044	0.000138276
		1046	0.000129066
		1048	0.000118099
		1050	0.000107877
		1052	0.000100609
		1054	9.76398e-05
		1056	9.91978e-05
		1058	0.000104401
		1060	0.000111546
		1062	0.000118514
		1064	0.000123266
		1066	0.000124242
		1068	0.00012063
		1070	0.000112452
		1072	0.000100471
		1074	8.59557e-05
		1076	7.03822e-05
		1078	5.51487e-05
		1080	4.13483e-05
		1082	2.96719e-05
		1084	2.04062e-05
		1086	1.35122e-05
		1088	8.74237e-06
		1090	5.7952e-06
		1092	4.42221e-06
		1094	4.52112e-06
		1096	6.19144e-06
		1098	9.75157e-06
		1100	1.57186e-05
		1102	2.47116e-05
		1104	3.73418e-05
		1106	5.40245e-05
		1108	7.47934e-05
		1110	9.91438e-05
		1112	0.000125983
		1114	0.000153677
		1116	0.000180277
		1118	0.000203827
		1120	0.000222703
		1122	0.000235893
		1124	0.000243138
		1126	0.000244895
		1128	0.000242149
		1130	0.000236117
		1132	0.000227932
		1134	0.000218401
		1136	0.000207888
		1138	0.000196326
		1140	0.000183394
		1142	0.000168735
		1144	0.000152193
		1146	0.000133963
		1148	0.000114634
		1150	9.51071e-05
		1152	7.64393e-05
		1154	5.96422e-05
		1156	4.55437e-05
		1158	3.46962e-05
		1160	2.73745e-05
		1162	2.36367e-05
		1164	2.33993e-05
		1166	2.65273e-05
		1168	3.28893e-05
		1170	4.23797e-05
		1172	5.49102e-05
		1174	7.0398e-05
		1176	8.87093e-05
		1178	0.000109641
		1180	0.000132875
		1182	0.000157933
		1184	0.000184127
		1186	0.000210512
		1188	0.00023587
		1190	0.000258697
		1192	0.000277307
		1194	0.000289981
		1196	0.000295198
		1198	0.000291908
		1200	0.000279794
		1202	0.00025943
		1204	0.000232294
		1206	0.000200614
		1208	0.000167062
		1210	0.000134384
		1212	0.000105045
		1214	8.09827e-05
		1216	6.34924e-05
		1218	5.32506e-05
		1220	5.04091e-05
		1222	5.47008e-05
		1224	6.55049e-05
		1226	8.18561e-05
		1228	0.000102423
		1230	0.000125501
		1232	0.000149078
		1234	0.000170992
		1236	0.000189164
		1238	0.000201882
		1240	0.000208035
		1242	0.000207255
		1244	0.000199915
		1246	0.000187022
		1248	0.000169975
		1250	0.000150337
		1252	0.000129603
		1254	0.000109047
		1256	8.96377e-05
		1258	7.20282e-05
		1260	5.65879e-05
		1262	4.34612e-05
		1264	3.26134e-05
		1266	2.38984e-05
		1268	1.70939e-05
		1270	1.19386e-05
		1272	8.16091e-06
		1274	5.50256e-06
		1276	3.7365e-06
		1278	2.67989e-06
		1280	2.20191e-06
		1282	2.22425e-06
		1284	2.7328e-06
		1286	3.75113e-06
		1288	5.35162e-06
		1290	7.63794e-06
		1292	1.07304e-05
		1294	1.47471e-05
		1296	1.97809e-05
		1298	2.58745e-05
		1300	3.29937e-05
		1302	4.10141e-05
		1304	4.96956e-05
		1306	5.86927e-05
		1308	6.75668e-05
		1310	7.58165e-05
		1312	8.29233e-05
		1314	8.84039e-05
		1316	9.18646e-05
		1318	9.30481e-05
		1320	9.18646e-05
		1322	8.84039e-05
		1324	8.29233e-05
		1326	7.582e-05
		1328	6.75745e-05
		1330	5.87096e-05
		1332	4.97311e-05
		1334	4.10863e-05
		1336	3.31359e-05
		1338	2.61417e-05
		1340	2.02723e-05
		1342	1.5621e-05
		1344	1.22331e-05
		1346	1.01359e-05
		1348	9.36565e-06
		1350	9.98495e-06
		1352	1.20867e-05
		1354	1.57808e-05
		1356	2.11641e-05
		1358	2.82747e-05
		1360	3.70408e-05
		1362	4.72313e-05
		1364	5.84245e-05
		1366	7.00046e-05
		1368	8.11964e-05
		1370	9.11373e-05
		1372	9.89799e-05
		1374	0.000104007
		1376	0.000105736
		1378	0.000104003
		1380	9.89717e-05
		1382	9.11211e-05
		1384	8.11652e-05
		1386	6.99462e-05
		1388	5.83178e-05
		1390	4.70416e-05
		1392	3.67118e-05
		1394	2.77187e-05
		1396	2.0248e-05
		1398	1.43099e-05
		1400	9.78435e-06
		1402	6.47616e-06
		1404	4.15036e-06
		1406	2.58162e-06
		1408	1.57049e-06
		1410	9.57561e-07
		1412	6.27752e-07
		1414	5.09579e-07
		1416	5.72664e-07
		1418	8.25484e-07
		1420	1.31435e-06
		1422	2.12339e-06
		1424	3.37418e-06
		1426	5.22302e-06
		1428	7.85172e-06
		1430	1.14593e-05
		1432	1.62262e-05
		1434	2.22916e-05
		1436	2.97155e-05
		1438	3.84301e-05
		1440	4.82224e-05
		1442	5.87125e-05
		1444	6.93657e-05
		1446	7.9531e-05
		1448	8.85079e-05
		1450	9.5633e-05
		1452	0.000100374
		1454	0.000102418
		1456	0.000101728
		1458	9.85689e-05
		1460	9.34888e-05
		1462	8.72544e-05
		1464	8.0758e-05
		1466	7.49048e-05
		1468	7.0501e-05
		1470	6.81419e-05
		1472	6.81506e-05
		1474	7.05312e-05
		1476	7.49718e-05
		1478	8.08864e-05
		1480	8.74973e-05
		1482	9.39277e-05
		1484	9.93382e-05
		1486	0.000103037
		1488	0.000104579
		1490	0.000103839
		1492	0.000101023
		1494	9.66508e-05
		1496	9.14747e-05
		1498	8.63787e-05
		1500	8.22523e-05
		1502	7.98681e-05
		1504	7.97786e-05
		1506	8.22457e-05
		1508	8.72114e-05
		1510	9.43216e-05
		1512	0.00010297
		1514	0.000112398
		1516	0.000121791
		1518	0.000130385
		1520	0.000137552
		1522	0.000142851
		1524	0.000146055
		1526	0.000147132
		1528	0.000146197
		1530	0.000143463
		1532	0.000139176
		1534	0.000133576
		1536	0.000126863
		1538	0.000119206
		1540	0.000110746
		1542	0.000101626
		1544	9.20177e-05
		1546	8.2126e-05
		1548	7.22056e-05
		1550	6.25515e-05
		1552	5.34851e-05
		1554	4.53363e-05
		1556	3.84296e-05
		1558	3.30561e-05
		1560	2.94757e-05
		1562	2.78959e-05
		1564	2.846e-05
		1566	3.12288e-05
		1568	3.61653e-05
		1570	4.30953e-05
		1572	5.17144e-05
		1574	6.15714e-05
		1576	7.20971e-05
		1578	8.26344e-05
		1580	9.25167e-05
		1582	0.000101146
		1584	0.000108079
		1586	0.000113098
		1588	0.000116253
		1590	0.000117858
		1592	0.000118453
		1594	0.000118713
		1596	0.000119345
		1598	0.000120967
		1600	0.00012402
		1602	0.000128679
		1604	0.000134838
		1606	0.000142119
		1608	0.000149922
		1610	0.000157504
		1612	0.000164075
		1614	0.000168886
		1616	0.000171315
		1618	0.000170924
		1620	0.000167502
		1622	0.000161071
		1624	0.000151874
		1626	0.000140341
		1628	0.000127037
		1630	0.000112605
		1632	9.7707e-05
		1634	8.29651e-05
		1636	6.89186e-05
		1638	5.59915e-05
		1640	4.44748e-05
		1642	3.45329e-05
		1644	2.62023e-05
		1646	1.94235e-05
		1648	1.40636e-05
		1650	9.94392e-06
		1652	6.86467e-06
		1654	4.626e-06
		1656	3.04259e-06
		1658	1.95284e-06
		1660	1.22297e-06
		1662	7.47208e-07
		1664	4.45342e-07
		1666	2.62228e-07
		1668	1.53063e-07
		1670	9.07663e-08
		1672	6.37387e-08
		1674	5.95859e-08
		1676	7.57946e-08
		1678	1.14926e-07
		1680	1.86699e-07
		1682	3.05259e-07
		1684	4.93571e-07
		1686	7.76636e-07
		1688	1.1982e-06
		1690	1.81272e-06
		1692	2.6896e-06
		1694	3.91436e-06
		1696	5.58896e-06
		1698	7.84067e-06
		1700	1.07878e-05
		1702	1.45748e-05
		1704	1.93432e-05
		1706	2.52285e-05
		1708	3.23522e-05
		1710	4.08195e-05
		1712	5.06988e-05
		1714	6.20283e-05
		1716	7.48175e-05
		1718	8.90436e-05
		1720	0.000104658
		1722	0.000121595
		1724	0.000139773
		1726	0.000159103
		1728	0.000179481
		1730	0.000200789
		1732	0.000222876
		1734	0.000245543
		1736	0.000268527
		1738	0.000291485
		1740	0.000313984
		1742	0.000335502
		1744	0.000355443
		1746	0.000373166
		1748	0.000388018
		1750	0.000399385
		1752	0.000406741
		1754	0.00040969
		1756	0.000408012
		1758	0.000401679
		1760	0.000390867
		1762	0.000375947
		1764	0.000357459
		1766	0.000336072
		1768	0.000312537
		1770	0.000287633
		1772	0.000262115
		1774	0.000236671
		1776	0.000211886
		1778	0.00018822
		1780	0.000166
		1782	0.000145434
		1784	0.00012661
		1786	0.000109537
		1788	9.41646e-05
		1790	8.04053e-05
		1792	6.81517e-05
		1794	5.73012e-05
		1796	4.77597e-05
		1798	3.94355e-05
		1800	3.22564e-05
		1802	2.61591e-05
		1804	2.10932e-05
		1806	1.70148e-05
		1808	1.38975e-05
		1810	1.17344e-05
		1812	1.05468e-05
		1814	1.03884e-05
		1816	1.1359e-05
		1818	1.36038e-05
		1820	1.7336e-05
		1822	2.27869e-05
		1824	3.02518e-05
		1826	4.00354e-05
		1828	5.24411e-05
		1830	6.77619e-05
		1832	8.62531e-05
		1834	0.000108093
		1836	0.000133413
		1838	0.000162265
		1840	0.000194656
		1842	0.000230553
		1844	0.000269897
		1846	0.0003126
		1848	0.000358521
		1850	0.000407428
		1852	0.000458926
		1854	0.0005124
		1856	0.00056698
		1858	0.000621534
		1860	0.000674723
		1862	0.000725102
		1864	0.000771246
		1866	0.000811869
		1868	0.000845936
		1870	0.000872709
		1872	0.000891745
		1874	0.000902857
		1876	0.00090606
		1878	0.000901513
		1880	0.000889489
		1882	0.000870351
		1884	0.000844563
		1886	0.000812693
		1888	0.000775417
		1890	0.000733516
		1892	0.000687858
		1894	0.000639387
		1896	0.00058909
		1898	0.000537978
		1900	0.00048706
		1902	0.000437312
		1904	0.000389645
		1906	0.000344872
		1908	0.000303667
		1910	0.000266535
		1912	0.000233787
		1914	0.000205525
		1916	0.000181641
		1918	0.000161831
		1920	0.000145644
		1922	0.000132511
		1924	0.000121802
		1926	0.000112883
		1928	0.000105158
		1930	9.81257e-05
		1932	9.13856e-05
		1934	8.46701e-05
		1936	7.78382e-05
		1938	7.08758e-05
		1940	6.38563e-05
		1942	5.69302e-05
		1944	5.02871e-05
		1946	4.41526e-05
		1948	3.87255e-05
		1950	3.41979e-05
		1952	3.07131e-05
		1954	2.83754e-05
		1956	2.72477e-05
		1958	2.73376e-05
		1960	2.86072e-05
		1962	3.09772e-05
		1964	3.43262e-05
		1966	3.84924e-05
		1968	4.32767e-05
		1970	4.84536e-05
		1972	5.37758e-05
		1974	5.89838e-05
		1976	6.38174e-05
		1978	6.80295e-05
		1980	7.13995e-05
		1982	7.3747e-05
		1984	7.4943e-05
		1986	7.49181e-05
		1988	7.36667e-05
		1990	7.12459e-05
		1992	6.77701e-05
		1994	6.34013e-05
		1996	5.83339e-05
		1998	5.27882e-05
		2000	4.6981e-05
		2002	4.11222e-05
		2004	3.53997e-05
		2006	2.99704e-05
		2008	2.49549e-05
		2010	2.04356e-05
		2012	1.64584e-05
		2014	1.30364e-05
		2016	1.01554e-05
		2018	7.78046e-06
		2020	5.86251e-06
		2022	4.34441e-06
		2024	3.16626e-06
		2026	2.26951e-06
		2028	1.59988e-06
		2030	1.10921e-06
		2032	7.56321e-07
		2034	5.07188e-07
		2036	3.34504e-07
		2038	2.16972e-07
		2040	1.38412e-07
		2042	8.68388e-08
		2044	5.35825e-08
		2046	3.73643e-08
		2048	2.8046e-08
		2050	2.65158e-08
		2052	3.25877e-08
		2054	4.76809e-08
		2056	7.29417e-08
		2058	1.18932e-07
		2060	1.90502e-07
		2062	2.99764e-07
		2064	4.63381e-07
		2066	7.03683e-07
		2068	1.04977e-06
		2070	1.53848e-06
		2072	2.21497e-06
		2074	3.13273e-06
		2076	4.35269e-06
		2078	5.94117e-06
		2080	7.96645e-06
		2082	1.04939e-05
		2084	1.35796e-05
		2086	1.72631e-05
		2088	2.1559e-05
		2090	2.64495e-05
		2092	3.18777e-05
		2094	3.77428e-05
		2096	4.38996e-05
		2098	5.01611e-05
		2100	5.63056e-05
		2102	6.20892e-05
		2104	6.72604e-05
		2106	7.15785e-05
		2108	7.48315e-05
		2110	7.68539e-05
		2112	7.754e-05
		2114	7.68539e-05
		2116	7.48315e-05
		2118	7.15785e-05
		2120	6.72604e-05
		2122	6.20892e-05
		2124	5.63056e-05
		2126	5.01611e-05
		2128	4.38996e-05
		2130	3.77513e-05
		2132	3.18941e-05
		2134	2.64811e-05
		2136	2.16189e-05
		2138	1.73752e-05
		2140	1.37861e-05
		2142	1.08667e-05
		2144	8.62483e-06
		2146	7.0761e-06
		2148	6.25898e-06
		2150	6.24839e-06
		2152	7.16495e-06
		2154	9.17681e-06
		2156	1.24911e-05
		2158	1.73321e-05
		2160	2.39053e-05
		2162	3.23501e-05
		2164	4.26909e-05
		2166	5.47715e-05
		2168	6.82435e-05
		2170	8.25485e-05
		2172	9.69522e-05
		2174	0.000110613
		2176	0.000122682
		2178	0.000132413
		2180	0.000139262
		2182	0.00014298
		2184	0.000143613
		2186	0.000141501
		2188	0.000137203
		2190	0.000131399
		2192	0.000124788
		2194	0.000117994
		2196	0.000111501
		2198	0.00010563
		2200	0.000100548
		2202	9.62829e-05
		2204	9.27866e-05
		2206	8.9969e-05
		2208	8.77345e-05
		2210	8.60031e-05
		2212	8.47178e-05
		2214	8.38403e-05
		2216	8.33391e-05
		2218	8.31766e-05
		2220	8.32969e-05
		2222	8.36195e-05
		2224	8.40387e-05
		2226	8.44286e-05
		2228	8.46541e-05
		2230	8.45839e-05
		2232	8.41034e-05
		2234	8.31351e-05
		2236	8.16366e-05
		2238	7.96164e-05
		2240	7.71316e-05
		2242	7.42838e-05
		2244	7.12108e-05
		2246	6.80742e-05
		2248	6.50452e-05
		2250	6.22899e-05
		2252	5.99551e-05
		2254	5.81561e-05
		2256	5.69679e-05
		2258	5.64198e-05
		2260	5.64941e-05
		2262	5.71281e-05
		2264	5.82197e-05
		2266	5.96356e-05
		2268	6.12214e-05
		2270	6.28126e-05
		2272	6.42424e-05
		2274	6.53652e-05
		2276	6.6044e-05
		2278	6.61741e-05
		2280	6.56829e-05
		2282	6.4533e-05
		2284	6.2722e-05
		2286	6.02805e-05
		2288	5.72684e-05
		2290	5.37695e-05
		2292	4.98892e-05
		2294	4.57325e-05
		2296	4.14177e-05
		2298	3.70576e-05
		2300	3.27569e-05
		2302	2.86084e-05
		2304	2.46891e-05
		2306	2.10568e-05
		2308	1.77622e-05
		2310	1.48277e-05
		2312	1.22668e-05
		2314	1.00804e-05
		2316	8.26059e-06
		2318	6.79293e-06
		2320	5.65968e-06
		2322	4.84219e-06
		2324	4.32316e-06
		2326	4.0882e-06
		2328	4.12699e-06
		2330	4.43381e-06
		2332	5.00751e-06
		2334	5.85096e-06
		2336	6.97007e-06
		2338	8.37239e-06
		2340	1.00654e-05
		2342	1.20546e-05
		2344	1.43412e-05
		2346	1.69207e-05
		2348	1.97803e-05
		2350	2.29008e-05
		2352	2.62442e-05
		2354	2.97681e-05
		2356	3.34167e-05
		2358	3.71234e-05
		2360	4.08099e-05
		2362	4.43997e-05
		2364	4.78021e-05
		2366	5.09299e-05
		2368	5.36992e-05
		2370	5.60371e-05
		2372	5.78763e-05
		2374	5.91623e-05
		2376	5.98646e-05
		2378	5.99699e-05
		2380	5.94864e-05
		2382	5.84439e-05
		2384	5.68936e-05
		2386	5.49067e-05
		2388	5.2572e-05
		2390	4.9994e-05
		2392	4.72894e-05
		2394	4.45843e-05
		2396	4.20176e-05
		2398	3.9715e-05
		2400	3.78176e-05
		2402	3.64641e-05
		2404	3.57791e-05
		2406	3.58888e-05
		2408	3.69078e-05
		2410	3.89378e-05
		2412	4.20649e-05
		2414	4.63551e-05
		2416	5.18505e-05
		2418	5.85647e-05
		2420	6.64783e-05
		2422	7.55357e-05
		2424	8.56426e-05
		2426	9.66652e-05
		2428	0.000108432
		2430	0.000120741
		2432	0.000133354
		2434	0.000146025
		2436	0.000158497
		2438	0.000170521
		2440	0.000181865
		2442	0.000192337
		2444	0.000201776
		2446	0.00021008
		2448	0.000217199
		2450	0.000223148
		2452	0.00022797
		2454	0.000231776
		2456	0.000234687
		2458	0.000236856
		2460	0.00023844
		2462	0.000239582
		2464	0.000240409
		2466	0.00024103
		2468	0.000241516
		2470	0.000241911
		2472	0.000242238
		2474	0.000242503
		2476	0.0002427
		2478	0.000242829
		2480	0.000242905
		2482	0.000242963
		2484	0.000243064
		2486	0.000243301
		2488	0.000243791
		2490	0.000244677
		2492	0.000246113
		2494	0.000248258
		2496	0.000251258
		2498	0.000255237
		2500	0.000260284
		2502	0.000266437
		2504	0.000273682
		2506	0.000281939
		2508	0.000291071
		2510	0.000300877
		2512	0.000311105
		2514	0.000321461
		2516	0.000331623
		2518	0.000341255
		2520	0.000350027
		2522	0.000357625
		2524	0.000363785
		2526	0.000368274
		2528	0.000370929
		2530	0.000371654
		2532	0.000370412
		2534	0.000367243
		2536	0.000362235
		2538	0.000355528
		2540	0.000347299
		2542	0.000337749
		2544	0.000327091
		2546	0.000315537
		2548	0.000303288
		2550	0.000290525
		2552	0.000277413
		2554	0.000264081
		2556	0.000250641
		2558	0.000237176
		2560	0.000223763
		2562	0.000210453
		2564	0.000197294
		2566	0.000184332
		2568	0.00017161
		2570	0.000159176
		2572	0.000147088
		2574	0.000135399
		2576	0.00012417
		2578	0.000113465
		2580	0.000103345
		2582	9.3869e-05
		2584	8.50887e-05
		2586	7.70477e-05
		2588	6.97767e-05
		2590	6.33011e-05
		2592	5.76236e-05
		2594	5.27439e-05
		2596	4.86408e-05
		2598	4.52846e-05
		2600	4.2635e-05
		2602	4.06407e-05
		2604	3.92496e-05
		2606	3.83959e-05
		2608	3.80128e-05
		2610	3.80309e-05
		2612	3.83758e-05
		2614	3.8987e-05
		2616	3.97893e-05
		2618	4.07167e-05
		2620	4.17064e-05
		2622	4.26998e-05
		2624	4.36412e-05
		2626	4.44879e-05
		2628	4.51946e-05
		2630	4.57259e-05
		2632	4.60533e-05
		2634	4.61551e-05
		2636	4.60165e-05
		2638	4.56332e-05
		2640	4.49987e-05
		2642	4.41203e-05
		2644	4.30066e-05
		2646	4.16798e-05
		2648	4.01549e-05
		2650	3.84622e-05
		2652	3.66264e-05
		2654	3.46783e-05
		2656	3.26505e-05
		2658	3.05764e-05
		2660	2.84904e-05
		2662	2.64269e-05
		2664	2.44201e-05
		2666	2.25036e-05
		2668	2.07084e-05
		2670	1.90719e-05
		2672	1.76225e-05
		2674	1.63908e-05
		2676	1.54063e-05
		2678	1.46972e-05
		2680	1.429e-05
		2682	1.42088e-05
		2684	1.44749e-05
		2686	1.51052e-05
		2688	1.61118e-05
		2690	1.75001e-05
		2692	1.92677e-05
		2694	2.1403e-05
		2696	2.38839e-05
		2698	2.66773e-05
		2700	2.9738e-05
		2702	3.30091e-05
		2704	3.64225e-05
		2706	3.99e-05
		2708	4.33558e-05
		2710	4.66985e-05
		2712	4.98347e-05
		2714	5.26727e-05
		2716	5.51259e-05
		2718	5.71168e-05
		2720	5.85807e-05
		2722	5.94686e-05
		2724	5.97494e-05
		2726	5.94116e-05
		2728	5.84634e-05
		2730	5.69327e-05
		2732	5.48649e-05
		2734	5.23213e-05
		2736	4.9375e-05
		2738	4.61081e-05
		2740	4.26076e-05
		2742	3.89614e-05
		2744	3.52547e-05
		2746	3.15672e-05
		2748	2.79672e-05
		2750	2.45213e-05
		2752	2.12749e-05
		2754	1.82652e-05
		2756	1.55172e-05
		2758	1.30446e-05
		2760	1.08513e-05
		2762	8.93235e-06
		2764	7.27578e-06
		2766	5.86442e-06
		2768	4.68061e-06
		2770	3.69632e-06
		2772	2.88999e-06
		2774	2.23812e-06
		2776	1.71833e-06
		2778	1.31001e-06
		2780	9.94737e-07
		2782	7.56508e-07
		2784	5.81854e-07
		2786	4.59837e-07
		2788	3.81973e-07
		2790	3.42111e-07
		2792	3.36295e-07
		2794	3.62624e-07
		2796	4.21123e-07
		2798	5.13629e-07
		2800	6.43698e-07
		2802	8.16523e-07
		2804	1.03886e-06
		2806	1.31894e-06
		2808	1.66638e-06
		2810	2.09205e-06
		2812	2.60563e-06
		2814	3.22524e-06
		2816	3.96078e-06
		2818	4.82578e-06
		2820	5.83341e-06
		2822	6.99594e-06
		2824	8.32411e-06
		2826	9.8265e-06
		2828	1.15087e-05
		2830	1.33729e-05
		2832	1.54167e-05
		2834	1.7633e-05
		2836	2.00092e-05
		2838	2.25269e-05
		2840	2.51619e-05
		2842	2.78838e-05
		2844	3.0657e-05
		2846	3.34407e-05
		2848	3.61901e-05
		2850	3.88574e-05
		2852	4.13928e-05
		2854	4.37467e-05
		2856	4.58705e-05
		2858	4.7719e-05
		2860	4.92512e-05
		2862	5.04326e-05
		2864	5.12359e-05
		2866	5.16423e-05
		2868	5.16423e-05
		2870	5.12359e-05
		2872	5.04326e-05
		2874	4.92512e-05
		2876	4.7719e-05
		2878	4.58705e-05
		2880	4.37467e-05
		2882	4.13928e-05
		2884	3.88574e-05
		2886	3.61901e-05
		2888	3.34407e-05
		2890	3.0657e-05
		2892	2.78838e-05
		2894	2.51619e-05
		2896	2.25269e-05
		2898	2.00092e-05
		2900	1.7633e-05
		2902	1.54167e-05
		2904	1.33729e-05
		2906	1.15087e-05
		2908	9.8265e-06
		2910	8.32411e-06
		2912	6.99594e-06
		2914	5.83341e-06
		2916	4.82578e-06
		2918	3.96078e-06
		2920	3.22524e-06
		2922	2.60563e-06
		2924	2.08849e-06
		2926	1.66081e-06
		2928	1.31032e-06
		2930	1.02565e-06
		2932	7.96514e-07
		2934	6.13699e-07
		2936	4.69122e-07
		2938	3.55782e-07
		2940	2.67702e-07
		2942	1.99842e-07
		2944	1.4801e-07
		2946	1.08759e-07
		2948	7.92878e-08
		2950	5.73478e-08
		2952	4.11524e-08
		2954	2.92983e-08
		2956	2.06946e-08
		2958	1.45025e-08
		2960	1.00831e-08
		2962	6.9553e-09
		2964	4.75999e-09
		2966	3.23195e-09
		2968	0
		2970	0
		2972	0
		2974	0
		2976	0
		2978	0
		2980	0
		2982	0
		2984	0
		2986	0
		2988	0
		2990	0
		2992	0
		2994	0
		2996	0
		2998	0
		3000	0
		3002	0
		3004	0
		3006	0
		3008	0
		3010	0
		3012	0
		3014	0
		3016	0
		3018	0
		3020	0
		3022	3.70267e-09
		3024	5.65541e-09
		3026	8.55616e-09
		3028	1.28221e-08
		3030	1.9033e-08
		3032	2.79848e-08
		3034	4.0757e-08
		3036	5.87961e-08
		3038	8.40159e-08
		3040	1.18916e-07
		3042	1.66719e-07
		3044	2.31525e-07
		3046	3.18476e-07
		3048	4.33931e-07
		3050	5.85641e-07
		3052	7.82904e-07
		3054	1.0367e-06
		3056	1.35976e-06
		3058	1.7666e-06
		3060	2.27342e-06
		3062	2.89794e-06
		3064	3.65902e-06
		3066	4.57621e-06
		3068	5.66909e-06
		3070	6.95645e-06
		3072	8.45528e-06
		3074	1.01797e-05
		3076	1.21397e-05
		3078	1.43399e-05
		3080	1.67785e-05
		3082	1.94458e-05
		3084	2.23235e-05
		3086	2.53844e-05
		3088	2.85916e-05
		3090	3.18989e-05
		3092	3.52517e-05
		3094	3.85878e-05
		3096	4.18394e-05
		3098	4.49354e-05
		3100	4.78032e-05
		3102	5.03724e-05
		3104	5.25768e-05
		3106	5.43578e-05
		3108	5.56668e-05
		3110	5.64672e-05
		3112	5.67366e-05
		3114	5.64672e-05
		3116	5.56668e-05
		3118	5.43578e-05
		3120	5.25768e-05
		3122	5.03724e-05
		3124	4.78032e-05
		3126	4.49354e-05
		3128	4.18394e-05
		3130	3.85878e-05
		3132	3.52517e-05
		3134	3.18989e-05
		3136	2.85916e-05
		3138	2.53844e-05
		3140	2.23235e-05
		3142	1.94458e-05
		3144	1.67785e-05
		3146	1.43399e-05
		3148	1.21397e-05
		3150	1.01797e-05
		3152	8.45528e-06
		3154	6.95645e-06
		3156	5.66909e-06
		3158	4.57621e-06
		3160	3.65902e-06
		3162	2.89794e-06
		3164	2.27342e-06
		3166	1.7666e-06
		3168	1.35976e-06
		3170	1.0367e-06
		3172	7.82904e-07
		3174	5.85641e-07
		3176	4.33931e-07
		3178	3.18476e-07
		3180	2.31525e-07
		3182	1.66719e-07
		3184	1.18916e-07
		3186	8.40159e-08
		3188	5.87961e-08
		3190	4.0757e-08
		3192	2.79848e-08
		3194	1.9033e-08
		3196	1.28221e-08
		3198	8.55616e-09
		3200	5.65541e-09
		3202	3.70267e-09
		3204	0
		3206	0
		3208	0
		3210	0
		3212	0
		3214	0
		3216	0
		3218	0
		3220	0
		3222	0
		3224	0
		3226	0
		3228	0
		3230	0
		3232	0
		3234	0
		3236	0
		3238	0
		3240	0
		3242	0
		3244	0
		3246	0
		3248	0
		3250	0
		3252	0
		3254	0
		3256	0
		3258	0
		3260	0
		3262	0
		3264	0
		3266	0
		3268	0
		3270	0
		3272	0
		3274	0
		3276	0
		3278	0
		3280	0
		3282	0
		3284	0
		3286	0
		3288	0
		3290	0
		3292	0
		3294	0
		3296	0
		3298	0
		3300	0
		3302	0
		3304	0
		3306	0
		3308	0
		3310	0
		3312	0
		3314	0
		3316	0
		3318	0
		3320	0
		3322	0
		3324	0
		3326	0
		3328	0
		3330	0
		3332	0
		3334	0
		3336	0
		3338	0
		3340	0
		3342	0
		3344	0
		3346	0
		3348	0
		3350	0
		3352	0
		3354	0
		3356	0
		3358	0
		3360	0
		3362	0
		3364	0
		3366	0
		3368	0
		3370	0
		3372	0
		3374	0
		3376	0
		3378	0
		3380	0
		3382	0
		3384	0
		3386	0
		3388	0
		3390	0
		3392	0
		3394	0
		3396	0
		3398	0
		3400	0
		3402	0
		3404	0
		3406	0
		3408	0
		3410	0
		3412	0
		3414	0
		3416	0
		3418	0
		3420	0
		3422	0
		3424	0
		3426	0
		3428	0
		3430	0
		3432	0
		3434	0
		3436	0
		3438	0
		3440	0
		3442	0
		3444	0
		3446	0
		3448	0
		3450	0
		3452	0
		3454	0
		3456	0
		3458	0
		3460	3.06698e-09
		3462	4.2278e-09
		3464	5.79609e-09
		3466	7.90264e-09
		3468	1.07158e-08
		3470	1.4451e-08
		3472	1.93814e-08
		3474	2.58518e-08
		3476	3.42937e-08
		3478	4.52432e-08
		3480	5.93622e-08
		3482	7.74611e-08
		3484	1.00525e-07
		3486	1.29742e-07
		3488	1.66535e-07
		3490	2.12593e-07
		3492	2.69903e-07
		3494	3.40787e-07
		3496	4.27933e-07
		3498	5.34423e-07
		3500	6.63762e-07
		3502	8.19891e-07
		3504	1.0072e-06
		3506	1.23054e-06
		3508	1.49517e-06
		3510	1.80677e-06
		3512	2.17136e-06
		3514	2.59524e-06
		3516	3.0849e-06
		3518	3.64688e-06
		3520	4.28765e-06
		3522	5.01341e-06
		3524	5.82995e-06
		3526	6.74238e-06
		3528	7.75494e-06
		3530	8.87076e-06
		3532	1.00916e-05
		3534	1.14177e-05
		3536	1.28473e-05
		3538	1.43768e-05
		3540	1.60003e-05
		3542	1.77098e-05
		3544	1.94947e-05
		3546	2.1342e-05
		3548	2.32365e-05
		3550	2.51607e-05
		3552	2.70953e-05
		3554	2.90189e-05
		3556	3.0909e-05
		3558	3.2742e-05
		3560	3.4494e-05
		3562	3.61409e-05
		3564	3.76592e-05
		3566	3.90266e-05
		3568	4.02223e-05
		3570	4.12278e-05
		3572	4.20272e-05
		3574	4.26077e-05
		3576	4.29598e-05
		3578	4.30778e-05
		3580	4.29598e-05
		3582	4.26077e-05
		3584	4.20272e-05
		3586	4.12278e-05
		3588	4.02223e-05
		3590	3.90266e-05
		3592	3.76592e-05
		3594	3.61409e-05
		3596	3.4494e-05
		3598	3.2742e-05
		3600	3.0909e-05
		3602	2.90189e-05
		3604	2.70953e-05
		3606	2.51607e-05
		3608	2.32365e-05
		3610	2.1342e-05
		3612	1.94947e-05
		3614	1.77098e-05
		3616	1.60003e-05
		3618	1.43768e-05
		3620	1.28473e-05
		3622	1.14177e-05
		3624	1.00916e-05
		3626	8.87076e-06
		3628	7.75494e-06
		3630	6.74238e-06
		3632	5.82995e-06
		3634	5.01341e-06
		3636	4.28765e-06
		3638	3.64688e-06
		3640	3.0849e-06
		3642	2.59524e-06
		3644	2.17136e-06
		3646	1.80677e-06
		3648	1.49517e-06
		3650	1.23054e-06
		3652	1.0072e-06
		3654	8.19891e-07
		3656	6.63762e-07
		3658	5.34423e-07
		3660	4.27933e-07
		3662	3.40787e-07
		3664	2.69903e-07
		3666	2.12593e-07
		3668	1.66535e-07
		3670	1.29742e-07
		3672	1.00525e-07
		3674	7.74611e-08
		3676	5.93622e-08
		3678	4.52432e-08
		3680	3.42937e-08
		3682	2.58518e-08
		3684	1.93814e-08
		3686	1.4451e-08
		3688	1.07158e-08
		3690	7.90264e-09
		3692	5.79609e-09
		3694	4.2278e-09
		3696	3.06698e-09
		3698	0
		3700	0
		3702	0
		3704	0
		3706	0
		3708	0
		3710	0
		3712	0
		3714	0
		3716	0
		3718	0
		3720	0
		3722	0
		3724	0
		3726	0
		3728	0
		3730	0
		3732	0
		3734	0
		3736	0
		3738	0
		3740	0
		3742	0
		3744	0
		3746	0
		3748	0
		3750	0
		3752	0
		3754	0
		3756	0
		3758	0
		3760	0
		3762	0
		3764	0
		3766	0
		3768	0
		3770	0
		3772	0
		3774	0
		3776	0
		3778	0
		3780	0
		3782	0
		3784	0
		3786	0
		3788	0
		3790	0
		3792	0
		3794	0
		3796	0
		3798	0
		3800	0
		3802	0
		3804	0
		3806	0
		3808	0
		3810	0
		3812	0
		3814	0
		3816	0
		3818	0
		3820	0
		3822	0
		3824	0
		3826	0
		3828	0
		3830	0
		3832	0
		3834	0
		3836	0
		3838	0
		3840	0
		3842	0
		3844	0
		3846	0
		3848	0
		3850	0
		3852	0
		3854	0
		3856	0
		3858	0
		3860	0
		3862	0
		3864	0
		3866	0
		3868	0
		3870	0
		3872	0
		3874	0
		3876	0
		3878	0
		3880	0
		3882	0
		3884	0
		3886	0
		3888	0
		3890	0
		3892	0
		3894	0
		3896	0
		3898	0
		3900	0
		3902	0
		3904	0
		3906	0
		3908	0
		3910	0
		3912	0
		3914	0
		3916	0
		3918	0
		3920	0
		3922	0
		3924	0
		3926	0
		3928	0
		3930	0
		3932	0
		3934	0
		3936	0
		3938	0
		3940	0
		3942	0
		3944	0
		3946	0
		3948	0
		3950	0
		3952	0
		3954	0
		3956	0
		3958	0
		3960	0
		3962	0
		3964	0
		3966	0
		3968	0
		3970	0
		3972	0
		3974	0
		3976	0
		3978	0
		3980	0
		3982	0
		3984	0
		3986	0
		3988	0
		3990	0
		3992	0
		3994	0
		3996	0
		3998	0
[truncated: 1 more rows]

## Sheet: PlotDat7
Source sheet	Sheet3	0	0	140	0	0	0
Plot name	ProbDens3	1.4	0	210	0	2798.6	0
Plot Type	16	2.8	0	210	1
1st free col	9	4.2	0	140	1
Sigma Level	2	5.6	0	140	0
Absolute Errs	TRUE	7	0	ErrBox	ErrBox
Symbol Type	1	8.4	0	210	0
Inverse Plot	FALSE	9.8	0	280	0
Color Plot	TRUE	11.2	0	280	28
3D plot	FALSE	12.6	0	210	28
Linear	FALSE	14	0	210	0
Data Range	D1:E98	15.4	0	ErrBox	ErrBox
Filled Symbols	FALSE	16.8	0	280	0
ConcAge	FALSE	18.2	0	350	0
ConcSwap	FALSE	19.6	0	350	9
1st Symbol-row	1	21	0	280	9
		22.4	0	280	0
		23.8	0	ErrBox	ErrBox
		25.2	0	350	0
		26.6	0	420	0
		28	0	420	10
		29.4	0	350	10
		30.8	0	350	0
		32.2	0	ErrBox	ErrBox
		33.6	0	420	0
		35	0	490	0
		36.4	0	490	13
		37.8	0	420	13
		39.2	0	420	0
		40.6	0	ErrBox	ErrBox
		42	0	490	0
		43.4	0	560	0
		44.8	0	560	2
		46.2	0	490	2
		47.6	0	490	0
		49	0	ErrBox	ErrBox
		50.4	0	560	0
		51.8	0	630	0
		53.2	0	630	2
		54.6	0	560	2
		56	0	560	0
		57.4	0	ErrBox	ErrBox
		58.8	0	630	0
		60.2	0	700	0
		61.6	0	700	3
		63	0	630	3
		64.4	0	630	0
		65.8	0	ErrBox	ErrBox
		67.2	0	700	0
		68.6	0	770	0
		70	0	770	4
		71.4	0	700	4
		72.8	0	700	0
		74.2	0	ErrBox	ErrBox
		75.6	0	770	0
		77	0	840	0
		78.4	0	840	4
		79.8	0	770	4
		81.2	0	770	0
		82.6	0	ErrBox	ErrBox
		84	0	910	0
		85.4	0	980	0
		86.8	0	980	3
		88.2	0	910	3
		89.6	0	910	0
		91	0	ErrBox	ErrBox
		92.4	0	980	0
		93.8	0	1050	0
		95.2	0	1050	1
		96.6	0	980	1
		98	0	980	0
		99.4	0	ErrBox	ErrBox
		100.8	0	1400	0
		102.2	0	1470	0
		103.6	0	1470	1
		105	0	1400	1
		106.4	0	1400	0
		107.8	0	ErrBox	ErrBox
		109.2	0	1470	0
		110.6	0	1540	0
		112	0	1540	1
		113.4	0	1470	1
		114.8	0	1470	0
		116.2	0	ErrBox	ErrBox
		117.6	0	1540	0
		119	0	1610	0
		120.4	0	1610	1
		121.8	0	1540	1
		123.2	0	1540	0
		124.6	0	ErrBox	ErrBox
		126	0	1610	0
		127.4	0	1680	0
		128.8	0	1680	2
		130.2	0	1610	2
		131.6	0	1610	0
		133	0	ErrBox	ErrBox
		134.4	0	1680	0
		135.8	0	1750	0
		137.2	0	1750	2
		138.6	0	1680	2
		140	0	1680	0
		141.4	0	ErrBox	ErrBox
		142.8	0	1750	0
		144.2	0	1820	0
		145.6	0	1820	2
		147	0	1750	2
		148.4	0	1750	0
		149.8	0	ErrBox	ErrBox
		151.2	0	1820	0
		152.6	0	1890	0
		154	0	1890	2
		155.4	0	1820	2
		156.8	0	1820	0
		158.2	0	ErrBox	ErrBox
		159.6	0	1890	0
		161	0	1960	0
		162.4	0	1960	2
		163.8	0	1890	2
		165.2	0	1890	0
		166.6	0	ErrBox	ErrBox
		168	0	2100	0
		169.4	0	2170	0
		170.8	0	2170	1
		172.2	0	2100	1
		173.6	0	2100	0
		175	0	ErrBox	ErrBox
		176.4	0	2450	0
		177.8	0	2520	0
		179.2	0	2520	2
		180.6	0	2450	2
		182	0	2450	0
		183.4	0	ErrBox	ErrBox
		184.8	0	2520	0
		186.2	0	2590	0
		187.6	0	2590	1
		189	0	2520	1
		190.4	0	2520	0
		191.8	0	ErrBox	ErrBox
		193.2	0	2660	0
		194.6	0	2730	0
		196	0	2730	1
		197.4	0	2660	1
		198.8	1.5621e-07	2660	0
		200.2	2.76004e-06	ErrBox	ErrBox
		201.6	2.91247e-05
		203	0.000183549
		204.4	0.000690852
		205.8	0.00155296
		207.2	0.00208489
		208.6	0.00167224
		210	0.000810974
		211.4	0.000328291
		212.8	0.000552492
		214.2	0.00145412
		215.6	0.00225567
		217	0.00204007
		218.4	0.00150133
		219.8	0.00170742
		221.2	0.00210924
		222.6	0.00175712
		224	0.00101853
		225.4	0.000842599
		226.8	0.00140526
		228.2	0.00203112
		229.6	0.00214365
		231	0.00211102
		232.4	0.00231526
		233.8	0.00226115
		235.2	0.00185774
		236.6	0.00181631
		238	0.0023425
		239.4	0.00326371
		240.8	0.00472876
		242.2	0.00637142
		243.6	0.00720861
		245	0.0071454
		246.4	0.00687754
		247.8	0.00660518
		249.2	0.00611585
		250.6	0.00556483
		252	0.00533138
		253.4	0.00549695
		254.8	0.00594835
		256.2	0.00648626
		257.6	0.00683431
		259	0.00687158
		260.4	0.00669533
		261.8	0.00657759
		263.2	0.00679816
		264.6	0.00715366
		266	0.00697226
		267.4	0.00602697
		268.8	0.0050018
		270.2	0.00462806
		271.6	0.00478826
		273	0.00490389
		274.4	0.00483266
		275.8	0.00477869
		277.2	0.00447884
		278.6	0.00346688
		280	0.00205697
		281.4	0.00101961
		282.8	0.000636478
		284.2	0.000737464
		285.6	0.00119768
		287	0.00200906
		288.4	0.0030029
		289.8	0.00370577
		291.2	0.00366567
		292.6	0.0029535
		294	0.00214813
		295.4	0.00175821
		296.8	0.0017723
		298.2	0.00179042
		299.6	0.0015056
		301	0.000985053
		302.4	0.00050242
		303.8	0.000241891
		305.2	0.000244649
		306.6	0.000530023
		308	0.00113688
		309.4	0.00202501
		310.8	0.00298415
		312.2	0.00369942
		313.6	0.00393975
		315	0.00369964
		316.4	0.00317489
		317.8	0.00258707
		319.2	0.0020211
		320.6	0.00145586
		322	0.00090989
		323.4	0.000470131
		324.8	0.000195328
		326.2	6.43975e-05
		327.6	1.67453e-05
		329	3.42481e-06
		330.4	5.51024e-07
		331.8	9.2672e-08
		333.2	1.52377e-07
		334.6	8.4234e-07
		336	3.88947e-06
		337.4	1.50139e-05
		338.8	4.84282e-05
		340.2	0.000130695
		341.6	0.000295713
		343	0.000563406
		344.4	0.000911742
		345.8	0.00127319
		347.2	0.0015729
		348.6	0.00177157
		350	0.0018579
		351.4	0.0018078
		352.8	0.00158852
		354.2	0.00121836
		355.6	0.000793494
		357	0.000431166
		358.4	0.000193885
		359.8	7.40213e-05
		361.2	3.38493e-05
		362.6	5.05199e-05
		364	0.000138667
		365.4	0.00034995
		366.8	0.00074583
		368.2	0.00134136
		369.6	0.00205033
		371	0.00269008
		372.4	0.00306701
		373.8	0.00308377
		375.2	0.00278735
		376.6	0.00233879
		378	0.00193512
		379.4	0.00170983
		380.8	0.00165087
		382.2	0.00161528
		383.6	0.00147094
		385	0.00124812
		386.4	0.00113799
		387.8	0.00132725
		389.2	0.00181789
		390.6	0.00238785
		392	0.00273892
		393.4	0.00272324
		394.8	0.00243804
		396.2	0.00209079
		397.6	0.00179284
		399	0.00150837
		400.4	0.00117186
		401.8	0.000796424
		403.2	0.000459374
		404.6	0.000223974
		406	0.00010075
		407.4	6.96818e-05
		408.8	0.000119602
		410.2	0.000267321
		411.6	0.000547089
		413	0.000976139
		414.4	0.00151444
		415.8	0.00205245
		417.2	0.00245439
		418.6	0.00263928
		420	0.00263358
		421.4	0.00254243
		422.8	0.00246001
		424.2	0.00239711
		425.6	0.00228444
		427	0.00204262
		428.4	0.00165906
		429.8	0.0012121
		431.2	0.00082981
		432.6	0.000623177
		434	0.000643938
		435.4	0.000880217
		436.8	0.00127107
		438.2	0.00172466
		439.6	0.00214591
		441	0.00247787
		442.4	0.00273787
		443.8	0.00301272
		445.2	0.00339613
		446.6	0.00390073
		448	0.00441454
		449.4	0.0047469
		450.8	0.00473638
		452.2	0.00434107
		453.6	0.0036539
		455	0.0028507
		456.4	0.00211587
		457.8	0.0015812
		459.2	0.00129267
		460.6	0.00121226
		462	0.00125303
		463.4	0.0013285
		464.8	0.00138703
		466.2	0.00141411
		467.6	0.00141143
		469	0.00137865
		470.4	0.00131516
		471.8	0.00123444
		473.2	0.00116878
		474.6	0.00115224
		476	0.00119416
		477.4	0.00126807
		478.8	0.00132755
		480.2	0.00133663
		481.6	0.00128981
		483	0.00120764
		484.4	0.00111555
		485.8	0.00102519
		487.2	0.000931837
		488.6	0.000825137
		490	0.000702458
		491.4	0.000575583
		492.8	0.000468916
		494.2	0.000412094
		495.6	0.000429603
		497	0.000528935
		498.4	0.000690513
		499.8	0.000866341
		501.2	0.00099358
		502.6	0.00102074
		504	0.000932177
		505.4	0.000754571
		506.8	0.000540799
		508.2	0.000343037
		509.6	0.000192587
		511	9.58355e-05
		512.4	4.27399e-05
		513.8	1.83688e-05
		515.2	1.07986e-05
		516.6	1.38555e-05
		518	2.67701e-05
		519.4	5.27964e-05
		520.8	9.75734e-05
		522.2	0.000166996
		523.6	0.000264322
		525	0.000386824
		526.4	0.000523412
		527.8	0.000654826
		529.2	0.000757459
		530.6	0.000810109
		532	0.000801086
		533.4	0.000732431
		534.8	0.000619163
		536.2	0.000483944
		537.6	0.000349733
		539	0.000233684
		540.4	0.000144368
		541.8	8.24797e-05
		543.2	4.36109e-05
		544.6	2.14732e-05
		546	1.02673e-05
		547.4	5.97474e-06
		548.8	6.86585e-06
		550.2	1.37167e-05
		551.6	2.99998e-05
		553	6.18576e-05
		554.4	0.000117235
		555.8	0.000203451
		557.2	0.000323137
		558.6	0.000469657
		560	0.000624655
		561.4	0.000760266
		562.8	0.000846753
		564.2	0.000863007
		565.6	0.000804892
		567	0.000686952
		568.4	0.000536515
		569.8	0.000383445
		571.2	0.000250778
		572.6	0.000150087
		574	8.21981e-05
		575.4	4.11952e-05
		576.8	1.88929e-05
		578.2	7.92893e-06
		579.6	3.04507e-06
		581	1.07015e-06
		582.4	3.4416e-07
		583.8	1.01284e-07
		585.2	2.72764e-08
		586.6	0
		588	0
		589.4	0
		590.8	0
		592.2	0
		593.6	0
		595	2.04521e-08
		596.4	6.3559e-08
		597.8	1.8513e-07
		599.2	5.05404e-07
		600.6	1.29318e-06
		602	3.10129e-06
		603.4	6.97083e-06
		604.8	1.46855e-05
		606.2	2.89969e-05
		607.6	5.36836e-05
		609	9.31307e-05
		610.4	0.000151439
		611.8	0.000230834
		613.2	0.000329848
		614.6	0.000441915
		616	0.000555298
		617.4	0.000654712
		618.8	0.000725006
		620.2	0.000755455
		621.6	0.000743477
		623	0.000696264
		624.4	0.000629764
		625.8	0.00056549
		627.2	0.000526368
		628.6	0.000532813
		630	0.000599649
		631.4	0.000733742
		632.8	0.00093201
		634.2	0.00117986
		635.6	0.0014509
		637	0.00170921
		638.4	0.00191488
		639.8	0.00203236
		641.2	0.00203913
		642.6	0.00193183
		644	0.00172715
		645.4	0.00145707
		646.8	0.00116024
		648.2	0.000872656
		649.6	0.000620649
		651	0.000418072
		652.4	0.000267288
		653.8	0.000162631
		655.2	9.44806e-05
		656.6	5.26057e-05
		658	2.81869e-05
		659.4	1.45935e-05
		660.8	7.32735e-06
		662.2	3.57774e-06
		663.6	1.70142e-06
		665	7.88222e-07
		666.4	3.554e-07
		667.8	1.46231e-07
		669.2	6.34912e-08
		670.6	2.6486e-08
		672	1.06157e-08
		673.4	0
		674.8	0
		676.2	0
		677.6	0
		679	0
		680.4	0
		681.8	0
		683.2	0
		684.6	0
		686	0
		687.4	0
		688.8	0
		690.2	0
		691.6	0
		693	0
		694.4	0
		695.8	0
		697.2	0
		698.6	0
		700	0
		701.4	0
		702.8	2.71833e-08
		704.2	7.55943e-08
		705.6	1.99081e-07
		707	4.96509e-07
		708.4	1.17268e-06
		709.8	2.62293e-06
		711.2	5.55583e-06
		712.6	1.11594e-05
		714	2.12133e-05
		715.4	3.82013e-05
		716.8	6.51821e-05
		718.2	0.000105408
		719.6	0.000161615
		721	0.000235076
		722.4	0.000324672
		723.8	0.000426318
		725.2	0.000533206
		726.6	0.000636931
		728	0.000729388
		729.4	0.000804734
		730.8	0.000860861
		732.2	0.000899561
		733.6	0.000925436
		735	0.000944022
		736.4	0.000960021
		737.8	0.000976432
		739.2	0.000994878
		740.6	0.00101668
		742	0.00104385
		743.4	0.00107908
		744.8	0.0011246
		746.2	0.00118019
		747.6	0.00124151
		749	0.00129953
		750.4	0.00134182
		751.8	0.00135529
		753.2	0.00132953
		754.6	0.00125974
		756	0.00114815
		757.4	0.0010036
		758.8	0.000839523
		760.2	0.000671014
		761.6	0.000511821
		763	0.000372188
		764.4	0.000257812
		765.8	0.000169991
		767.2	0.000106624
		768.6	6.3582e-05
		770	3.60251e-05
		771.4	1.93896e-05
		772.8	9.93076e-06
		774.2	4.86878e-06
		775.6	2.39427e-06
		777	1.43041e-06
		778.4	1.52375e-06
		779.8	2.73568e-06
		781.2	5.70448e-06
		782.6	1.17603e-05
		784	2.32083e-05
		785.4	4.3628e-05
		786.8	7.7994e-05
		788.2	0.00013261
		789.6	0.00021448
		791	0.000330076
		792.4	0.000483468
		793.8	0.000674258
		795.2	0.000895753
		796.6	0.00113419
		798	0.00136957
		799.4	0.00157827
		800.8	0.00173707
		802.2	0.00182759
		803.6	0.00184003
		805	0.00177508
		806.4	0.00164369
		807.8	0.00146469
		809.2	0.0012611
		810.6	0.00105608
		812	0.000869437
		813.4	0.000715334
		814.8	0.000601278
		816.2	0.000528377
		817.6	0.000492438
		819	0.000485533
		820.4	0.000497703
		821.8	0.000518553
		823.2	0.000538578
		824.6	0.000550166
		826	0.000548223
		827.4	0.000530402
		828.8	0.000496971
		830.2	0.000450342
		831.6	0.000394407
		833	0.000333711
		834.4	0.00027273
		835.8	0.000215286
		837.2	0.000164123
		838.6	0.000120842
		840	8.59275e-05
		841.4	5.90085e-05
		842.8	3.91349e-05
		844.2	2.50658e-05
		845.6	1.55048e-05
		847	9.26226e-06
		848.4	5.34362e-06
		849.8	2.97729e-06
		851.2	1.60205e-06
		852.6	8.32521e-07
		854	4.17814e-07
		855.4	2.02506e-07
		856.8	9.47895e-08
		858.2	4.28499e-08
		859.6	1.87071e-08
		861	0
		862.4	0
		863.8	0
		865.2	0
		866.6	0
		868	0
		869.4	0
		870.8	0
		872.2	0
		873.6	0
		875	0
		876.4	0
		877.8	0
		879.2	1.29752e-08
		880.6	3.01676e-08
		882	6.77388e-08
		883.4	1.46893e-07
		884.8	3.07632e-07
		886.2	6.22198e-07
		887.6	1.21533e-06
		889	2.29259e-06
		890.4	4.17663e-06
		891.8	7.34839e-06
		893.2	1.24861e-05
		894.6	2.05029e-05
		896	3.24965e-05
		897.4	4.97438e-05
		898.8	7.35412e-05
		900.2	0.000105007
		901.6	0.000144814
		903	0.000192896
		904.4	0.000248189
		905.8	0.000308472
		907.2	0.0003704
		908.6	0.000429756
		910	0.000481919
		911.4	0.000522505
		912.8	0.000548073
		914.2	0.000556659
		915.6	0.000548232
		917	0.000524712
		918.4	0.000489723
		919.8	0.000448068
		921.2	0.000405055
		922.6	0.000365813
		924	0.000334732
		925.4	0.000315113
		926.8	0.000309035
		928.2	0.000317419
		929.6	0.00034021
		931	0.000376582
		932.4	0.000425096
		933.8	0.000483765
		935.2	0.000550033
		936.6	0.000620704
		938	0.000691892
		939.4	0.000759082
		940.8	0.000817352
		942.2	0.000861778
		943.6	0.000887987
		945	0.000892751
		946.4	0.00087452
		947.8	0.000833736
		949.2	0.000772861
		950.6	0.000696121
		952	0.000608884
		953.4	0.000517
		954.8	0.000426049
		956.2	0.000340736
		957.6	0.000264489
		959	0.000199312
		960.4	0.000145874
		961.8	0.000103762
		963.2	7.1788e-05
		964.6	4.83729e-05
		966	3.18174e-05
		967.4	2.05255e-05
		968.8	1.31398e-05
		970.2	8.6058e-06
		971.6	6.18812e-06
		973	5.46021e-06
		974.4	6.28446e-06
		975.8	8.79302e-06
		977.2	1.33705e-05
		978.6	2.06332e-05
		980	3.13929e-05
		981.4	4.65835e-05
		982.8	6.72035e-05
		984.2	9.4086e-05
		985.6	0.00012778
		987	0.000168315
		988.4	0.000215043
		989.8	0.000266457
		991.2	0.000320205
		992.6	0.00037319
		994	0.000421824
		995.4	0.000462415
		996.8	0.000491623
		998.2	0.000506912
		999.6	0.000506912
		1001	0.000491623
		1002.4	0.000462415
		1003.8	0.000421824
		1005.2	0.00037319
		1006.6	0.000320205
		1008	0.000266457
		1009.4	0.000215043
		1010.8	0.000168315
		1012.2	0.000127767
		1013.6	9.40627e-05
		1015	6.71606e-05
		1016.4	4.65063e-05
		1017.8	3.12326e-05
		1019.2	2.03425e-05
		1020.6	1.28499e-05
		1022	7.8722e-06
		1023.4	4.67726e-06
		1024.8	2.69517e-06
		1026.2	1.5062e-06
		1027.6	8.16349e-07
		1029	4.29112e-07
		1030.4	2.18758e-07
		1031.8	1.08158e-07
		1033.2	5.18623e-08
		1034.6	2.41182e-08
		1036	1.08777e-08
		1037.4	0
		1038.8	0
		1040.2	0
		1041.6	0
		1043	0
		1044.4	0
		1045.8	0
		1047.2	0
		1048.6	0
		1050	0
		1051.4	0
		1052.8	0
		1054.2	0
		1055.6	0
		1057	0
		1058.4	0
		1059.8	0
		1061.2	0
		1062.6	0
		1064	0
		1065.4	0
		1066.8	0
		1068.2	0
		1069.6	0
		1071	0
		1072.4	0
		1073.8	0
		1075.2	0
		1076.6	0
		1078	0
		1079.4	0
		1080.8	0
		1082.2	0
		1083.6	0
		1085	0
		1086.4	0
		1087.8	0
		1089.2	0
		1090.6	0
		1092	0
		1093.4	0
		1094.8	0
		1096.2	0
		1097.6	0
		1099	0
		1100.4	0
		1101.8	0
		1103.2	0
		1104.6	0
		1106	0
		1107.4	0
		1108.8	0
		1110.2	0
		1111.6	0
		1113	0
		1114.4	0
		1115.8	0
		1117.2	0
		1118.6	0
		1120	0
		1121.4	0
		1122.8	0
		1124.2	0
		1125.6	0
		1127	0
		1128.4	0
		1129.8	0
		1131.2	0
		1132.6	0
		1134	0
		1135.4	0
		1136.8	0
		1138.2	0
		1139.6	0
		1141	0
		1142.4	0
		1143.8	0
		1145.2	0
		1146.6	0
		1148	0
		1149.4	0
		1150.8	0
		1152.2	0
		1153.6	0
		1155	0
		1156.4	0
		1157.8	0
		1159.2	0
		1160.6	0
		1162	0
		1163.4	0
		1164.8	0
		1166.2	0
		1167.6	0
		1169	0
		1170.4	0
		1171.8	0
		1173.2	0
		1174.6	0
		1176	0
		1177.4	0
		1178.8	0
		1180.2	0
		1181.6	0
		1183	0
		1184.4	0
		1185.8	0
		1187.2	0
		1188.6	0
		1190	0
		1191.4	0
		1192.8	0
		1194.2	0
		1195.6	0
		1197	0
		1198.4	0
		1199.8	0
		1201.2	0
		1202.6	0
		1204	0
		1205.4	0
		1206.8	0
		1208.2	0
		1209.6	0
		1211	0
		1212.4	0
		1213.8	0
		1215.2	0
		1216.6	0
		1218	0
		1219.4	0
		1220.8	0
		1222.2	0
		1223.6	0
		1225	0
		1226.4	0
		1227.8	0
		1229.2	0
		1230.6	0
		1232	0
		1233.4	0
		1234.8	0
		1236.2	0
		1237.6	0
		1239	0
		1240.4	0
		1241.8	0
		1243.2	0
		1244.6	0
		1246	0
		1247.4	0
		1248.8	0
		1250.2	0
		1251.6	0
		1253	0
		1254.4	0
		1255.8	0
		1257.2	0
		1258.6	0
		1260	0
		1261.4	0
		1262.8	0
		1264.2	0
		1265.6	0
		1267	0
		1268.4	0
		1269.8	0
		1271.2	0
		1272.6	0
		1274	0
		1275.4	0
		1276.8	0
		1278.2	0
		1279.6	0
		1281	0
		1282.4	0
		1283.8	0
		1285.2	0
		1286.6	0
		1288	0
		1289.4	0
		1290.8	0
		1292.2	0
		1293.6	0
		1295	0
		1296.4	0
		1297.8	0
		1299.2	0
		1300.6	0
		1302	0
		1303.4	0
		1304.8	0
		1306.2	0
		1307.6	0
		1309	0
		1310.4	0
		1311.8	0
		1313.2	0
		1314.6	0
		1316	0
		1317.4	0
		1318.8	0
		1320.2	0
		1321.6	0
		1323	0
		1324.4	0
		1325.8	0
		1327.2	0
		1328.6	0
		1330	0
		1331.4	0
		1332.8	0
		1334.2	0
		1335.6	0
		1337	0
		1338.4	0
		1339.8	0
		1341.2	0
		1342.6	0
		1344	0
		1345.4	0
		1346.8	0
		1348.2	0
		1349.6	0
		1351	0
		1352.4	0
		1353.8	0
		1355.2	0
		1356.6	0
		1358	0
		1359.4	0
		1360.8	0
		1362.2	0
		1363.6	0
		1365	0
		1366.4	0
		1367.8	0
		1369.2	0
		1370.6	0
		1372	0
		1373.4	0
		1374.8	0
		1376.2	0
		1377.6	0
		1379	0
		1380.4	1.50387e-08
		1381.8	2.57763e-08
		1383.2	4.35305e-08
		1384.6	7.2432e-08
		1386	1.18749e-07
		1387.4	1.91821e-07
		1388.8	3.05298e-07
		1390.2	4.78757e-07
		1391.6	7.39724e-07
		1393	1.12613e-06
		1394.4	1.68916e-06
		1395.8	2.49641e-06
		1397.2	3.63518e-06
		1398.6	5.21553e-06
		1400	7.37285e-06
		1401.4	1.02692e-05
		1402.8	1.40929e-05
		1404.2	1.90558e-05
		1405.6	2.53873e-05
		1407	3.33251e-05
		1408.4	4.31012e-05
		1409.8	5.49251e-05
		1411.2	6.8963e-05
		1412.6	8.53149e-05
		1414	0.000103991
		1415.4	0.000124891
		1416.8	0.000147786
		1418.2	0.000172304
		1419.6	0.000197935
		1421	0.000224033
		1422.4	0.000249842
		1423.8	0.000274542
		1425.2	0.000297239
		1426.6	0.000317086
		1428	0.000333294
		1429.4	0.000345198
		1430.8	0.000352301
		1432.2	0.000354314
		1433.6	0.000351183
		1435	0.000343093
		1436.4	0.000330462
		1437.8	0.000313923
		1439.2	0.00029428
		1440.6	0.000272474
		1442	0.000249522
		1443.4	0.000226478
		1444.8	0.000204374
		1446.2	0.000184186
		1447.6	0.000166792
		1449	0.000152949
		1450.4	0.000143263
		1451.8	0.000138177
		1453.2	0.000137957
		1454.6	0.000142678
		1456	0.000152219
		1457.4	0.00016626
		1458.8	0.000184277
		1460.2	0.000205554
		1461.6	0.000229198
		1463	0.000254167
		1464.4	0.000279312
		1465.8	0.000303429
		1467.2	0.000325319
		1468.6	0.00034386
		1470	0.000358073
		1471.4	0.000367183
		1472.8	0.00037067
		1474.2	0.000368303
		1475.6	0.00036015
		1477	0.000346568
		1478.4	0.00032817
		1479.8	0.000305773
		1481.2	0.000280337
		1482.6	0.000252895
		1484	0.000224476
		1485.4	0.000196044
		1486.8	0.000168472
		1488.2	0.000142451
		1489.6	0.000118514
		1491	9.70153e-05
		1492.4	7.81402e-05
		1493.8	6.19262e-05
		1495.2	4.8288e-05
		1496.6	3.70484e-05
		1498	2.79682e-05
		1499.4	2.07742e-05
		1500.8	1.51827e-05
		1502.2	1.09179e-05
		1503.6	7.72495e-06
		1505	5.37795e-06
		1506.4	3.68385e-06
		1507.8	2.48287e-06
		1509.2	1.64653e-06
		1510.6	1.07436e-06
		1512	6.89759e-07
		1513.4	4.35722e-07
		1514.8	2.70823e-07
		1516.2	1.65626e-07
		1517.6	9.96633e-08
		1519	5.90075e-08
		1520.4	4.52148e-08
		1521.8	3.80098e-08
		1523.2	4.16102e-08
		1524.6	5.01218e-08
		1526	8.12597e-08
		1527.4	1.29961e-07
		1528.8	2.0504e-07
		1530.2	3.1912e-07
		1531.6	4.89956e-07
		1533	7.42079e-07
		1534.4	1.10874e-06
		1535.8	1.63419e-06
		1537.2	2.37608e-06
		1538.6	3.40806e-06
		1540	4.82219e-06
		1541.4	6.73084e-06
		1542.8	9.26794e-06
		1544.2	1.25888e-05
		1545.6	1.68685e-05
		1547	2.22976e-05
		1548.4	2.90755e-05
		1549.8	3.74011e-05
		1551.2	4.74603e-05
		1552.6	5.94109e-05
		1554	7.33652e-05
		1555.4	8.93723e-05
		1556.8	0.0001074
		1558.2	0.00012732
		1559.6	0.000148893
		1561	0.000171768
		1562.4	0.000195478
		1563.8	0.000219454
		1565.2	0.00024304
		1566.6	0.000265523
		1568	0.000286163
		1569.4	0.000304238
		1570.8	0.000319083
		1572.2	0.000330127
		1573.6	0.000336937
		1575	0.000339237
		1576.4	0.000336937
		1577.8	0.000330127
		1579.2	0.000319083
		1580.6	0.000304238
		1582	0.000286163
		1583.4	0.000265523
		1584.8	0.00024304
		1586.2	0.000219454
		1587.6	0.000195478
		1589	0.000171768
		1590.4	0.000148893
		1591.8	0.00012732
		1593.2	0.0001074
		1594.6	8.93723e-05
		1596	7.33652e-05
		1597.4	5.94109e-05
		1598.8	4.74603e-05
		1600.2	3.74011e-05
		1601.6	2.90755e-05
		1603	2.22976e-05
		1604.4	1.68685e-05
		1605.8	1.26037e-05
		1607.2	9.29573e-06
		1608.6	6.79401e-06
		1610	4.93363e-06
		1611.4	3.60131e-06
		1612.8	2.70533e-06
		1614.2	2.18524e-06
		1615.6	2.01451e-06
		1617	2.204e-06
		1618.4	2.80662e-06
		1619.8	3.92308e-06
		1621.2	5.70851e-06
		1622.6	8.37899e-06
		1624	1.22167e-05
		1625.4	1.75721e-05
		1626.8	2.48604e-05
		1628.2	3.45511e-05
		1629.6	4.71479e-05
		1631	6.3151e-05
		1632.4	8.30438e-05
		1633.8	0.000107195
		1635.2	0.000135836
		1636.6	0.000169
		1638	0.000206477
		1639.4	0.00024774
		1640.8	0.000291991
		1642.2	0.000338141
		1643.6	0.000384861
		1645	0.000430659
		1646.4	0.000473978
		1647.8	0.000513303
		1649.2	0.00054728
		1650.6	0.00057481
		1652	0.000595131
		1653.4	0.00060786
		1654.8	0.000612995
		1656.2	0.000610891
		1657.6	0.000602194
		1659	0.000587763
		1660.4	0.000568576
		1661.8	0.000545647
		1663.2	0.00051995
		1664.6	0.000492368
		1666	0.000463676
		1667.4	0.000434489
		1668.8	0.000405332
		1670.2	0.000376627
		1671.6	0.00034873
		1673	0.000321957
		1674.4	0.000296602
		1675.8	0.000272958
		1677.2	0.000251311
		1678.6	0.000231946
		1680	0.000215132
		1681.4	0.000201114
		1682.8	0.000190099
		1684.2	0.000182249
		1685.6	0.000177672
		1687	0.000176422
		1688.4	0.000178501
		1689.8	0.000183859
		1691.2	0.000192405
		1692.6	0.000204011
		1694	0.000218513
		1695.4	0.000235719
		1696.8	0.000255416
		1698.2	0.000277323
		1699.6	0.000301163
		1701	0.000326577
		1702.4	0.000353162
		1703.8	0.00038045
		1705.2	0.000407907
		1706.6	0.000434936
		1708	0.000460883
		1709.4	0.000485055
		1710.8	0.000506741
		1712.2	0.000525243
		1713.6	0.000539912
		1715	0.000550183
		1716.4	0.000555615
		1717.8	0.000555922
		1719.2	0.000551002
		1720.6	0.000540954
		1722	0.000526072
		1723.4	0.000506885
		1724.8	0.00048406
		1726.2	0.00045843
		1727.6	0.000430933
		1729	0.000402569
		1730.4	0.000374345
		1731.8	0.000347227
		1733.2	0.000322097
		1734.6	0.000299707
		1736	0.000280652
		1737.4	0.000265347
		1738.8	0.000254017
		1740.2	0.000246696
		1741.6	0.000243232
		1743	0.000243312
		1744.4	0.000246476
		1745.8	0.000252149
		1747.2	0.000259675
		1748.6	0.000268345
		1750	0.000277434
		1751.4	0.000286234
		1752.8	0.00029408
		1754.2	0.000300381
		1755.6	0.00030464
		1757	0.000306469
		1758.4	0.000305621
		1759.8	0.000301936
		1761.2	0.000295412
		1762.6	0.000286159
		1764	0.000274409
		1765.4	0.00026046
		1766.8	0.000244688
		1768.2	0.000227533
		1769.6	0.000209462
		1771	0.000190953
		1772.4	0.000172481
		1773.8	0.000154501
		1775.2	0.000137432
		1776.6	0.00012169
		1778	0.000107625
		1779.4	9.55679e-05
		1780.8	8.5829e-05
		1782.2	7.86942e-05
		1783.6	7.44676e-05
		1785	7.34272e-05
		1786.4	7.58693e-05
		1787.8	8.21e-05
		1789.2	9.24321e-05
		1790.6	0.000107177
		1792	0.000126632
		1793.4	0.000151057
		1794.8	0.000180649
		1796.2	0.000215516
		1797.6	0.000255641
		1799	0.000300853
		1800.4	0.000350797
		1801.8	0.00040491
		1803.2	0.000462413
		1804.6	0.000522307
		1806	0.000583383
		1807.4	0.000644255
		1808.8	0.000703399
		1810.2	0.000759209
		1811.6	0.000810067
		1813	0.000854415
		1814.4	0.000890832
		1815.8	0.000918108
		1817.2	0.000935309
		1818.6	0.000941832
		1820	0.000937425
		1821.4	0.000922245
		1822.8	0.000896788
		1824.2	0.000861902
		1825.6	0.000818735
		1827	0.000768665
		1828.4	0.000713231
		1829.8	0.000654054
		1831.2	0.000592759
		1832.6	0.000530901
		1834	0.000469907
		1835.4	0.000411019
		1836.8	0.000355266
		1838.2	0.000303445
		1839.6	0.000256111
		1841	0.000213595
		1842.4	0.000176019
		1843.8	0.000143325
		1845.2	0.000115312
		1846.6	9.16643e-05
		1848	7.1994e-05
		1849.4	5.58667e-05
		1850.8	4.28314e-05
		1852.2	3.24426e-05
		1853.6	2.42776e-05
		1855	1.79484e-05
		1856.4	1.31089e-05
		1857.8	9.45849e-06
		1859.2	6.74195e-06
		1860.6	4.74735e-06
		1862	3.30227e-06
		1863.4	2.26915e-06
		1864.8	1.54027e-06
		1866.2	1.04504e-06
		1867.6	7.06348e-07
		1869	4.87375e-07
		1870.4	3.5913e-07
		1871.8	2.97731e-07
		1873.2	3.16141e-07
		1874.6	4.09566e-07
		1876	5.98281e-07
		1877.4	9.0916e-07
		1878.8	1.41705e-06
		1880.2	2.1795e-06
		1881.6	3.34302e-06
		1883	5.02245e-06
		1884.4	7.42951e-06
		1885.8	1.08306e-05
		1887.2	1.55758e-05
		1888.6	2.21244e-05
		1890	3.10774e-05
		1891.4	4.32164e-05
		1892.8	5.95424e-05
		1894.2	8.13012e-05
		1895.6	0.000109975
		1897	0.000147209
		1898.4	0.000194643
		1899.8	0.000253635
		1901.2	0.00032487
		1902.6	0.000407916
		1904	0.000500807
		1905.4	0.000599786
		1906.8	0.000699332
		1908.2	0.000792552
		1909.6	0.000871953
		1911	0.000930485
		1912.4	0.000962642
		1913.8	0.000965394
		1915.2	0.000938702
		1916.6	0.000885505
		1918	0.00081117
		1919.4	0.00072256
		1920.8	0.000626942
		1922.2	0.000530986
		1923.6	0.000440037
		1925	0.000357758
		1926.4	0.000286121
		1927.8	0.000225673
		1929.2	0.000175924
		1930.6	0.000135763
		1932	0.000103811
		1933.4	7.86672e-05
		1934.8	5.90524e-05
		1936.2	4.38718e-05
		1937.6	3.22208e-05
		1939	2.33646e-05
		1940.4	1.67089e-05
		1941.8	1.17725e-05
		1943.2	8.16514e-06
		1944.6	5.57131e-06
		1946	3.72937e-06
		1947.4	2.46207e-06
		1948.8	1.59678e-06
		1950.2	1.01734e-06
		1951.6	6.3675e-07
		1953	3.91516e-07
		1954.4	2.36489e-07
		1955.8	1.4033e-07
		1957.2	8.18029e-08
		1958.6	4.68454e-08
		1960	2.63539e-08
		1961.4	1.45647e-08
		1962.8	0
		1964.2	0
		1965.6	0
		1967	0
		1968.4	0
		1969.8	0
		1971.2	0
		1972.6	0
		1974	0
		1975.4	0
		1976.8	0
		1978.2	0
		1979.6	0
		1981	0
		1982.4	0
		1983.8	0
		1985.2	0
		1986.6	0
		1988	0
		1989.4	0
		1990.8	0
		1992.2	0
		1993.6	0
		1995	0
		1996.4	0
		1997.8	0
		1999.2	0
		2000.6	0
		2002	0
		2003.4	0
		2004.8	0
		2006.2	0
		2007.6	0
		2009	0
		2010.4	0
		2011.8	0
		2013.2	0
		2014.6	0
		2016	0
		2017.4	0
		2018.8	0
		2020.2	0
		2021.6	0
		2023	0
		2024.4	0
		2025.8	0
		2027.2	0
		2028.6	0
		2030	0
		2031.4	0
		2032.8	0
		2034.2	0
		2035.6	0
		2037	0
		2038.4	0
		2039.8	0
		2041.2	0
		2042.6	0
		2044	0
		2045.4	1.50548e-08
		2046.8	2.20643e-08
		2048.2	3.20908e-08
		2049.6	4.63177e-08
		2051	6.63418e-08
		2052.4	9.42981e-08
		2053.8	1.33013e-07
		2055.2	1.86191e-07
		2056.6	2.58642e-07
		2058	3.56545e-07
		2059.4	4.87758e-07
		2060.8	6.62171e-07
		2062.2	8.92093e-07
		2063.6	1.19268e-06
		2065	1.5824e-06
		2066.4	2.08344e-06
		2067.8	2.7222e-06
		2069.2	3.52967e-06
		2070.6	4.54176e-06
		2072	5.79948e-06
		2073.4	7.349e-06
		2074.8	9.24151e-06
		2076.2	1.15327e-05
		2077.6	1.42823e-05
		2079	1.75524e-05
		2080.4	2.14067e-05
		2081.8	2.59083e-05
		2083.2	3.11174e-05
		2084.6	3.70888e-05
		2086	4.38689e-05
		2087.4	5.14927e-05
		2088.8	5.99804e-05
		2090.2	6.93343e-05
		2091.6	7.95357e-05
		2093	9.05421e-05
		2094.4	0.000102286
		2095.8	0.000114671
		2097.2	0.000127575
		2098.6	0.000140849
		2100	0.000154318
		2101.4	0.000167786
		2102.8	0.000181038
		2104.2	0.000193846
		2105.6	0.000205978
		2107	0.000217199
		2108.4	0.000227285
		2109.8	0.000236026
		2111.2	0.000243233
		2112.6	0.000248748
		2114	0.000252448
		2115.4	0.000254249
		2116.8	0.00025411
		2118.2	0.000252034
		2119.6	0.000248069
		2121	0.000242303
		2122.4	0.000234867
		2123.8	0.000225922
		2125.2	0.000215661
		2126.6	0.000204295
		2128	0.000192052
		2129.4	0.000179166
		2130.8	0.00016587
		2132.2	0.00015239
		2133.6	0.000138937
		2135	0.000125705
		2136.4	0.000112866
		2137.8	0.000100566
		2139.2	8.89227e-05
		2140.6	7.80278e-05
		2142	6.79455e-05
		2143.4	5.87147e-05
		2144.8	5.0351e-05
		2146.2	4.28493e-05
		2147.6	3.61872e-05
		2149	3.03278e-05
		2150.4	2.52233e-05
		2151.8	2.08179e-05
		2153.2	1.70509e-05
		2154.6	1.38591e-05
		2156	1.11788e-05
		2157.4	8.94809e-06
		2158.8	7.10789e-06
		2160.2	5.60307e-06
		2161.6	4.38315e-06
		2163	3.40269e-06
		2164.4	2.62139e-06
		2165.8	2.00409e-06
		2167.2	1.52047e-06
		2168.6	1.14475e-06
		2170	8.55307e-07
		2171.4	6.34172e-07
		2172.8	4.66624e-07
		2174.2	3.40723e-07
		2175.6	2.46894e-07
		2177	1.7754e-07
		2178.4	1.26694e-07
		2179.8	8.97201e-08
		2181.2	6.30521e-08
		2182.6	4.39728e-08
		2184	3.04329e-08
		2185.4	2.09015e-08
		2186.8	1.42458e-08
		2188.2	0
		2189.6	0
		2191	0
		2192.4	0
		2193.8	0
		2195.2	0
		2196.6	0
		2198	0
		2199.4	0
		2200.8	0
		2202.2	0
		2203.6	0
		2205	0
		2206.4	0
		2207.8	0
		2209.2	0
		2210.6	0
		2212	0
		2213.4	0
		2214.8	0
		2216.2	0
		2217.6	0
		2219	0
		2220.4	0
		2221.8	0
		2223.2	0
		2224.6	0
		2226	0
		2227.4	0
		2228.8	0
		2230.2	0
		2231.6	0
		2233	0
		2234.4	0
		2235.8	0
		2237.2	0
		2238.6	0
		2240	0
		2241.4	0
		2242.8	0
		2244.2	0
		2245.6	0
		2247	0
		2248.4	0
		2249.8	0
		2251.2	0
		2252.6	0
		2254	0
		2255.4	0
		2256.8	0
		2258.2	0
		2259.6	0
		2261	0
		2262.4	0
		2263.8	0
		2265.2	0
		2266.6	0
		2268	0
		2269.4	0
		2270.8	0
		2272.2	0
		2273.6	0
		2275	0
		2276.4	0
		2277.8	0
		2279.2	0
		2280.6	0
		2282	0
		2283.4	0
		2284.8	0
		2286.2	0
		2287.6	0
		2289	0
		2290.4	0
		2291.8	0
		2293.2	0
		2294.6	0
		2296	0
		2297.4	0
		2298.8	0
		2300.2	0
		2301.6	0
		2303	0
		2304.4	0
		2305.8	0
		2307.2	0
		2308.6	0
		2310	0
		2311.4	0
		2312.8	0
		2314.2	0
		2315.6	0
		2317	0
		2318.4	0
		2319.8	0
		2321.2	0
		2322.6	0
		2324	0
		2325.4	0
		2326.8	0
		2328.2	0
		2329.6	0
		2331	0
		2332.4	0
		2333.8	0
		2335.2	0
		2336.6	0
		2338	0
		2339.4	0
		2340.8	0
		2342.2	0
		2343.6	0
		2345	0
		2346.4	0
		2347.8	0
		2349.2	0
		2350.6	0
		2352	0
		2353.4	0
		2354.8	0
		2356.2	0
		2357.6	0
		2359	0
		2360.4	0
		2361.8	0
		2363.2	0
		2364.6	0
		2366	0
		2367.4	0
		2368.8	0
		2370.2	0
		2371.6	0
		2373	0
		2374.4	0
		2375.8	0
		2377.2	0
		2378.6	0
		2380	0
		2381.4	0
		2382.8	0
		2384.2	0
		2385.6	1.20591e-08
		2387	1.77513e-08
		2388.4	2.59312e-08
		2389.8	3.75913e-08
		2391.2	5.4079e-08
		2392.6	7.72047e-08
		2394	1.09379e-07
		2395.4	1.5378e-07
		2396.8	2.14556e-07
		2398.2	2.97068e-07
		2399.6	4.08175e-07
		2401	5.56559e-07
		2402.4	7.53098e-07
		2403.8	1.01127e-06
		2405.2	1.34759e-06
		2406.6	1.78206e-06
		2408	2.33863e-06
		2409.4	3.04562e-06
		2410.8	3.9361e-06
		2412.2	5.04813e-06
		2413.6	6.42496e-06
		2415	8.11493e-06
		2416.4	1.01712e-05
		2417.8	1.26514e-05
		2419.2	1.56163e-05
		2420.6	1.9129e-05
		2422	2.32531e-05
		2423.4	2.80508e-05
		2424.8	3.35803e-05
		2426.2	3.98932e-05
		2427.6	4.70314e-05
		2429	5.50239e-05
		2430.4	6.38964e-05
		2431.8	7.36246e-05
		2433.2	8.4189e-05
		2434.6	9.55386e-05
		2436	0.000107596
		2437.4	0.00012026
		2438.8	0.000133399
		2440.2	0.000146863
		2441.6	0.000160476
		2443	0.000174047
		2444.4	0.000187375
		2445.8	0.000200251
		2447.2	0.000212473
		2448.6	0.000223848
		2450	0.000234203
		2451.4	0.000243394
		2452.8	0.000251316
		2454.2	0.000257904
		2455.6	0.000263144
		2457	0.000267075
		2458.4	0.00026979
		2459.8	0.000271432
		2461.2	0.000272191
		2462.6	0.0002723
		2464	0.000272017
		2465.4	0.00027162
		2466.8	0.000271386
		2468.2	0.000271581
		2469.6	0.000272437
		2471	0.000274142
		2472.4	0.000276823
		2473.8	0.000280534
		2475.2	0.000285252
		2476.6	0.000290866
		2478	0.000297188
		2479.4	0.000303951
		2480.8	0.000310825
		2482.2	0.000317432
		2483.6	0.000323365
		2485	0.00032821
		2486.4	0.000331569
		2487.8	0.000333095
		2489.2	0.000332473
		2490.6	0.000329487
		2492	0.000324007
		2493.4	0.000315997
		2494.8	0.000305522
		2496.2	0.00029274
		2497.6	0.000277896
		2499	0.000261306
		2500.4	0.00024334
		2501.8	0.000224405
		2503.2	0.000204921
		2504.6	0.000185308
		2506	0.000165964
		2507.4	0.000147251
		2508.8	0.000129489
		2510.2	0.000112941
		2511.6	9.78188e-05
		2513	8.42764e-05
		2514.4	7.24166e-05
		2515.8	6.22957e-05
		2517.2	5.39309e-05
		2518.6	4.73085e-05
		2520	4.23917e-05
		2521.4	3.91288e-05
		2522.8	3.74592e-05
		2524.2	3.73191e-05
		2525.6	3.86448e-05
		2527	4.13751e-05
		2528.4	4.54514e-05
		2529.8	5.08088e-05
		2531.2	5.7409e-05
		2532.6	6.51797e-05
		2534	7.40532e-05
		2535.4	8.39513e-05
		2536.8	9.47809e-05
		2538.2	0.000106432
		2539.6	0.000118773
		2541	0.000131654
		2542.4	0.0001449
		2543.8	0.000158319
		2545.2	0.000171699
		2546.6	0.000184815
		2548	0.000197432
		2549.4	0.000209313
		2550.8	0.000220223
		2552.2	0.000229939
		2553.6	0.000238249
		2555	0.000244987
		2556.4	0.000249995
		2557.8	0.000253159
		2559.2	0.000254408
		2560.6	0.000253713
		2562	0.000251091
		2563.4	0.0002466
		2564.8	0.000240342
		2566.2	0.000232457
		2567.6	0.000223116
		2569	0.000212516
		2570.4	0.000200876
		2571.8	0.000188426
		2573.2	0.000175399
		2574.6	0.000162028
		2576	0.000148534
		2577.4	0.000135126
		2578.8	0.00012199
		2580.2	0.000109291
		2581.6	9.71678e-05
		2583	8.57302e-05
		2584.4	7.5062e-05
		2585.8	6.52201e-05
		2587.2	5.62364e-05
		2588.6	4.81204e-05
		2590	4.08616e-05
		2591.4	3.44331e-05
		2592.8	2.87947e-05
		2594.2	2.38959e-05
		2595.6	1.96793e-05
		2597	1.60831e-05
		2598.4	1.30438e-05
		2599.8	1.04982e-05
		2601.2	8.38496e-06
		2602.6	6.64602e-06
		2604	5.22754e-06
		2605.4	4.08044e-06
		2606.8	3.16077e-06
		2608.2	2.4297e-06
		2609.6	1.85348e-06
		2611	1.40313e-06
		2612.4	1.0541e-06
		2613.8	7.85856e-07
		2615.2	5.81404e-07
		2616.6	4.26862e-07
		2618	3.11008e-07
		2619.4	2.2487e-07
		2620.8	1.61349e-07
		2622.2	1.14888e-07
		2623.6	8.11821e-08
		2625	5.69272e-08
		2626.4	5.05018e-08
		2627.8	4.22939e-08
		2629.2	3.91362e-08
		2630.6	4.04359e-08
		2632	3.74022e-08
		2633.4	5.02684e-08
		2634.8	6.72132e-08
		2636.2	8.94078e-08
		2637.6	1.1832e-07
		2639	1.55776e-07
		2640.4	2.04036e-07
		2641.8	2.65873e-07
		2643.2	3.44669e-07
		2644.6	4.4452e-07
		2646	5.70351e-07
		2647.4	7.28039e-07
		2648.8	9.24546e-07
		2650.2	1.16806e-06
		2651.6	1.46812e-06
		2653	1.83577e-06
		2654.4	2.28369e-06
		2655.8	2.8263e-06
		2657.2	3.47986e-06
		2658.6	4.26251e-06
		2660	5.19434e-06
		2661.4	6.29734e-06
		2662.8	7.5953e-06
		2664.2	9.1137e-06
		2665.6	1.08794e-05
		2667	1.29205e-05
		2668.4	1.52655e-05
		2669.8	1.79435e-05
		2671.2	2.09828e-05
		2672.6	2.44108e-05
		2674	2.82528e-05
		2675.4	3.25314e-05
		2676.8	3.72653e-05
		2678.2	4.24687e-05
		2679.6	4.81497e-05
		2681	5.43101e-05
		2682.4	6.09436e-05
		2683.8	6.80359e-05
		2685.2	7.5563e-05
		2686.6	8.34913e-05
		2688	9.17773e-05
		2689.4	0.000100367
		2690.8	0.000109196
		2692.2	0.000118191
		2693.6	0.00012727
		2695	0.000136341
		2696.4	0.000145307
		2697.8	0.000154068
		2699.2	0.000162516
		2700.6	0.000170547
		2702	0.000178054
		2703.4	0.000184936
		2704.8	0.000191096
		2706.2	0.000196447
		2707.6	0.000200908
		2709	0.000204415
		2710.4	0.000206914
		2711.8	0.000208367
		2713.2	0.00020875
		2714.6	0.00020806
		2716	0.000206305
		2717.4	0.000203514
		2718.8	0.000199728
		2720.2	0.000195005
		2721.6	0.000189415
		2723	0.000183039
		2724.4	0.000175968
		2725.8	0.000168301
		2727.2	0.00016014
		2728.6	0.000151592
		2730	0.000142762
		2731.4	0.000133755
		2732.8	0.000124672
		2734.2	0.000115609
		2735.6	0.000106653
		2737	9.78852e-05
		2738.4	8.93763e-05
		2739.8	8.11875e-05
		2741.2	7.33698e-05
		2742.6	6.59639e-05
		2744	5.90007e-05
		2745.4	5.25013e-05
		2746.8	4.64776e-05
		2748.2	4.09335e-05
		2749.6	3.58654e-05
		2751	3.12632e-05
		2752.4	2.71115e-05
		2753.8	2.33902e-05
		2755.2	2.00759e-05
		2756.6	1.71427e-05
		2758	1.45628e-05
		2759.4	1.23075e-05
		2760.8	1.03481e-05
		2762.2	8.65584e-06
		2763.6	7.20311e-06
		2765	5.96338e-06
		2766.4	4.91163e-06
		2767.8	4.02458e-06
		2769.2	3.28078e-06
		2770.6	2.6607e-06
		2772	2.14672e-06
		2773.4	1.72312e-06
		2774.8	1.376e-06
		2776.2	1.09316e-06
		2777.6	8.63987e-07
		2779	6.7935e-07
		2780.4	5.31425e-07
		2781.8	4.13572e-07
		2783.2	3.20201e-07
		2784.6	2.46635e-07
		2786	1.88994e-07
		2787.4	1.4408e-07
		2788.8	1.09275e-07
		2790.2	8.24514e-08
		2791.6	6.18924e-08
		2793	4.62209e-08
		2794.4	3.434e-08
		2795.8	2.53819e-08
		2797.2	1.86642e-08
		2798.6	1.36539e-08
[truncated: 1 more rows]

## Sheet: PlotDat6
Source sheet	Sheet3	0	0	87.5	0	0	0
Plot name	ProbDens4	1.75	0	175	0	3498.25	0
Plot Type	16	3.5	0	175	1
1st free col	9	5.25	0	87.5	1
Sigma Level	2	7	0	87.5	0
Absolute Errs	TRUE	8.75	0	ErrBox	ErrBox
Symbol Type	1	10.5	0	175	0
Inverse Plot	FALSE	12.25	0	262.5	0
Color Plot	TRUE	14	0	262.5	5
3D plot	FALSE	15.75	0	175	5
Linear	FALSE	17.5	0	175	0
Data Range	G1:H112	19.25	0	ErrBox	ErrBox
Filled Symbols	FALSE	21	0	262.5	0
ConcAge	FALSE	22.75	0	350	0
ConcSwap	FALSE	24.5	0	350	9
1st Symbol-row	1	26.25	0	262.5	9
		28	0	262.5	0
		29.75	0	ErrBox	ErrBox
		31.5	0	350	0
		33.25	0	437.5	0
		35	0	437.5	14
		36.75	0	350	14
		38.5	0	350	0
		40.25	0	ErrBox	ErrBox
		42	0	437.5	0
		43.75	0	525	0
		45.5	0	525	18
		47.25	0	437.5	18
		49	0	437.5	0
		50.75	0	ErrBox	ErrBox
		52.5	0	525	0
		54.25	0	612.5	0
		56	0	612.5	1
		57.75	0	525	1
		59.5	0	525	0
		61.25	0	ErrBox	ErrBox
		63	0	700	0
		64.75	0	787.5	0
		66.5	0	787.5	8
		68.25	0	700	8
		70	0	700	0
		71.75	0	ErrBox	ErrBox
		73.5	0	787.5	0
		75.25	0	875	0
		77	0	875	6
		78.75	0	787.5	6
		80.5	0	787.5	0
		82.25	0	ErrBox	ErrBox
		84	0	875	0
		85.75	0	962.5	0
		87.5	0	962.5	3
		89.25	0	875	3
		91	0	875	0
		92.75	0	ErrBox	ErrBox
		94.5	0	962.5	0
		96.25	0	1050	0
		98	0	1050	2
		99.75	0	962.5	2
		101.5	0	962.5	0
		103.25	0	ErrBox	ErrBox
		105	0	1050	0
		106.75	0	1137.5	0
		108.5	0	1137.5	1
		110.25	0	1050	1
		112	0	1050	0
		113.75	0	ErrBox	ErrBox
		115.5	0	1137.5	0
		117.25	0	1225	0
		119	0	1225	1
		120.75	0	1137.5	1
		122.5	0	1137.5	0
		124.25	0	ErrBox	ErrBox
		126	0	1312.5	0
		127.75	2.99912e-07	1400	0
		129.5	4.50482e-05	1400	1
		131.25	0.000953112	1312.5	1
		133	0.00284049	1312.5	0
		134.75	0.00119241	ErrBox	ErrBox
		136.5	7.05085e-05	1400	0
		138.25	5.87272e-07	1487.5	0
		140	0	1487.5	1
		141.75	0	1400	1
		143.5	0	1400	0
		145.25	0	ErrBox	ErrBox
		147	0	1662.5	0
		148.75	0	1750	0
		150.5	0	1750	1
		152.25	0	1662.5	1
		154	0	1662.5	0
		155.75	0	ErrBox	ErrBox
		157.5	0	1750	0
		159.25	0	1837.5	0
		161	0	1837.5	6
		162.75	0	1750	6
		164.5	0	1750	0
		166.25	0	ErrBox	ErrBox
		168	0	1837.5	0
		169.75	0	1925	0
		171.5	0	1925	18
		173.25	0	1837.5	18
		175	0	1837.5	0
		176.75	0	ErrBox	ErrBox
		178.5	0	1925	0
		180.25	0	2012.5	0
		182	0	2012.5	3
		183.75	0	1925	3
		185.5	0	1925	0
		187.25	0	ErrBox	ErrBox
		189	0	2012.5	0
		190.75	0	2100	0
		192.5	0	2100	1
		194.25	0	2012.5	1
		196	0	2012.5	0
		197.75	0	ErrBox	ErrBox
		199.5	0	2275	0
		201.25	0	2362.5	0
		203	0	2362.5	3
		204.75	0	2275	3
		206.5	0	2275	0
		208.25	0	ErrBox	ErrBox
		210	0	2362.5	0
		211.75	0	2450	0
		213.5	0	2450	2
		215.25	0	2362.5	2
		217	0	2362.5	0
		218.75	0	ErrBox	ErrBox
		220.5	1.29603e-08	2450	0
		222.25	5.04366e-06	2537.5	0
		224	0.000276478	2537.5	5
		225.75	0.00213481	2450	5
		227.5	0.00232188	2450	0
		229.25	0.000355716	ErrBox	ErrBox
		231	7.67626e-06	2625	0
		232.75	2.33334e-08	2712.5	0
		234.5	0	2712.5	1
		236.25	0	2625	1
		238	0	2625	0
		239.75	0	ErrBox	ErrBox
		241.5	0	3150	0
		243.25	0	3237.5	0
		245	0	3237.5	1
		246.75	0	3150	1
		248.5	0	3150	0
		250.25	0	ErrBox	ErrBox
		252	2.30449e-07
		253.75	5.88145e-06
		255.5	8.7902e-05
		257.25	0.000753105
		259	0.00329165
		260.75	0.00702567
		262.5	0.00771706
		264.25	0.0047385
		266	0.00185762
		267.75	0.00126719
		269.5	0.00267258
		271.25	0.00421507
		273	0.00379601
		274.75	0.00219498
		276.5	0.000898258
		278.25	0.00024742
		280	4.25705e-05
		281.75	4.73336e-06
		283.5	3.27741e-06
		285.25	2.09635e-05
		287	0.000100757
		288.75	0.000334388
		290.5	0.000777676
		292.25	0.00131704
		294	0.00174774
		295.75	0.00195324
		297.5	0.00181305
		299.25	0.00127216
		301	0.000618379
		302.75	0.000200489
		304.5	7.71935e-05
		306.25	0.000300466
		308	0.00118509
		309.75	0.0024943
		311.5	0.0030035
		313.25	0.00214243
		315	0.000853601
		316.75	0.00017435
		318.5	1.72711e-05
		320.25	8.04219e-07
		322	1.76844e-08
		323.75	0
		325.5	0
		327.25	5.26454e-08
		329	4.28379e-07
		330.75	2.7147e-06
		332.5	1.3398e-05
		334.25	5.14977e-05
		336	0.000154156
		337.75	0.000359385
		339.5	0.000652508
		341.25	0.000922652
		343	0.00101605
		344.75	0.000871407
		346.5	0.000582039
		348.25	0.000302768
		350	0.000122787
		351.75	4.03989e-05
		353.5	2.41648e-05
		355.25	8.48513e-05
		357	0.000309327
		358.75	0.000755793
		360.5	0.00121427
		362.25	0.00128348
		364	0.000913108
		365.75	0.000575604
		367.5	0.000774724
		369.25	0.00140199
		371	0.00165926
		372.75	0.00134268
		374.5	0.0011854
		376.25	0.00133037
		378	0.00124253
		379.75	0.000811308
		381.5	0.000432636
		383.25	0.000395716
		385	0.000670986
		386.75	0.00103062
		388.5	0.00120857
		390.25	0.00113777
		392	0.00102521
		393.75	0.0010676
		395.5	0.00120105
		397.25	0.00131568
		399	0.00166176
		400.75	0.00239702
		402.5	0.00282372
		404.25	0.00278087
		406	0.0026795
		407.75	0.00208243
		409.5	0.00113754
		411.25	0.000506555
		413	0.000247673
		414.75	0.000189319
		416.5	0.000281722
		418.25	0.000518062
		420	0.000841765
		421.75	0.00114653
		423.5	0.00138103
		425.25	0.0016819
		427	0.00234018
		428.75	0.00332359
		430.5	0.00392869
		432.25	0.00381736
		434	0.00369886
		435.75	0.00403004
		437.5	0.0043821
		439.25	0.00442069
		441	0.00461608
		442.75	0.00581017
		444.5	0.00791781
		446.25	0.00910711
		448	0.007935
		449.75	0.00535337
		451.5	0.00299523
		453.25	0.00158105
		455	0.00119328
		456.75	0.00156349
		458.5	0.00211348
		460.25	0.0022586
		462	0.0018437
		463.75	0.00125345
		465.5	0.0010694
		467.25	0.00148006
		469	0.00203916
		470.75	0.0022332
		472.5	0.00200933
		474.25	0.00166565
		476	0.00153925
		477.75	0.00152528
		479.5	0.00121821
		481.25	0.000661813
		483	0.000232323
		484.75	5.21611e-05
		486.5	8.82658e-06
		488.25	1.18928e-05
		490	6.12569e-05
		491.75	0.000229082
		493.5	0.000587972
		495.25	0.00103519
		497	0.00125111
		498.75	0.00104585
		500.5	0.000649116
		502.25	0.000464417
		504	0.000678539
		505.75	0.00113373
		507.5	0.00148948
		509.25	0.00161246
		511	0.00162663
		512.75	0.00150006
		514.5	0.0010966
		516.25	0.000571599
		518	0.000203188
		519.75	4.85175e-05
		521.5	7.74057e-06
		523.25	8.25003e-07
		525	5.86499e-08
		526.75	0
		528.5	0
		530.25	0
		532	0
		533.75	0
		535.5	0
		537.25	0
		539	0
		540.75	0
		542.5	0
		544.25	0
		546	0
		547.75	0
		549.5	0
		551.25	0
		553	0
		554.75	0
		556.5	0
		558.25	0
		560	0
		561.75	0
		563.5	0
		565.25	0
		567	0
		568.75	0
		570.5	0
		572.25	0
		574	0
		575.75	0
		577.5	0
		579.25	0
		581	0
		582.75	2.19558e-08
		584.5	7.11169e-08
		586.25	2.14248e-07
		588	6.00319e-07
		589.75	1.56447e-06
		591.5	3.79203e-06
		593.25	8.54863e-06
		595	1.79243e-05
		596.75	3.49548e-05
		598.5	6.34003e-05
		600.25	0.000106954
		602	0.000167812
		603.75	0.000244888
		605.5	0.000332378
		607.25	0.000419583
		609	0.000492633
		610.75	0.000537959
		612.5	0.00054638
		614.25	0.000516132
		616	0.000453468
		617.75	0.000370555
		619.5	0.00028163
		621.25	0.000199079
		623	0.000130885
		624.75	8.00345e-05
		626.5	4.5518e-05
		628.25	2.40774e-05
		630	1.18456e-05
		631.75	5.42029e-06
		633.5	2.3068e-06
		635.25	9.13095e-07
		637	3.36157e-07
		638.75	1.15104e-07
		640.5	3.6657e-08
		642.25	1.08578e-08
		644	0
		645.75	0
		647.5	0
		649.25	0
		651	0
		652.75	0
		654.5	0
		656.25	0
		658	0
		659.75	0
		661.5	0
		663.25	0
		665	0
		666.75	0
		668.5	0
		670.25	0
		672	0
		673.75	0
		675.5	0
		677.25	0
		679	0
		680.75	0
		682.5	0
		684.25	0
		686	0
		687.75	0
		689.5	0
		691.25	0
		693	0
		694.75	0
		696.5	0
		698.25	0
		700	0
		701.75	0
		703.5	0
		705.25	0
		707	0
		708.75	0
		710.5	0
		712.25	0
		714	2.76193e-08
		715.75	9.73935e-08
		717.5	3.15429e-07
		719.25	9.3827e-07
		721	2.56335e-06
		722.75	6.43198e-06
		724.5	1.4823e-05
		726.25	3.13748e-05
		728	6.09931e-05
		729.75	0.000108902
		731.5	0.000178585
		733.25	0.000268974
		735	0.000372075
		736.75	0.000472748
		738.5	0.000551714
		740.25	0.000591548
		742	0.000583205
		743.75	0.00053033
		745.5	0.000449441
		747.25	0.00036687
		749	0.000314194
		750.75	0.000323884
		752.5	0.000424646
		754.25	0.000635756
		756	0.000960045
		757.75	0.00137778
		759.5	0.00184452
		761.25	0.00229596
		763	0.00265953
		764.75	0.00286897
		766.5	0.00287929
		768.25	0.00268554
		770	0.0023415
		771.75	0.00195662
		773.5	0.00165462
		775.25	0.0015137
		777	0.00153157
		778.75	0.0016371
		780.5	0.00173459
		782.25	0.00175312
		784	0.00167741
		785.75	0.00154814
		787.5	0.00143488
		789.25	0.00139877
		791	0.00146233
		792.75	0.00159509
		794.5	0.00172055
		796.25	0.00174858
		798	0.00162322
		799.75	0.00135548
		801.5	0.00101443
		803.25	0.000684319
		805	0.000422674
		806.75	0.000246725
		808.5	0.000145495
		810.25	9.86794e-05
		812	8.86528e-05
		813.75	0.000103732
		815.5	0.000137013
		817.25	0.000184328
		819	0.000242994
		820.75	0.000311758
		822.5	0.000391591
		824.25	0.000486071
		826	0.000599496
		827.75	0.000731432
		829.5	0.000869583
		831.25	0.000986721
		833	0.0010473
		834.75	0.00102341
		836.5	0.000910828
		838.25	0.000733703
		840	0.000533627
		841.75	0.000350868
		843.5	0.00021001
		845.25	0.000117152
		847	6.67478e-05
		848.75	5.13122e-05
		850.5	6.82014e-05
		852.25	0.000120768
		854	0.000213615
		855.75	0.00034378
		857.5	0.000492703
		859.25	0.000625764
		861	0.000703481
		862.75	0.000699799
		864.5	0.000615977
		866.25	0.000479841
		868	0.000331025
		869.75	0.000202674
		871.5	0.000111004
		873.25	5.60224e-05
		875	2.89095e-05
		876.75	1.95156e-05
		878.5	2.04055e-05
		880.25	2.75677e-05
		882	3.94747e-05
		883.75	5.5897e-05
		885.5	7.7043e-05
		887.25	0.000103046
		889	0.000133686
		890.75	0.000168204
		892.5	0.000205253
		894.25	0.000242907
		896	0.000278799
		897.75	0.000310343
		899.5	0.000335037
		901.25	0.000350787
		903	0.0003562
		904.75	0.000350787
		906.5	0.000335037
		908.25	0.000310364
		910	0.000278905
		911.75	0.000243374
		913.5	0.000207051
		915.25	0.000174245
		917	0.000151407
		918.75	0.000148433
		920.5	0.000178521
		922.25	0.000253977
		924	0.000376968
		925.75	0.000529321
		927.5	0.000670642
		929.25	0.000752067
		931	0.000740849
		932.75	0.000639483
		934.5	0.000484462
		936.25	0.00032634
		938	0.000207338
		939.75	0.000151347
		941.5	0.000167113
		943.25	0.000254028
		945	0.000401406
		946.75	0.000582692
		948.5	0.000755021
		950.25	0.000872206
		952	0.000906594
		953.75	0.000864104
		955.5	0.00078006
		957.25	0.000698638
		959	0.000651396
		960.75	0.000647977
		962.5	0.00068006
		964.25	0.000730741
		966	0.000781897
		967.75	0.000817585
		969.5	0.000825372
		971.25	0.000797646
		973	0.000733135
		974.75	0.00063757
		976.5	0.000522503
		978.25	0.000402261
		980	0.00029025
		981.75	0.000195944
		983.5	0.000123608
		985.25	7.28004e-05
		987	4.00072e-05
		988.75	2.0507e-05
		990.5	9.80289e-06
		992.25	4.3702e-06
		994	1.81731e-06
		995.75	7.05195e-07
		997.5	2.55516e-07
		999.25	8.65285e-08
		1001	2.27284e-08
		1002.75	0
		1004.5	0
		1006.25	0
		1008	0
		1009.75	0
		1011.5	0
		1013.25	0
		1015	0
		1016.75	0
		1018.5	0
		1020.25	0
		1022	0
		1023.75	0
		1025.5	0
		1027.25	0
		1029	0
		1030.75	0
		1032.5	0
		1034.25	0
		1036	0
		1037.75	0
		1039.5	0
		1041.25	0
		1043	0
		1044.75	0
		1046.5	0
		1048.25	0
		1050	0
		1051.75	0
		1053.5	0
		1055.25	0
		1057	0
		1058.75	0
		1060.5	0
		1062.25	0
		1064	0
		1065.75	0
		1067.5	2.20955e-08
		1069.25	6.09694e-08
		1071	1.59322e-07
		1072.75	3.94271e-07
		1074.5	9.23995e-07
		1076.25	2.05068e-06
		1078	4.31006e-06
		1079.75	8.57872e-06
		1081.5	1.61702e-05
		1083.25	2.88646e-05
		1085	4.87945e-05
		1086.75	7.81143e-05
		1088.5	0.000118426
		1090.25	0.000170026
		1092	0.000231175
		1093.75	0.00029766
		1095.5	0.000362957
		1097.25	0.000419127
		1099	0.000458343
		1100.75	0.000474669
		1102.5	0.000465528
		1104.25	0.000432371
		1106	0.000380296
		1107.75	0.000316769
		1109.5	0.000249873
		1111.25	0.000186659
		1113	0.000132049
		1114.75	8.84659e-05
		1116.5	5.6127e-05
		1118.25	3.37228e-05
		1120	1.9188e-05
		1121.75	1.03393e-05
		1123.5	5.27603e-06
		1125.25	2.54964e-06
		1127	1.16682e-06
		1128.75	5.05692e-07
		1130.5	2.0755e-07
		1132.25	8.06705e-08
		1134	2.96935e-08
		1135.75	1.03505e-08
		1137.5	1.58569e-08
		1139.25	3.73265e-08
		1141	8.46047e-08
		1142.75	1.84651e-07
		1144.5	3.88051e-07
		1146.25	7.85247e-07
		1148	1.53004e-06
		1149.75	2.87065e-06
		1151.5	5.18606e-06
		1153.25	9.02142e-06
		1155	1.51109e-05
		1156.75	2.43718e-05
		1158.5	3.78499e-05
		1160.25	5.66007e-05
		1162	8.15001e-05
		1163.75	0.000112999
		1165.5	0.000150859
		1167.25	0.000193931
		1169	0.000240051
		1170.75	0.000286114
		1172.5	0.000328364
		1174.25	0.00036287
		1176	0.000386125
		1177.75	0.000395625
		1179.5	0.000390318
		1181.25	0.000370796
		1183	0.00033918
		1184.75	0.000298748
		1186.5	0.000253373
		1188.25	0.000206917
		1190	0.000162709
		1191.75	0.000123199
		1193.5	8.98217e-05
		1195.25	6.30574e-05
		1197	4.26257e-05
		1198.75	2.77451e-05
		1200.5	1.73892e-05
		1202.25	1.04943e-05
		1204	6.09831e-06
		1205.75	3.41228e-06
		1207.5	1.83848e-06
		1209.25	9.5379e-07
		1211	4.7646e-07
		1212.75	2.29182e-07
		1214.5	1.06149e-07
		1216.25	4.73401e-08
		1218	2.03293e-08
		1219.75	0
		1221.5	0
		1223.25	0
		1225	0
		1226.75	0
		1228.5	0
		1230.25	0
		1232	0
		1233.75	0
		1235.5	0
		1237.25	0
		1239	0
		1240.75	0
		1242.5	0
		1244.25	0
		1246	0
		1247.75	0
		1249.5	0
		1251.25	0
		1253	0
		1254.75	0
		1256.5	0
		1258.25	0
		1260	0
		1261.75	0
		1263.5	0
		1265.25	0
		1267	0
		1268.75	0
		1270.5	0
		1272.25	0
		1274	0
		1275.75	0
		1277.5	0
		1279.25	0
		1281	0
		1282.75	0
		1284.5	0
		1286.25	0
		1288	0
		1289.75	0
		1291.5	0
		1293.25	0
		1295	0
		1296.75	0
		1298.5	0
		1300.25	0
		1302	0
		1303.75	0
		1305.5	0
		1307.25	0
		1309	0
		1310.75	0
		1312.5	0
		1314.25	0
		1316	0
		1317.75	0
		1319.5	0
		1321.25	0
		1323	0
		1324.75	0
		1326.5	0
		1328.25	0
		1330	0
		1331.75	0
		1333.5	0
		1335.25	0
		1337	0
		1338.75	0
		1340.5	0
		1342.25	0
		1344	0
		1345.75	0
		1347.5	0
		1349.25	0
		1351	0
		1352.75	1.25164e-08
		1354.5	3.83815e-08
		1356.25	1.10566e-07
		1358	2.9921e-07
		1359.75	7.60656e-07
		1361.5	1.81659e-06
		1363.25	4.07552e-06
		1365	8.58944e-06
		1366.75	1.7006e-05
		1368.5	3.163e-05
		1370.25	5.5265e-05
		1372	9.07108e-05
		1373.75	0.00013987
		1375.5	0.000202603
		1377.25	0.000275692
		1379	0.000352418
		1380.75	0.000423204
		1382.5	0.000477417
		1384.25	0.000505944
		1386	0.00050369
		1387.75	0.000471066
		1389.5	0.000413862
		1391.25	0.000341576
		1393	0.000264834
		1394.75	0.000192894
		1396.5	0.000131983
		1398.25	8.48353e-05
		1400	5.1226e-05
		1401.75	2.90577e-05
		1403.5	1.54842e-05
		1405.25	7.75126e-06
		1407	3.64512e-06
		1408.75	1.61031e-06
		1410.5	6.68287e-07
		1412.25	2.60539e-07
		1414	9.542e-08
		1415.75	3.28294e-08
		1417.5	1.06107e-08
		1419.25	0
		1421	0
		1422.75	0
		1424.5	0
		1426.25	0
		1428	0
		1429.75	0
		1431.5	0
		1433.25	0
		1435	0
		1436.75	0
		1438.5	0
		1440.25	0
		1442	0
		1443.75	0
		1445.5	0
		1447.25	0
		1449	0
		1450.75	0
		1452.5	1.20725e-08
		1454.25	3.4365e-08
		1456	9.26386e-08
		1457.75	2.36495e-07
		1459.5	5.71752e-07
		1461.25	1.30903e-06
		1463	2.83821e-06
		1464.75	5.82767e-06
		1466.5	1.13319e-05
		1468.25	2.08671e-05
		1470	3.63896e-05
		1471.75	6.00965e-05
		1473.5	9.39886e-05
		1475.25	0.000139205
		1477	0.000195251
		1478.75	0.000259349
		1480.5	0.000326235
		1482.25	0.000388626
		1484	0.000438418
		1485.75	0.000468382
		1487.5	0.000473878
		1489.25	0.000454034
		1491	0.00041197
		1492.75	0.000353996
		1494.5	0.000288061
		1496.25	0.000221987
		1498	0.000162003
		1499.75	0.000111964
		1501.5	7.32797e-05
		1503.25	4.54199e-05
		1505	2.66602e-05
		1506.75	1.48196e-05
		1508.5	7.80125e-06
		1510.25	3.88908e-06
		1512	1.83605e-06
		1513.75	8.20877e-07
		1515.5	3.47557e-07
		1517.25	1.39357e-07
		1519	5.2916e-08
		1520.75	1.90283e-08
		1522.5	0
		1524.25	0
		1526	0
		1527.75	0
		1529.5	0
		1531.25	0
		1533	0
		1534.75	0
		1536.5	0
		1538.25	0
		1540	0
		1541.75	0
		1543.5	0
		1545.25	0
		1547	0
		1548.75	0
		1550.5	0
		1552.25	0
		1554	0
		1555.75	0
		1557.5	0
		1559.25	0
		1561	0
		1562.75	0
		1564.5	0
		1566.25	0
		1568	0
		1569.75	0
		1571.5	0
		1573.25	0
		1575	0
		1576.75	0
		1578.5	0
		1580.25	0
		1582	0
		1583.75	0
		1585.5	0
		1587.25	0
		1589	0
		1590.75	0
		1592.5	0
		1594.25	0
		1596	0
		1597.75	0
		1599.5	0
		1601.25	0
		1603	0
		1604.75	0
		1606.5	0
		1608.25	0
		1610	0
		1611.75	0
		1613.5	0
		1615.25	0
		1617	0
		1618.75	0
		1620.5	0
		1622.25	0
		1624	0
		1625.75	0
		1627.5	0
		1629.25	0
		1631	0
		1632.75	0
		1634.5	0
		1636.25	0
		1638	0
		1639.75	0
		1641.5	0
		1643.25	0
		1645	0
		1646.75	0
		1648.5	0
		1650.25	0
		1652	0
		1653.75	0
		1655.5	0
		1657.25	0
		1659	0
		1660.75	0
		1662.5	0
		1664.25	0
		1666	0
		1667.75	0
		1669.5	0
		1671.25	0
		1673	2.03293e-08
		1674.75	4.73401e-08
		1676.5	1.06149e-07
		1678.25	2.29182e-07
		1680	4.7646e-07
		1681.75	9.5379e-07
		1683.5	1.83848e-06
		1685.25	3.41228e-06
		1687	6.09831e-06
		1688.75	1.04943e-05
		1690.5	1.73892e-05
		1692.25	2.77451e-05
		1694	4.26257e-05
		1695.75	6.30574e-05
		1697.5	8.98217e-05
		1699.25	0.000123199
		1701	0.000162709
		1702.75	0.000206917
		1704.5	0.000253373
		1706.25	0.000298748
		1708	0.00033918
		1709.75	0.000370796
		1711.5	0.000390318
		1713.25	0.000395625
		1715	0.000386125
		1716.75	0.00036287
		1718.5	0.000328364
		1720.25	0.000286114
		1722	0.000240051
		1723.75	0.000193931
		1725.5	0.000150859
		1727.25	0.000112999
		1729	8.15001e-05
		1730.75	5.66007e-05
		1732.5	3.78499e-05
		1734.25	2.43837e-05
		1736	1.51308e-05
		1737.75	9.05413e-06
		1739.5	5.2392e-06
		1741.25	2.95579e-06
		1743	1.66463e-06
		1744.75	9.95126e-07
		1746.5	7.10914e-07
		1748.25	6.74604e-07
		1750	8.18071e-07
		1751.75	1.12049e-06
		1753.5	1.59382e-06
		1755.25	2.26772e-06
		1757	3.21492e-06
		1758.75	4.49615e-06
		1760.5	6.20296e-06
		1762.25	8.44201e-06
		1764	1.1347e-05
		1765.75	1.50345e-05
		1767.5	1.96537e-05
		1769.25	2.53497e-05
		1771	3.22622e-05
		1772.75	4.05176e-05
		1774.5	5.02182e-05
		1776.25	6.14417e-05
		1778	7.42319e-05
		1779.75	8.85537e-05
		1781.5	0.000104355
		1783.25	0.000121549
		1785	0.000140051
		1786.75	0.000159763
		1788.5	0.000180697
		1790.25	0.000203013
		1792	0.000227117
		1793.75	0.000253775
		1795.5	0.000284175
		1797.25	0.000320019
		1799	0.000363476
		1800.75	0.000417041
		1802.5	0.000483246
		1804.25	0.000564147
		1806	0.000660819
		1807.75	0.000772729
		1809.5	0.000897319
		1811.25	0.00102982
		1813	0.00116358
		1814.75	0.00129086
		1816.5	0.00140383
		1818.25	0.001496
		1820	0.00156325
		1821.75	0.0016047
		1823.5	0.00162276
		1825.25	0.00162286
		1827	0.00161244
		1828.75	0.00159998
		1830.5	0.00159381
		1832.25	0.00160128
		1834	0.00162817
		1835.75	0.00167822
		1837.5	0.00175289
		1839.25	0.00185114
		1841	0.00196934
		1842.75	0.0021013
		1844.5	0.00223871
		1846.25	0.00237197
		1848	0.00249157
		1849.75	0.00258964
		1851.5	0.00266148
		1853.25	0.00270652
		1855	0.00272845
		1856.75	0.00273441
		1858.5	0.0027333
		1860.25	0.00273395
		1862	0.00274315
		1863.75	0.00276462
		1865.5	0.00279859
		1867.25	0.00284222
		1869	0.00289043
		1870.75	0.00293685
		1872.5	0.00297466
		1874.25	0.00299716
		1876	0.00299813
		1877.75	0.00297221
		1879.5	0.0029152
		1881.25	0.0028246
		1883	0.00270006
		1884.75	0.00254366
		1886.5	0.00236008
		1888.25	0.00215622
		1890	0.00194059
		1891.75	0.00172236
		1893.5	0.00151035
		1895.25	0.00131208
		1897	0.00113302
		1898.75	0.000976391
		1900.5	0.000843162
		1902.25	0.00073246
		1904	0.000642124
		1905.75	0.000569313
		1907.5	0.000511061
		1909.25	0.000464679
		1911	0.000427929
		1912.75	0.000399168
		1914.5	0.000377278
		1916.25	0.000361578
		1918	0.000351644
		1919.75	0.000347242
		1921.5	0.000348148
		1923.25	0.000354067
		1925	0.000364575
		1926.75	0.00037907
		1928.5	0.000396837
		1930.25	0.000417047
		1932	0.000438868
		1933.75	0.0004616
		1935.5	0.000484736
		1937.25	0.000508058
		1939	0.000531622
		1940.75	0.000555669
		1942.5	0.000580434
		1944.25	0.000605897
		1946	0.000631521
		1947.75	0.000656064
		1949.5	0.000677527
		1951.25	0.000693328
		1953	0.000700659
		1954.75	0.000696901
		1956.5	0.000680258
		1958.25	0.000650128
		1960	0.000607335
		1961.75	0.000554074
		1963.5	0.000493592
		1965.25	0.00042969
		1967	0.000366157
		1968.75	0.000306273
		1970.5	0.000252472
		1972.25	0.000206199
		1974	0.000167967
		1975.75	0.000137546
		1977.5	0.00011422
		1979.25	9.70382e-05
		1981	8.50547e-05
		1982.75	7.74116e-05
		1984.5	7.34486e-05
		1986.25	7.2698e-05
		1988	7.48542e-05
		1989.75	7.97221e-05
		1991.5	8.71597e-05
		1993.25	9.7025e-05
		1995	0.000109123
		1996.75	0.00012321
		1998.5	0.000138911
		2000.25	0.000155756
		2002	0.000173192
		2003.75	0.000190566
		2005.5	0.000207177
		2007.25	0.000222312
		2009	0.000235278
		2010.75	0.000245455
		2012.5	0.000252334
		2014.25	0.000255552
		2016	0.00025492
		2017.75	0.000250433
		2019.5	0.000242272
		2021.25	0.000230787
		2023	0.000216467
		2024.75	0.000199908
		2026.5	0.000181768
		2028.25	0.000162721
		2030	0.000143418
		2031.75	0.000124449
		2033.5	0.000106317
		2035.25	8.94213e-05
		2037	7.40454e-05
		2038.75	6.03636e-05
		2040.5	4.84474e-05
		2042.25	3.82723e-05
		2044	2.97733e-05
		2045.75	2.28025e-05
		2047.5	1.7193e-05
		2049.25	1.27625e-05
		2051	9.32684e-06
		2052.75	6.71038e-06
		2054.5	4.75306e-06
		2056.25	3.31447e-06
		2058	2.27546e-06
		2059.75	1.53794e-06
		2061.5	1.02334e-06
		2063.25	6.70376e-07
		2065	4.32345e-07
		2066.75	2.74508e-07
		2068.5	1.71591e-07
		2070.25	1.05596e-07
		2072	6.3976e-08
		2073.75	3.81592e-08
		2075.5	2.24076e-08
		2077.25	1.29541e-08
		2079	0
		2080.75	0
		2082.5	0
		2084.25	0
		2086	0
		2087.75	0
		2089.5	0
		2091.25	0
		2093	0
		2094.75	0
		2096.5	0
		2098.25	0
		2100	0
		2101.75	0
		2103.5	0
		2105.25	0
		2107	0
		2108.75	0
		2110.5	0
		2112.25	0
		2114	0
		2115.75	0
		2117.5	0
		2119.25	0
		2121	0
		2122.75	0
		2124.5	0
		2126.25	0
		2128	0
		2129.75	0
		2131.5	0
		2133.25	0
		2135	0
		2136.75	0
		2138.5	0
		2140.25	0
		2142	0
		2143.75	0
		2145.5	0
		2147.25	0
		2149	0
		2150.75	0
		2152.5	0
		2154.25	0
		2156	0
		2157.75	0
		2159.5	0
		2161.25	0
		2163	0
		2164.75	0
		2166.5	0
		2168.25	0
		2170	0
		2171.75	0
		2173.5	0
		2175.25	0
		2177	0
		2178.75	0
		2180.5	0
		2182.25	0
		2184	0
		2185.75	0
		2187.5	0
		2189.25	0
		2191	0
		2192.75	0
		2194.5	0
		2196.25	0
		2198	0
		2199.75	0
		2201.5	0
		2203.25	0
		2205	0
		2206.75	0
		2208.5	0
		2210.25	0
		2212	0
		2213.75	0
		2215.5	0
		2217.25	0
		2219	0
		2220.75	0
		2222.5	0
		2224.25	0
		2226	0
		2227.75	0
		2229.5	0
		2231.25	0
		2233	0
		2234.75	0
		2236.5	9.25044e-09
		2238.25	1.40418e-08
		2240	2.1125e-08
		2241.75	3.14981e-08
		2243.5	4.65464e-08
		2245.25	6.81713e-08
		2247	9.89534e-08
		2248.75	1.42355e-07
		2250.5	2.0297e-07
		2252.25	2.86815e-07
		2254	4.01687e-07
		2255.75	5.57553e-07
		2257.5	7.67006e-07
		2259.25	1.04574e-06
		2261	1.41308e-06
		2262.75	1.89243e-06
		2264.5	2.51182e-06
		2266.25	3.30423e-06
		2268	4.3079e-06
		2269.75	5.56642e-06
		2271.5	7.12852e-06
		2273.25	9.05688e-06
		2275	1.13949e-05
		2276.75	1.42092e-05
		2278.5	1.75615e-05
		2280.25	2.15123e-05
		2282	2.61188e-05
		2283.75	3.14313e-05
		2285.5	3.74906e-05
		2287.25	4.43241e-05
		2289	5.19425e-05
		2290.75	6.0346e-05
		2292.5	6.94884e-05
		2294.25	7.93201e-05
		2296	8.97595e-05
		2297.75	0.000100711
		2299.5	0.00011203
		2301.25	0.000123573
		2303	0.000135174
		2304.75	0.000146661
		2306.5	0.000157861
		2308.25	0.000168607
		2310	0.000178759
		2311.75	0.000188204
		2313.5	0.000196876
		2315.25	0.000204766
		2317	0.000211932
		2318.75	0.000218506
		2320.5	0.000224704
		2322.25	0.000230818
		2324	0.000237216
		2325.75	0.000244326
		2327.5	0.000252611
		2329.25	0.000262538
		2331	0.000274539
		2332.75	0.000288967
		2334.5	0.000306056
		2336.25	0.000325837
		2338	0.000348158
		2339.75	0.000372625
		2341.5	0.000398609
		2343.25	0.000425267
		2345	0.000451585
		2346.75	0.000476446
		2348.5	0.000498713
		2350.25	0.000517324
		2352	0.000531379
		2353.75	0.00054022
		2355.5	0.000543488
		2357.25	0.000541149
		2359	0.000533495
		2360.75	0.000521102
		2362.5	0.000504779
		2364.25	0.000485483
		2366	0.000464239
		2367.75	0.000442057
		2369.5	0.000419865
		2371.25	0.000398447
		2373	0.000378423
		2374.75	0.000360227
		2376.5	0.00034412
		2378.25	0.000330208
		2380	0.000318472
		2381.75	0.000308799
		2383.5	0.000301016
		2385.25	0.000294915
		2387	0.000290276
		2388.75	0.000286879
		2390.5	0.000284516
		2392.25	0.000282993
		2394	0.000282126
		2395.75	0.000281745
		2397.5	0.000281685
		2399.25	0.000281786
		2401	0.000281888
		2402.75	0.000281827
		2404.5	0.000281462
		2406.25	0.000280631
		2408	0.000279185
		2409.75	0.000276991
		2411.5	0.00027392
		2413.25	0.000269891
		2415	0.000264816
		2416.75	0.000258656
		2418.5	0.000251384
		2420.25	0.000243019
		2422	0.000233613
		2423.75	0.000223245
		2425.5	0.000212024
		2427.25	0.000200086
		2429	0.000187587
		2430.75	0.000174696
		2432.5	0.000161598
		2434.25	0.000148489
		2436	0.00013554
		2437.75	0.000122941
		2439.5	0.000110866
		2441.25	9.94792e-05
		2443	8.89335e-05
		2444.75	7.9369e-05
		2446.5	7.0915e-05
		2448.25	6.36854e-05
		2450	5.7809e-05
		2451.75	5.33864e-05
		2453.5	5.05272e-05
		2455.25	4.93428e-05
		2457	4.99479e-05
		2458.75	5.24615e-05
		2460.5	5.70051e-05
		2462.25	6.36998e-05
		2464	7.26607e-05
		2465.75	8.39884e-05
		2467.5	9.77682e-05
		2469.25	0.000114026
		2471	0.000132783
		2472.75	0.000153931
		2474.5	0.000177335
		2476.25	0.00020276
		2478	0.000229882
		2479.75	0.000258286
		2481.5	0.000287483
		2483.25	0.000316932
		2485	0.000346071
		2486.75	0.000374354
		2488.5	0.000401341
		2490.25	0.000426698
		2492	0.000450293
		2493.75	0.000472227
		2495.5	0.00049286
		2497.25	0.000512807
		2499	0.000532896
		2500.75	0.000554087
		2502.5	0.000577358
		2504.25	0.000603545
		2506	0.000633217
		2507.75	0.000666477
		2509.5	0.00070288
		2511.25	0.000741366
		2513	0.000780275
		2514.75	0.000817458
		2516.5	0.000850449
		2518.25	0.000876716
		2520	0.000893928
		2521.75	0.00090022
		2523.5	0.000894402
		2525.25	0.000876097
		2527	0.000845775
		2528.75	0.000804689
		2530.5	0.000754715
		2532.25	0.000698146
		2534	0.000637444
		2535.75	0.000575016
		2537.5	0.000513013
		2539.25	0.000453206
		2541	0.000396909
		2542.75	0.000344981
		2544.5	0.000297866
		2546.25	0.00025567
		2548	0.000218254
		2549.75	0.00018532
		2551.5	0.000156489
		2553.25	0.000131357
		2555	0.000109535
		2556.75	9.06666e-05
		2558.5	7.44344e-05
		2560.25	6.05577e-05
		2562	4.87856e-05
		2563.75	3.88892e-05
		2565.5	3.0649e-05
		2567.25	2.38802e-05
		2569	1.83814e-05
		2570.75	1.39669e-05
		2572.5	1.0483e-05
		2574.25	7.76645e-06
		2576	5.66593e-06
		2577.75	4.09094e-06
		2579.5	2.91384e-06
		2581.25	2.04737e-06
		2583	1.4191e-06
		2584.75	9.70336e-07
		2586.5	6.54514e-07
		2588.25	4.35516e-07
		2590	2.85876e-07
		2591.75	1.85115e-07
		2593.5	1.18248e-07
		2595.25	7.45132e-08
		2597	4.63193e-08
		2598.75	2.8404e-08
		2600.5	1.71825e-08
		2602.25	1.02537e-08
		2604	0
		2605.75	0
		2607.5	0
		2609.25	0
		2611	0
		2612.75	0
		2614.5	0
		2616.25	0
		2618	0
		2619.75	0
		2621.5	0
		2623.25	0
		2625	0
		2626.75	1.57245e-08
		2628.5	2.97171e-08
		2630.25	5.49794e-08
		2632	9.95764e-08
		2633.75	1.76554e-07
		2635.5	3.06451e-07
		2637.25	5.20725e-07
		2639	8.66203e-07
		2640.75	1.41057e-06
		2642.5	2.24871e-06
		2644.25	3.50943e-06
		2646	5.3617e-06
		2647.75	8.01922e-06
		2649.5	1.17416e-05
		2651.25	1.683e-05
		2653	2.36159e-05
		2654.75	3.24406e-05
		2656.5	4.36252e-05
		2658.25	5.74314e-05
		2660	7.4016e-05
		2661.75	9.33824e-05
		2663.5	0.000115337
		2665.25	0.000139455
		2667	0.000165069
		2668.75	0.000191276
		2670.5	0.000216979
		2672.25	0.000240957
		2674	0.000261954
		2675.75	0.000278788
		2677.5	0.000290461
		2679.25	0.000296254
		2681	0.000295804
		2682.75	0.00028914
		2684.5	0.000276679
		2686.25	0.000259183
		2688	0.000237685
		2689.75	0.000213384
		2691.5	0.000187535
		2693.25	0.00016135
		2695	0.0001359
		2696.75	0.000112055
		2698.5	9.04504e-05
		2700.25	7.14745e-05
		2702	5.52912e-05
		2703.75	4.18721e-05
		2705.5	3.10425e-05
		2707.25	2.25295e-05
		2709	1.60071e-05
		2710.75	1.11336e-05
		2712.5	7.58092e-06
		2714.25	5.05327e-06
		2716	3.29752e-06
		2717.75	2.10652e-06
		2719.5	1.31737e-06
		2721.25	8.06514e-07
		2723	4.83372e-07
		2724.75	2.83605e-07
		2726.5	1.62896e-07
		2728.25	9.15948e-08
		2730	5.04191e-08
		2731.75	2.71695e-08
		2733.5	1.43329e-08
		2735.25	0
		2737	0
		2738.75	0
		2740.5	0
		2742.25	0
		2744	0
		2745.75	0
		2747.5	0
		2749.25	0
		2751	0
		2752.75	0
		2754.5	0
		2756.25	0
		2758	0
		2759.75	0
		2761.5	0
		2763.25	0
		2765	0
		2766.75	0
		2768.5	0
		2770.25	0
		2772	0
		2773.75	0
		2775.5	0
		2777.25	0
		2779	0
		2780.75	0
		2782.5	0
		2784.25	0
		2786	0
		2787.75	0
		2789.5	0
		2791.25	0
		2793	0
		2794.75	0
		2796.5	0
		2798.25	0
		2800	0
		2801.75	0
		2803.5	0
		2805.25	0
		2807	0
		2808.75	0
		2810.5	0
		2812.25	0
		2814	0
		2815.75	0
		2817.5	0
		2819.25	0
		2821	0
		2822.75	0
		2824.5	0
		2826.25	0
		2828	0
		2829.75	0
		2831.5	0
		2833.25	0
		2835	0
		2836.75	0
		2838.5	0
		2840.25	0
		2842	0
		2843.75	0
		2845.5	0
		2847.25	0
		2849	0
		2850.75	0
		2852.5	0
		2854.25	0
		2856	0
		2857.75	0
		2859.5	0
		2861.25	0
		2863	0
		2864.75	0
		2866.5	0
		2868.25	0
		2870	0
		2871.75	0
		2873.5	0
		2875.25	0
		2877	0
		2878.75	0
		2880.5	0
		2882.25	0
		2884	0
		2885.75	0
		2887.5	0
		2889.25	0
		2891	0
		2892.75	0
		2894.5	0
		2896.25	0
		2898	0
		2899.75	0
		2901.5	0
		2903.25	0
		2905	0
		2906.75	0
		2908.5	0
		2910.25	0
		2912	0
		2913.75	0
		2915.5	0
		2917.25	0
		2919	0
		2920.75	0
		2922.5	0
		2924.25	0
		2926	0
		2927.75	0
		2929.5	0
		2931.25	0
		2933	0
		2934.75	0
		2936.5	0
		2938.25	0
		2940	0
		2941.75	0
		2943.5	0
		2945.25	0
		2947	0
		2948.75	0
		2950.5	0
		2952.25	0
		2954	0
		2955.75	0
		2957.5	0
		2959.25	0
		2961	0
		2962.75	0
		2964.5	0
		2966.25	0
		2968	0
		2969.75	0
		2971.5	0
		2973.25	0
		2975	0
		2976.75	0
		2978.5	0
		2980.25	0
		2982	0
		2983.75	0
		2985.5	0
		2987.25	0
		2989	0
		2990.75	0
		2992.5	0
		2994.25	0
		2996	0
		2997.75	0
		2999.5	0
		3001.25	0
		3003	0
		3004.75	0
		3006.5	0
		3008.25	0
		3010	0
		3011.75	0
		3013.5	0
		3015.25	0
		3017	0
		3018.75	0
		3020.5	0
		3022.25	0
		3024	0
		3025.75	0
		3027.5	0
		3029.25	0
		3031	0
		3032.75	0
		3034.5	0
		3036.25	0
		3038	0
		3039.75	0
		3041.5	0
		3043.25	0
		3045	0
		3046.75	0
		3048.5	0
		3050.25	0
		3052	0
		3053.75	0
		3055.5	0
		3057.25	0
		3059	0
		3060.75	0
		3062.5	0
		3064.25	0
		3066	0
		3067.75	1.31234e-08
		3069.5	1.91497e-08
		3071.25	2.77302e-08
		3073	3.98491e-08
		3074.75	5.68275e-08
		3076.5	8.04219e-08
		3078.25	1.12944e-07
		3080	1.57409e-07
		3081.75	2.17706e-07
		3083.5	2.98804e-07
		3085.25	4.06983e-07
		3087	5.50099e-07
		3088.75	7.37872e-07
		3090.5	9.82192e-07
		3092.25	1.29744e-06
		3094	1.70079e-06
		3095.75	2.21254e-06
		3097.5	2.85631e-06
		3099.25	3.65928e-06
		3101	4.65222e-06
		3102.75	5.86948e-06
		3104.5	7.34876e-06
		3106.25	9.13069e-06
		3108	1.12582e-05
		3109.75	1.37755e-05
		3111.5	1.67271e-05
		3113.25	2.01563e-05
		3115	2.41032e-05
		3116.75	2.86031e-05
		3118.5	3.36843e-05
		3120.25	3.93655e-05
		3122	4.56541e-05
		3123.75	5.25435e-05
		3125.5	6.00112e-05
		3127.25	6.80175e-05
		3129	7.65041e-05
		3130.75	8.53931e-05
		3132.5	9.45881e-05
		3134.25	0.000103974
		3136	0.00011342
		3137.75	0.00012278
		3139.5	0.000131898
		3141.25	0.000140614
		3143	0.000148761
		3144.75	0.000156181
		3146.5	0.00016272
		3148.25	0.00016824
		3150	0.00017262
		3151.75	0.000175764
		3153.5	0.0001776
		3155.25	0.000178086
		3157	0.000177211
		3158.75	0.000174996
		3160.5	0.000171491
		3162.25	0.000166774
		3164	0.00016095
		3165.75	0.000154145
		3167.5	0.000146501
		3169.25	0.000138174
		3171	0.000129327
		3172.75	0.000120123
		3174.5	0.000110723
		3176.25	0.00010128
		3178	9.19361e-05
		3179.75	8.28176e-05
		3181.5	7.40345e-05
		3183.25	6.56781e-05
		3185	5.78205e-05
		3186.75	5.05148e-05
		3188.5	4.37955e-05
		3190.25	3.76804e-05
		3192	3.21719e-05
		3193.75	2.72592e-05
		3195.5	2.29205e-05
		3197.25	1.91254e-05
		3199	1.58369e-05
		3200.75	1.30139e-05
		3202.5	1.06125e-05
		3204.25	8.58821e-06
		3206	6.89705e-06
		3207.75	5.49666e-06
		3209.5	4.3472e-06
		3211.25	3.41189e-06
		3213	2.65739e-06
		3214.75	2.05395e-06
		3216.5	1.57543e-06
		3218.25	1.19918e-06
		3220	9.05828e-07
		3221.75	6.79017e-07
		3223.5	5.05115e-07
		3225.25	3.72885e-07
		3227	2.73171e-07
		3228.75	1.98596e-07
		3230.5	1.43278e-07
		3232.25	1.0258e-07
		3234	7.28825e-08
		3235.75	5.13876e-08
		3237.5	3.59557e-08
		3239.25	2.49662e-08
		3241	1.72033e-08
		3242.75	1.17637e-08
		3244.5	0
		3246.25	0
		3248	0
		3249.75	0
		3251.5	0
		3253.25	0
		3255	0
		3256.75	0
		3258.5	0
		3260.25	0
		3262	0
		3263.75	0
		3265.5	0
		3267.25	0
		3269	0
		3270.75	0
		3272.5	0
		3274.25	0
		3276	0
		3277.75	0
		3279.5	0
		3281.25	0
		3283	0
		3284.75	0
		3286.5	0
		3288.25	0
		3290	0
		3291.75	0
		3293.5	0
		3295.25	0
		3297	0
		3298.75	0
		3300.5	0
		3302.25	0
		3304	0
		3305.75	0
		3307.5	0
		3309.25	0
		3311	0
		3312.75	0
		3314.5	0
		3316.25	0
		3318	0
		3319.75	0
		3321.5	0
		3323.25	0
		3325	0
		3326.75	0
		3328.5	0
		3330.25	0
		3332	0
		3333.75	0
		3335.5	0
		3337.25	0
		3339	0
		3340.75	0
		3342.5	0
		3344.25	0
		3346	0
		3347.75	0
		3349.5	0
		3351.25	0
		3353	0
		3354.75	0
		3356.5	0
		3358.25	0
		3360	0
		3361.75	0
		3363.5	0
		3365.25	0
		3367	0
		3368.75	0
		3370.5	0
		3372.25	0
		3374	0
		3375.75	0
		3377.5	0
		3379.25	0
		3381	0
		3382.75	0
		3384.5	0
		3386.25	0
		3388	0
		3389.75	0
		3391.5	0
		3393.25	0
		3395	0
		3396.75	0
		3398.5	0
		3400.25	0
		3402	0
		3403.75	0
		3405.5	0
		3407.25	0
		3409	0
		3410.75	0
		3412.5	0
		3414.25	0
		3416	0
		3417.75	0
		3419.5	0
		3421.25	0
		3423	0
		3424.75	0
		3426.5	0
		3428.25	0
		3430	0
		3431.75	0
		3433.5	0
		3435.25	0
		3437	0
		3438.75	0
		3440.5	0
		3442.25	0
		3444	0
		3445.75	0
		3447.5	0
		3449.25	0
		3451	0
		3452.75	0
		3454.5	0
		3456.25	0
		3458	0
		3459.75	0
		3461.5	0
		3463.25	0
		3465	0
		3466.75	0
		3468.5	0
		3470.25	0
		3472	0
		3473.75	0
		3475.5	0
		3477.25	0
		3479	0
		3480.75	0
		3482.5	0
		3484.25	0
		3486	0
		3487.75	0
		3489.5	0
		3491.25	0
		3493	0
		3494.75	0
		3496.5	0
		3498.25	0
[truncated: 1 more rows]

## Sheet: PlotDat8
Source sheet	Sheet3	0	0	140	0	0	0
Plot name	ProbDens5	1.4	0	210	0	2798.6	0
Plot Type	16	2.8	0	210	1
1st free col	9	4.2	0	140	1
Sigma Level	2	5.6	0	140	0
Absolute Errs	TRUE	7	0	ErrBox	ErrBox
Symbol Type	1	8.4	0	210	0
Inverse Plot	FALSE	9.8	0	280	0
Color Plot	TRUE	11.2	0	280	27
3D plot	FALSE	12.6	0	210	27
Linear	FALSE	14	0	210	0
Data Range	J1:K183	15.4	0	ErrBox	ErrBox
Filled Symbols	FALSE	16.8	0	280	0
ConcAge	FALSE	18.2	0	350	0
ConcSwap	FALSE	19.6	0	350	22
1st Symbol-row	1	21	0	280	22
		22.4	0	280	0
		23.8	0	ErrBox	ErrBox
		25.2	0	350	0
		26.6	0	420	0
		28	0	420	9
		29.4	0	350	9
		30.8	0	350	0
		32.2	0	ErrBox	ErrBox
		33.6	0	420	0
		35	0	490	0
		36.4	0	490	24
		37.8	0	420	24
		39.2	0	420	0
		40.6	0	ErrBox	ErrBox
		42	0	490	0
		43.4	0	560	0
		44.8	0	560	1
		46.2	0	490	1
		47.6	0	490	0
		49	0	ErrBox	ErrBox
		50.4	0	700	0
		51.8	0	770	0
		53.2	0	770	3
		54.6	0	700	3
		56	0	700	0
		57.4	0	ErrBox	ErrBox
		58.8	0	770	0
		60.2	0	840	0
		61.6	0	840	9
		63	0	770	9
		64.4	0	770	0
		65.8	0	ErrBox	ErrBox
		67.2	0	840	0
		68.6	0	910	0
		70	0	910	7
		71.4	0	840	7
		72.8	0	840	0
		74.2	0	ErrBox	ErrBox
		75.6	0	910	0
		77	0	980	0
		78.4	0	980	5
		79.8	0	910	5
		81.2	0	910	0
		82.6	0	ErrBox	ErrBox
		84	0	980	0
		85.4	0	1050	0
		86.8	0	1050	1
		88.2	0	980	1
		89.6	0	980	0
		91	0	ErrBox	ErrBox
		92.4	0	1050	0
		93.8	0	1120	0
		95.2	0	1120	1
		96.6	0	1050	1
		98	0	1050	0
		99.4	0	ErrBox	ErrBox
		100.8	0	1260	0
		102.2	0	1330	0
		103.6	0	1330	1
		105	0	1260	1
		106.4	0	1260	0
		107.8	0	ErrBox	ErrBox
		109.2	0	1330	0
		110.6	0	1400	0
		112	0	1400	1
		113.4	0	1330	1
		114.8	0	1330	0
		116.2	0	ErrBox	ErrBox
		117.6	0	1400	0
		119	0	1470	0
		120.4	0	1470	1
		121.8	0	1400	1
		123.2	0	1400	0
		124.6	0	ErrBox	ErrBox
		126	0	1470	0
		127.4	0	1540	0
		128.8	0	1540	1
		130.2	0	1470	1
		131.6	0	1470	0
		133	0	ErrBox	ErrBox
		134.4	0	1610	0
		135.8	0	1680	0
		137.2	0	1680	1
		138.6	0	1610	1
		140	0	1610	0
		141.4	0	ErrBox	ErrBox
		142.8	0	1680	0
		144.2	0	1750	0
		145.6	0	1750	2
		147	0	1680	2
		148.4	0	1680	0
		149.8	0	ErrBox	ErrBox
		151.2	0	1750	0
		152.6	0	1820	0
		154	0	1820	8
		155.4	0	1750	8
		156.8	0	1750	0
		158.2	0	ErrBox	ErrBox
		159.6	0	1820	0
		161	0	1890	0
		162.4	0	1890	26
		163.8	0	1820	26
		165.2	0	1820	0
		166.6	0	ErrBox	ErrBox
		168	0	1890	0
		169.4	0	1960	0
		170.8	0	1960	8
		172.2	0	1890	8
		173.6	0	1890	0
		175	0	ErrBox	ErrBox
		176.4	0	1960	0
		177.8	0	2030	0
		179.2	0	2030	1
		180.6	0	1960	1
		182	1.59924e-07	1960	0
		183.4	7.04739e-06	ErrBox	ErrBox
		184.8	0.000114248	2030	0
		186.2	0.000681356	2100	0
		187.6	0.00149488	2100	1
		189	0.00120654	2030	1
		190.4	0.000358249	2030	0
		191.8	3.91321e-05	ErrBox	ErrBox
		193.2	1.57248e-06	2100	0
		194.6	2.32458e-08	2170	0
		196	0	2170	1
		197.4	0	2100	1
		198.8	0	2100	0
		200.2	0	ErrBox	ErrBox
		201.6	0	2240	0
		203	0	2310	0
		204.4	0	2310	1
		205.8	0	2240	1
		207.2	0	2240	0
		208.6	0	ErrBox	ErrBox
		210	0	2310	0
		211.4	0	2380	0
		212.8	0	2380	2
		214.2	0	2310	2
		215.6	0	2310	0
		217	0	ErrBox	ErrBox
		218.4	0	2380	0
		219.8	0	2450	0
		221.2	0	2450	3
		222.6	0	2380	3
		224	0	2380	0
		225.4	0	ErrBox	ErrBox
		226.8	0	2450	0
		228.2	1.4113e-07	2520	0
		229.6	1.99992e-05	2520	13
		231	0.000478208	2450	13
		232.4	0.0019374	2450	0
		233.8	0.00136719	ErrBox	ErrBox
		235.2	0.000382915	2520	0
		236.6	0.00100208	2590	0
		238	0.00285992	2590	1
		239.4	0.0024813	2520	1
		240.8	0.000869905	2520	0
		242.2	0.000424417	ErrBox	ErrBox
		243.6	0.000861546	2590	0
		245	0.00255536	2660	0
		246.4	0.00446922	2660	1
		247.8	0.00453228	2590	1
		249.2	0.00411133	2590	0
		250.6	0.00348816	ErrBox	ErrBox
		252	0.00295432
		253.4	0.00323234
		254.8	0.00102161
		256.2	0.00203166
		257.6	0.00580091
		259	0.00699085
		260.4	0.00482947
		261.8	0.00361029
		263.2	0.0036161
		264.6	0.00330268
		266	0.0055397
		267.4	0.00639162
		268.8	0.00342651
		270.2	0.00210151
		271.6	0.00261157
		273	0.00294277
		274.4	0.00124826
		275.8	0.00111762
		277.2	0.00364943
		278.6	0.00543114
		280	0.00491873
		281.4	0.00407777
		282.8	0.00484745
		284.2	0.00455963
		285.6	0.00310428
		287	0.00358101
		288.4	0.00259828
		289.8	0.000886152
		291.2	0.000248377
		292.6	0.000108537
		294	5.21763e-05
		295.4	2.59386e-05
		296.8	5.74771e-05
		298.2	0.000441218
		299.6	0.00223072
		301	0.00467514
		302.4	0.00329602
		303.8	0.000866129
		305.2	0.000135449
		306.6	1.83982e-05
		308	2.43018e-05
		309.4	0.000162947
		310.8	0.000892094
		312.2	0.00292539
		313.6	0.00463245
		315	0.00350706
		316.4	0.00199699
		317.8	0.00177642
		319.2	0.00210148
		320.6	0.00257317
		322	0.00378977
		323.4	0.00388078
		324.8	0.00225871
		326.2	0.000723044
		327.6	0.000532605
		329	0.00119589
		330.4	0.00136584
		331.8	0.000800446
		333.2	0.000633884
		334.6	0.00128018
		336	0.00209594
		337.4	0.00208493
		338.8	0.00134898
		340.2	0.00080971
		341.6	0.000713036
		343	0.000772234
		344.4	0.00074751
		345.8	0.000583827
		347.2	0.000362125
		348.6	0.000206524
		350	0.000292651
		351.4	0.000797669
		352.8	0.00136355
		354.2	0.00191243
		355.6	0.00249935
		357	0.00101584
		358.4	0.000666696
		359.8	0.00150883
		361.2	0.00129306
		362.6	0.000378319
		364	3.94523e-05
		365.4	4.74139e-05
		366.8	0.000428021
		368.2	0.00135479
		369.6	0.00146306
		371	0.000541341
		372.4	0.000113446
		373.8	0.000399882
		375.2	0.00140113
		376.6	0.00228925
		378	0.00261321
		379.4	0.00244525
		380.8	0.00149158
		382.2	0.000663664
		383.6	0.000258824
		385	8.04144e-05
		386.4	1.79719e-05
		387.8	2.82412e-06
		389.2	3.11198e-07
		390.6	2.40466e-08
		392	0
		393.4	0
		394.8	0
		396.2	0
		397.6	0
		399	0
		400.4	1.59197e-07
		401.8	6.57429e-06
		403.2	0.00011761
		404.6	0.000740039
		406	0.00160992
		407.4	0.0012604
		408.8	0.000528489
		410.2	0.000465113
		411.6	0.000646325
		413	0.000749952
		414.4	0.000690051
		415.8	0.000503087
		417.2	0.000293733
		418.6	0.000174649
		420	0.000328424
		421.4	0.00103555
		422.8	0.00205488
		424.2	0.00230144
		425.6	0.00146354
		427	0.000587927
		428.4	0.000470475
		429.8	0.00112728
		431.2	0.00213883
		432.6	0.00350443
		434	0.00523124
		435.4	0.00654943
		436.8	0.00786851
		438.2	0.00808097
		439.6	0.00576436
		441	0.00323082
		442.4	0.00209502
		443.8	0.00204174
		445.2	0.00230148
		446.6	0.0021958
		448	0.00202094
		449.4	0.00225602
		450.8	0.00304664
		452.2	0.00384441
		453.6	0.00343618
		455	0.00204272
		456.4	0.000817922
		457.8	0.000211311
		459.2	3.34815e-05
		460.6	9.63045e-06
		462	5.39787e-05
		463.4	0.000253918
		464.8	0.000696081
		466.2	0.00110928
		467.6	0.00103016
		469	0.00056907
		470.4	0.000227589
		471.8	0.00017193
		473.2	0.000293751
		474.6	0.00049412
		476	0.000731257
		477.4	0.00104425
		478.8	0.00143833
		480.2	0.00159744
		481.6	0.00121709
		483	0.000641998
		484.4	0.000413587
		485.8	0.000608647
		487.2	0.000916956
		488.6	0.000966504
		490	0.000682578
		491.4	0.00032172
		492.8	0.00010115
		494.2	2.12132e-05
		495.6	2.96738e-06
		497	2.76866e-07
		498.4	1.72304e-08
		499.8	0
		501.2	0
		502.6	0
		504	0
		505.4	0
		506.8	0
		508.2	0
		509.6	0
		511	0
		512.4	0
		513.8	0
		515.2	0
		516.6	0
		518	0
		519.4	9.38713e-09
		520.8	1.29585e-07
		522.2	1.27291e-06
		523.6	8.89733e-06
		525	4.42528e-05
		526.4	0.000156618
		527.8	0.000394421
		529.2	0.000706803
		530.6	0.000901272
		532	0.000817773
		533.4	0.000527994
		534.8	0.000242574
		536.2	7.9301e-05
		537.6	1.84473e-05
		539	3.05356e-06
		540.4	3.59665e-07
		541.8	3.01446e-08
		543.2	0
		544.6	0
		546	0
		547.4	0
		548.8	0
		550.2	0
		551.6	0
		553	0
		554.4	0
		555.8	0
		557.2	0
		558.6	0
		560	0
		561.4	0
		562.8	0
		564.2	0
		565.6	0
		567	0
		568.4	0
		569.8	0
		571.2	0
		572.6	0
		574	0
		575.4	0
		576.8	0
		578.2	0
		579.6	0
		581	0
		582.4	0
		583.8	0
		585.2	0
		586.6	0
		588	0
		589.4	0
		590.8	0
		592.2	0
		593.6	0
		595	0
		596.4	0
		597.8	0
		599.2	0
		600.6	0
		602	0
		603.4	0
		604.8	0
		606.2	0
		607.6	0
		609	0
		610.4	0
		611.8	0
		613.2	0
		614.6	0
		616	0
		617.4	0
		618.8	0
		620.2	0
		621.6	0
		623	0
		624.4	0
		625.8	0
		627.2	0
		628.6	0
		630	0
		631.4	0
		632.8	0
		634.2	0
		635.6	0
		637	0
		638.4	0
		639.8	0
		641.2	0
		642.6	0
		644	0
		645.4	0
		646.8	0
		648.2	0
		649.6	0
		651	0
		652.4	0
		653.8	0
		655.2	0
		656.6	0
		658	0
		659.4	0
		660.8	0
		662.2	0
		663.6	0
		665	0
		666.4	0
		667.8	0
		669.2	0
		670.6	0
		672	0
		673.4	0
		674.8	0
		676.2	0
		677.6	0
		679	0
		680.4	0
		681.8	0
		683.2	0
		684.6	0
		686	0
		687.4	0
		688.8	0
		690.2	0
		691.6	0
		693	0
		694.4	0
		695.8	0
		697.2	0
		698.6	0
		700	0
		701.4	0
		702.8	0
		704.2	0
		705.6	0
		707	0
		708.4	0
		709.8	0
		711.2	0
		712.6	0
		714	0
		715.4	9.23577e-09
		716.8	2.62902e-08
		718.2	7.0871e-08
		719.6	1.80925e-07
		721	4.37406e-07
		722.4	1.00144e-06
		723.8	2.17131e-06
		725.2	4.45832e-06
		726.6	8.66917e-06
		728	1.59877e-05
		729.4	2.79695e-05
		730.8	4.65863e-05
		732.2	7.43532e-05
		733.6	0.000114902
		735	0.000174064
		736.4	0.000260495
		737.8	0.000383205
		739.2	0.000543483
		740.6	0.000723594
		742	0.00088231
		743.4	0.000968065
		744.8	0.000947521
		746.2	0.000832058
		747.6	0.000687018
		749	0.000617327
		750.4	0.000706607
		751.8	0.000906224
		753.2	0.00101222
		754.6	0.0008648
		756	0.000541948
		757.4	0.00024749
		758.8	8.39406e-05
		760.2	2.29078e-05
		761.6	6.72446e-06
		763	3.98e-06
		764.4	5.18905e-06
		765.8	8.98561e-06
		767.2	1.62243e-05
		768.6	2.86439e-05
		770	4.86903e-05
		771.4	7.93583e-05
		772.8	0.000123885
		774.2	0.000185169
		775.6	0.000265098
		777	0.00036403
		778.4	0.000480919
		779.8	0.000614792
		781.2	0.000767473
		782.6	0.000945257
		784	0.00115451
		785.4	0.00138825
		786.8	0.00161142
		788.2	0.00176337
		789.6	0.00178737
		791	0.00166855
		792.4	0.00144582
		793.8	0.00118722
		795.2	0.000956569
		796.6	0.000803337
		798	0.000768151
		799.4	0.000863308
		800.8	0.00102951
		802.2	0.00115432
		803.6	0.00118146
		805	0.00115513
		806.4	0.00110475
		807.8	0.00097038
		809.2	0.00071587
		810.6	0.00042896
		812	0.000247278
		813.4	0.000249877
		814.8	0.000428827
		816.2	0.000683131
		817.6	0.000844289
		819	0.000804534
		820.4	0.000635169
		821.8	0.000515227
		823.2	0.000545636
		824.6	0.000668216
		826	0.000743838
		827.4	0.000681368
		828.8	0.00050127
		830.2	0.000294726
		831.6	0.000138366
		833	5.18614e-05
		834.4	1.55256e-05
		835.8	3.7679e-06
		837.2	1.11884e-06
		838.6	2.35212e-06
		840	9.8511e-06
		841.4	3.46948e-05
		842.8	9.84527e-05
		844.2	0.000225072
		845.6	0.000415853
		847	0.000626534
		848.4	0.000787325
		849.8	0.000866527
		851.2	0.000900177
		852.6	0.00092913
		854	0.000923103
		855.4	0.000814123
		856.8	0.000601222
		858.2	0.0003766
		859.6	0.000250318
		861	0.000287612
		862.4	0.000510106
		863.8	0.000902596
		865.2	0.0013858
		866.6	0.00180015
		868	0.00196476
		869.4	0.00179474
		870.8	0.00137065
		872.2	0.000884428
		873.6	0.000518011
		875	0.000366366
		876.4	0.000428838
		877.8	0.000616222
		879.2	0.000773873
		880.6	0.000768923
		882	0.000592527
		883.4	0.000352726
		884.8	0.00016208
		886.2	5.74753e-05
		887.6	1.57287e-05
		889	3.3216e-06
		890.4	5.41307e-07
		891.8	6.80742e-08
		893.2	4.42031e-08
		894.6	2.18303e-07
		896	1.06444e-06
		897.4	4.35844e-06
		898.8	1.49862e-05
		900.2	4.32795e-05
		901.6	0.000104939
		903	0.000213673
		904.4	0.000365364
		905.8	0.000524648
		907.2	0.000632692
		908.6	0.000640825
		910	0.000545286
		911.4	0.000390133
		912.8	0.000235406
		914.2	0.000121387
		915.6	5.74383e-05
		917	3.55443e-05
		918.4	5.07858e-05
		919.8	0.00011327
		921.2	0.000241896
		922.6	0.00043675
		924	0.000648741
		925.4	0.00078828
		926.8	0.000787633
		928.2	0.000661097
		929.6	0.000494658
		931	0.000378632
		932.4	0.000357298
		933.8	0.000428583
		935.2	0.000563997
		936.6	0.000719196
		938	0.000841273
		939.4	0.000888128
		940.8	0.000853452
		942.2	0.000773933
		943.6	0.000706339
		945	0.000689198
		946.4	0.000717528
		947.8	0.000748562
		949.2	0.000732827
		950.6	0.000647161
		952	0.000506622
		953.4	0.000350085
		954.8	0.000214606
		956.2	0.000118463
		957.6	6.06134e-05
		959	3.01041e-05
		960.4	1.53296e-05
		961.8	8.30746e-06
		963.2	4.81227e-06
		964.6	3.10194e-06
		966	3.09201e-06
		967.4	6.86443e-06
		968.8	2.07837e-05
		970.2	5.79589e-05
		971.6	0.000136621
		973	0.000268353
		974.4	0.000438122
		975.8	0.000594242
		977.2	0.000669516
		978.6	0.000626574
		980	0.000487082
		981.4	0.000314517
		982.8	0.000168707
		984.2	7.52806e-05
		985.6	2.86755e-05
		987	1.3224e-05
		988.4	2.20691e-05
		989.8	6.692e-05
		991.2	0.000174556
		992.6	0.000359863
		994	0.000583066
		995.4	0.000742191
		996.8	0.000742191
		998.2	0.000583066
		999.6	0.000359851
		1001	0.000174474
		1002.4	6.6457e-05
		1003.8	1.98863e-05
		1005.2	4.67487e-06
		1006.6	8.63351e-07
		1008	1.25259e-07
		1009.4	1.42768e-08
		1010.8	0
		1012.2	0
		1013.6	0
		1015	0
		1016.4	0
		1017.8	0
		1019.2	0
		1020.6	0
		1022	0
		1023.4	0
		1024.8	0
		1026.2	0
		1027.6	0
		1029	0
		1030.4	0
		1031.8	0
		1033.2	0
		1034.6	0
		1036	0
		1037.4	0
		1038.8	0
		1040.2	0
		1041.6	0
		1043	2.15493e-08
		1044.4	1.35467e-07
		1045.8	7.11324e-07
		1047.2	3.11988e-06
		1048.6	1.14299e-05
		1050	3.4977e-05
		1051.4	8.9404e-05
		1052.8	0.000190883
		1054.2	0.000340417
		1055.6	0.000507097
		1057	0.000630966
		1058.4	0.000655776
		1059.8	0.000569299
		1061.2	0.000412819
		1062.6	0.000250043
		1064	0.000126504
		1065.4	5.34599e-05
		1066.8	1.88707e-05
		1068.2	5.56394e-06
		1069.6	1.37029e-06
		1071	2.81888e-07
		1072.4	4.84368e-08
		1073.8	6.952e-09
		1075.2	0
		1076.6	0
		1078	0
		1079.4	0
		1080.8	0
		1082.2	0
		1083.6	0
		1085	0
		1086.4	0
		1087.8	0
		1089.2	0
		1090.6	0
		1092	0
		1093.4	0
		1094.8	0
		1096.2	0
		1097.6	0
		1099	0
		1100.4	0
		1101.8	0
		1103.2	0
		1104.6	0
		1106	0
		1107.4	0
		1108.8	0
		1110.2	0
		1111.6	0
		1113	0
		1114.4	0
		1115.8	0
		1117.2	0
		1118.6	0
		1120	0
		1121.4	0
		1122.8	0
		1124.2	0
		1125.6	0
		1127	0
		1128.4	0
		1129.8	0
		1131.2	0
		1132.6	0
		1134	0
		1135.4	0
		1136.8	0
		1138.2	0
		1139.6	0
		1141	0
		1142.4	0
		1143.8	0
		1145.2	0
		1146.6	0
		1148	0
		1149.4	0
		1150.8	0
		1152.2	0
		1153.6	0
		1155	0
		1156.4	0
		1157.8	0
		1159.2	0
		1160.6	0
		1162	0
		1163.4	0
		1164.8	0
		1166.2	0
		1167.6	0
		1169	0
		1170.4	0
		1171.8	0
		1173.2	0
		1174.6	0
		1176	0
		1177.4	0
		1178.8	0
		1180.2	0
		1181.6	0
		1183	0
		1184.4	0
		1185.8	0
		1187.2	0
		1188.6	0
		1190	0
		1191.4	0
		1192.8	0
		1194.2	0
		1195.6	0
		1197	0
		1198.4	0
		1199.8	0
		1201.2	0
		1202.6	0
		1204	0
		1205.4	0
		1206.8	0
		1208.2	0
		1209.6	0
		1211	0
		1212.4	0
		1213.8	0
		1215.2	0
		1216.6	0
		1218	0
		1219.4	0
		1220.8	0
		1222.2	0
		1223.6	0
		1225	0
		1226.4	0
		1227.8	0
		1229.2	0
		1230.6	0
		1232	0
		1233.4	0
		1234.8	0
		1236.2	0
		1237.6	0
		1239	0
		1240.4	0
		1241.8	0
		1243.2	0
		1244.6	0
		1246	0
		1247.4	0
		1248.8	0
		1250.2	0
		1251.6	0
		1253	0
		1254.4	0
		1255.8	0
		1257.2	0
		1258.6	0
		1260	0
		1261.4	0
		1262.8	0
		1264.2	0
		1265.6	0
		1267	0
		1268.4	0
		1269.8	0
		1271.2	0
		1272.6	0
		1274	0
		1275.4	0
		1276.8	0
		1278.2	0
		1279.6	0
		1281	0
		1282.4	0
		1283.8	0
		1285.2	0
		1286.6	0
		1288	0
		1289.4	0
		1290.8	0
		1292.2	0
		1293.6	0
		1295	0
		1296.4	0
		1297.8	0
		1299.2	0
		1300.6	0
		1302	0
		1303.4	0
		1304.8	0
		1306.2	0
		1307.6	2.25033e-08
		1309	9.82763e-08
		1310.4	3.81957e-07
		1311.8	1.32112e-06
		1313.2	4.06662e-06
		1314.6	1.114e-05
		1316	2.71583e-05
		1317.4	5.89223e-05
		1318.8	0.000113768
		1320.2	0.000195489
		1321.6	0.000298943
		1323	0.000406833
		1324.4	0.000492727
		1325.8	0.000531079
		1327.2	0.000509425
		1328.6	0.000434896
		1330	0.000330515
		1331.4	0.00022395
		1332.8	0.000136462
		1334.2	7.83272e-05
		1335.6	5.15313e-05
		1337	5.57091e-05
		1338.4	9.21826e-05
		1339.8	0.000162862
		1341.2	0.000264308
		1342.6	0.000381192
		1344	0.000485539
		1345.4	0.00054558
		1346.8	0.000540699
		1348.2	0.000472609
		1349.6	0.000364328
		1351	0.0002477
		1352.4	0.000148526
		1353.8	7.8546e-05
		1355.2	3.66344e-05
		1356.6	1.50694e-05
		1358	5.46699e-06
		1359.4	1.74921e-06
		1360.8	4.93607e-07
		1362.2	1.22847e-07
		1363.6	2.69643e-08
		1365	0
		1366.4	0
		1367.8	0
		1369.2	0
		1370.6	0
		1372	0
		1373.4	0
		1374.8	0
		1376.2	0
		1377.6	0
		1379	0
		1380.4	0
		1381.8	0
		1383.2	0
		1384.6	0
		1386	0
		1387.4	0
		1388.8	0
		1390.2	0
		1391.6	0
		1393	1.29296e-08
		1394.4	3.98111e-08
		1395.8	1.14891e-07
		1397.2	3.1076e-07
		1398.6	7.87819e-07
		1400	1.87193e-06
		1401.4	4.1688e-06
		1402.8	8.70151e-06
		1404.2	1.70231e-05
		1405.6	3.12136e-05
		1407	5.36424e-05
		1408.4	8.6404e-05
		1409.8	0.000130443
		1411.2	0.000184573
		1412.6	0.000244779
		1414	0.000304258
		1415.4	0.000354463
		1416.8	0.000387044
		1418.2	0.000396105
		1419.6	0.000379945
		1421	0.000341579
		1422.4	0.000287821
		1423.8	0.000227308
		1425.2	0.000168255
		1426.6	0.00011673
		1428	7.59023e-05
		1429.4	4.62583e-05
		1430.8	2.64232e-05
		1432.2	1.41462e-05
		1433.6	7.09834e-06
		1435	3.33836e-06
		1436.4	1.47154e-06
		1437.8	6.07952e-07
		1439.2	2.35411e-07
		1440.6	8.54372e-08
		1442	2.90621e-08
		1443.4	9.26546e-09
		1444.8	0
		1446.2	0
		1447.6	0
		1449	0
		1450.4	0
		1451.8	0
		1453.2	0
		1454.6	0
		1456	0
		1457.4	0
		1458.8	0
		1460.2	0
		1461.6	0
		1463	0
		1464.4	0
		1465.8	0
		1467.2	0
		1468.6	0
		1470	0
		1471.4	0
		1472.8	0
		1474.2	0
		1475.6	0
		1477	0
		1478.4	0
		1479.8	0
		1481.2	0
		1482.6	0
		1484	0
		1485.4	0
		1486.8	0
		1488.2	0
		1489.6	0
		1491	0
		1492.4	0
		1493.8	0
		1495.2	0
		1496.6	0
		1498	1.10829e-08
		1499.4	3.86368e-08
		1500.8	1.24537e-07
		1502.2	3.7115e-07
		1503.6	1.0227e-06
		1505	2.60557e-06
		1506.4	6.1377e-06
		1507.8	1.33678e-05
		1509.2	2.69195e-05
		1510.6	5.01215e-05
		1512	8.62845e-05
		1513.4	0.000137339
		1514.8	0.000202118
		1516.2	0.000275022
		1517.6	0.000346004
		1519	0.000402482
		1520.4	0.000432876
		1521.8	0.000430458
		1523.2	0.000395777
		1524.6	0.00033645
		1526	0.000264449
		1527.4	0.000192183
		1528.8	0.000129134
		1530.2	8.02262e-05
		1531.6	4.60833e-05
		1533	2.4475e-05
		1534.4	1.20185e-05
		1535.8	5.45673e-06
		1537.2	2.29068e-06
		1538.6	8.89096e-07
		1540	3.19068e-07
		1541.4	1.05869e-07
		1542.8	3.24794e-08
		1544.2	9.21291e-09
		1545.6	0
		1547	0
		1548.4	0
		1549.8	0
		1551.2	0
		1552.6	0
		1554	0
		1555.4	0
		1556.8	0
		1558.2	0
		1559.6	0
		1561	0
		1562.4	0
		1563.8	0
		1565.2	0
		1566.6	0
		1568	0
		1569.4	0
		1570.8	0
		1572.2	0
		1573.6	0
		1575	0
		1576.4	0
		1577.8	0
		1579.2	0
		1580.6	0
		1582	0
		1583.4	0
		1584.8	0
		1586.2	0
		1587.6	0
		1589	0
		1590.4	0
		1591.8	0
		1593.2	0
		1594.6	0
		1596	0
		1597.4	0
		1598.8	0
		1600.2	0
		1601.6	0
		1603	0
		1604.4	0
		1605.8	0
		1607.2	0
		1608.6	0
		1610	0
		1611.4	0
		1612.8	0
		1614.2	0
		1615.6	0
		1617	0
		1618.4	0
		1619.8	0
		1621.2	0
		1622.6	5.87997e-09
		1624	1.0164e-08
		1625.4	1.73107e-08
		1626.8	2.90489e-08
		1628.2	4.80295e-08
		1629.6	7.82439e-08
		1631	1.2559e-07
		1632.4	1.98621e-07
		1633.8	3.09499e-07
		1635.2	4.75177e-07
		1636.6	7.18812e-07
		1638	1.07137e-06
		1639.4	1.57335e-06
		1640.8	2.27655e-06
		1642.2	3.24558e-06
		1643.6	4.559e-06
		1645	6.30974e-06
		1646.4	8.60432e-06
		1647.8	1.15607e-05
		1649.2	1.53045e-05
		1650.6	1.99624e-05
		1652	2.56551e-05
		1653.4	3.2486e-05
		1654.8	4.05306e-05
		1656.2	4.98234e-05
		1657.6	6.03458e-05
		1659	7.20152e-05
		1660.4	8.46769e-05
		1661.8	9.81001e-05
		1663.2	0.000111979
		1664.6	0.000125942
		1666	0.000139561
		1667.4	0.000152378
		1668.8	0.000163925
		1670.2	0.000173753
		1671.6	0.00018146
		1673	0.000186722
		1674.4	0.000189309
		1675.8	0.000189109
		1677.2	0.000186129
		1678.6	0.000180502
		1680	0.00017247
		1681.4	0.000162371
		1682.8	0.000150614
		1684.2	0.000137654
		1685.6	0.000123958
		1687	0.000109982
		1688.4	9.61576e-05
		1689.8	8.28597e-05
		1691.2	7.04473e-05
		1692.6	5.93202e-05
		1694	5.00899e-05
		1695.4	4.38961e-05
		1696.8	4.28653e-05
		1698.2	5.05415e-05
		1699.6	7.18593e-05
		1701	0.000112058
		1702.4	0.000174187
		1703.8	0.000255747
		1705.2	0.000346246
		1706.6	0.000427929
		1708	0.000480765
		1709.4	0.000490086
		1710.8	0.000452918
		1712.2	0.000379328
		1713.6	0.000287875
		1715	0.000197992
		1716.4	0.0001235
		1717.8	7.0062e-05
		1719.2	3.65327e-05
		1720.6	1.8226e-05
		1722	9.94116e-06
		1723.4	7.67437e-06
		1724.8	9.04953e-06
		1726.2	1.30298e-05
		1727.6	1.94436e-05
		1729	2.85725e-05
		1730.4	4.08804e-05
		1731.8	5.69033e-05
		1733.2	7.71544e-05
		1734.6	0.000102209
		1736	0.00013283
		1737.4	0.000170177
		1738.8	0.000215862
		1740.2	0.000271742
		1741.6	0.000339112
		1743	0.00041738
		1744.4	0.0005027
		1745.8	0.000587425
		1747.2	0.000661227
		1748.6	0.000714081
		1750	0.000740009
		1751.4	0.000739717
		1752.8	0.000720353
		1754.2	0.000692124
		1755.6	0.000663365
		1757	0.000636838
		1758.4	0.000609315
		1759.8	0.00057466
		1761.2	0.000528498
		1762.6	0.000471782
		1764	0.000411406
		1765.4	0.000357862
		1766.8	0.000321447
		1768.2	0.000308976
		1769.6	0.000322201
		1771	0.000358067
		1772.4	0.000410066
		1773.8	0.000469888
		1775.2	0.000528796
		1776.6	0.000578583
		1778	0.00061238
		1779.4	0.000625339
		1780.8	0.000615316
		1782.2	0.000583391
		1783.6	0.000533967
		1785	0.000474357
		1786.4	0.000413749
		1787.8	0.000361793
		1789.2	0.000327141
		1790.6	0.000316247
		1792	0.000332749
		1793.4	0.000377578
		1794.8	0.000449693
		1796.2	0.00054704
		1797.6	0.000667127
		1799	0.00080645
		1800.4	0.000958651
		1801.8	0.00111199
		1803.2	0.00124812
		1804.6	0.00134398
		1806	0.00137764
		1807.4	0.00133616
		1808.8	0.0012216
		1810.2	0.00105174
		1811.6	0.000854891
		1813	0.000661295
		1814.4	0.000495462
		1815.8	0.000372314
		1817.2	0.000297631
		1818.6	0.000270993
		1820	0.000288961
		1821.4	0.000347076
		1822.8	0.000440306
		1824.2	0.000562603
		1825.6	0.000706389
		1827	0.000862744
		1828.4	0.00102245
		1829.8	0.00117757
		1831.2	0.00132299
		1832.6	0.00145711
		1834	0.00158166
		1835.4	0.00170054
		1836.8	0.00181825
		1838.2	0.00193799
		1839.6	0.0020598
		1841	0.00217885
		1842.4	0.00228503
		1843.8	0.00236499
		1845.2	0.00240721
		1846.6	0.00240857
		1848	0.00237908
		1849.4	0.0023411
		1850.8	0.00232284
		1852.2	0.00234892
		1853.6	0.00243295
		1855	0.00257548
		1856.4	0.00276661
		1857.8	0.00298977
		1859.2	0.00322354
		1860.6	0.00344142
		1862	0.00361244
		1863.4	0.00370553
		1864.8	0.00369786
		1866.2	0.00358345
		1867.6	0.00337724
		1869	0.0031117
		1870.4	0.00282663
		1871.8	0.00255638
		1873.2	0.00231949
		1874.6	0.00211525
		1876	0.0019287
		1877.4	0.00174207
		1878.8	0.00154671
		1880.2	0.00134914
		1881.6	0.0011677
		1883	0.00102219
		1884.4	0.000923034
		1885.8	0.00086614
		1887.2	0.000835689
		1888.6	0.000812164
		1890	0.000780863
		1891.4	0.00073685
		1892.8	0.000684934
		1894.2	0.0006358
		1895.6	0.000600945
		1897	0.000588544
		1898.4	0.000601645
		1899.8	0.000638529
		1901.2	0.000694149
		1902.6	0.000761667
		1904	0.000833473
		1905.4	0.000901578
		1906.8	0.000957896
		1908.2	0.000994893
		1909.6	0.00100686
		1911	0.000991649
		1912.4	0.000952222
		1913.8	0.000897234
		1915.2	0.000840018
		1916.6	0.000795844
		1918	0.000778093
		1919.4	0.00079441
		1920.8	0.000844038
		1922.2	0.000917386
		1923.6	0.000998031
		1925	0.0010667
		1926.4	0.00110601
		1927.8	0.00110461
		1929.2	0.00105936
		1930.6	0.000975158
		1932	0.000862787
		1933.4	0.000735669
		1934.8	0.000606754
		1936.2	0.000486407
		1937.6	0.000381603
		1939	0.000296271
		1940.4	0.000232197
		1941.8	0.000190037
		1943.2	0.00016991
		1944.6	0.00017136
		1946	0.000192808
		1947.4	0.000230715
		1948.8	0.000279005
		1950.2	0.000329202
		1951.6	0.000371618
		1953	0.000397335
		1954.4	0.000400433
		1955.8	0.000379569
		1957.2	0.000338313
		1958.6	0.000284085
		1960	0.000226126
		1961.4	0.000173349
		1962.8	0.000132736
		1964.2	0.000108639
		1965.6	0.000102847
		1967	0.000115008
		1968.4	0.000143046
		1969.8	0.000183323
		1971.2	0.000230747
		1972.6	0.000279006
		1974	0.000321198
		1975.4	0.000350863
		1976.8	0.000363217
		1978.2	0.000356173
		1979.6	0.000330783
		1981	0.000290937
		1982.4	0.000242337
		1983.8	0.000191159
		1985.2	0.000142799
		1986.6	0.000101021
		1988	6.76788e-05
		1989.4	4.29387e-05
		1990.8	2.57988e-05
		1992.2	1.46793e-05
		1993.6	7.90983e-06
		1995	4.0363e-06
		1996.4	1.95054e-06
		1997.8	8.9265e-07
		1999.2	3.86868e-07
		2000.6	1.58781e-07
		2002	6.17151e-08
		2003.4	2.27163e-08
		2004.8	7.91845e-09
		2006.2	0
		2007.6	0
		2009	0
		2010.4	0
		2011.8	0
		2013.2	0
		2014.6	0
		2016	0
		2017.4	0
		2018.8	0
		2020.2	0
		2021.6	0
		2023	0
		2024.4	0
		2025.8	0
		2027.2	0
		2028.6	0
		2030	0
		2031.4	0
		2032.8	0
		2034.2	0
		2035.6	0
		2037	0
		2038.4	9.23577e-09
		2039.8	2.62902e-08
		2041.2	7.0871e-08
		2042.6	1.80925e-07
		2044	4.37406e-07
		2045.4	1.00144e-06
		2046.8	2.17131e-06
		2048.2	4.45832e-06
		2049.6	8.66917e-06
		2051	1.59639e-05
		2052.4	2.78391e-05
		2053.8	4.59754e-05
		2055.2	7.19038e-05
		2056.6	0.000106496
		2058	0.000149372
		2059.4	0.000198409
		2060.8	0.000249578
		2062.2	0.000297309
		2063.6	0.000335402
		2065	0.000358325
		2066.4	0.00036253
		2067.8	0.000347349
		2069.2	0.000315168
		2070.6	0.000270816
		2072	0.000220375
		2073.4	0.000169826
		2074.8	0.000123951
		2076.2	8.56909e-05
		2077.6	5.61488e-05
		2079	3.49532e-05
		2080.4	2.08561e-05
		2081.8	1.23204e-05
		2083.2	7.97245e-06
		2084.6	6.8766e-06
		2086	8.65437e-06
		2087.4	1.34893e-05
		2088.8	2.20479e-05
		2090.2	3.53246e-05
		2091.6	5.44012e-05
		2093	8.01192e-05
		2094.4	0.000112689
		2095.8	0.000151343
		2097.2	0.000194041
		2098.6	0.000237507
		2100	0.000277532
		2101.4	0.000309601
		2102.8	0.00032972
		2104.2	0.000335229
		2105.6	0.000325379
		2107	0.000301502
		2108.4	0.000266713
		2109.8	0.000225243
		2111.2	0.000181598
		2112.6	0.000139773
		2114	0.000102704
		2115.4	7.20455e-05
		2116.8	4.82478e-05
		2118.2	3.08462e-05
		2119.6	1.88269e-05
		2121	1.097e-05
		2122.4	6.10226e-06
		2123.8	3.2406e-06
		2125.2	1.64291e-06
		2126.6	7.95161e-07
		2128	3.67408e-07
		2129.4	1.62067e-07
		2130.8	6.82488e-08
		2132.2	2.74377e-08
		2133.6	1.05306e-08
		2135	0
		2136.4	0
		2137.8	0
		2139.2	0
		2140.6	0
		2142	0
		2143.4	0
		2144.8	0
		2146.2	0
		2147.6	0
		2149	0
		2150.4	0
		2151.8	0
		2153.2	0
		2154.6	0
		2156	0
		2157.4	0
		2158.8	0
		2160.2	0
		2161.6	0
		2163	0
		2164.4	0
		2165.8	0
		2167.2	0
		2168.6	0
		2170	0
		2171.4	0
		2172.8	0
		2174.2	0
		2175.6	0
		2177	0
		2178.4	0
		2179.8	0
		2181.2	0
		2182.6	0
		2184	0
		2185.4	0
		2186.8	0
		2188.2	0
		2189.6	0
		2191	0
		2192.4	0
		2193.8	0
		2195.2	0
		2196.6	0
		2198	0
		2199.4	0
		2200.8	0
		2202.2	0
		2203.6	0
		2205	0
		2206.4	0
		2207.8	0
		2209.2	0
		2210.6	0
		2212	0
		2213.4	0
		2214.8	0
		2216.2	0
		2217.6	0
		2219	0
		2220.4	0
		2221.8	0
		2223.2	0
		2224.6	0
		2226	0
		2227.4	0
		2228.8	0
		2230.2	0
		2231.6	0
		2233	0
		2234.4	0
		2235.8	7.42069e-09
		2237.2	1.43472e-08
		2238.6	2.71429e-08
		2240	5.02474e-08
		2241.4	9.10206e-08
		2242.8	1.61337e-07
		2244.2	2.79832e-07
		2245.6	4.74928e-07
		2247	7.88728e-07
		2248.4	1.28172e-06
		2249.8	2.03812e-06
		2251.2	3.17128e-06
		2252.6	4.82843e-06
		2254	7.19361e-06
		2255.4	1.04871e-05
		2256.8	1.496e-05
		2258.2	2.08822e-05
		2259.6	2.85227e-05
		2261	3.81217e-05
		2262.4	4.98565e-05
		2263.8	6.38028e-05
		2265.2	7.98961e-05
		2266.6	9.78994e-05
		2268	0.000117382
		2269.4	0.000137719
		2270.8	0.000158108
		2272.2	0.000177615
		2273.6	0.000195243
		2275	0.00021001
		2276.4	0.00022104
		2277.8	0.000227652
		2279.2	0.000229425
		2280.6	0.000226244
		2282	0.000218314
		2283.4	0.000206137
		2284.8	0.000190457
		2286.2	0.000172195
		2287.6	0.000152344
		2289	0.000131898
		2290.4	0.000111768
		2291.8	9.27306e-05
		2293.2	7.53912e-05
		2294.6	6.01859e-05
		2296	4.74027e-05
		2297.4	3.72247e-05
		2298.8	2.97979e-05
		2300.2	2.52602e-05
		2301.6	2.38348e-05
		2303	2.58399e-05
		2304.4	3.16948e-05
		2305.8	4.18773e-05
		2307.2	5.68349e-05
		2308.6	7.6856e-05
		2310	0.00010192
		2311.4	0.000131556
		2312.8	0.000164756
		2314.2	0.00019997
		2315.6	0.000235218
		2317	0.000268312
		2318.4	0.000297162
		2319.8	0.0003201
		2321.2	0.000336155
		2322.6	0.000345204
		2324	0.000347958
		2325.4	0.000345785
		2326.8	0.000340382
		2328.2	0.000333418
		2329.6	0.000326194
		2331	0.000319412
		2332.4	0.000313095
		2333.8	0.000306677
		2335.2	0.000299202
		2336.6	0.000289603
		2338	0.000276975
		2339.4	0.000260786
		2340.8	0.000240994
		2342.2	0.000218053
		2343.6	0.000192826
		2345	0.000166435
		2346.4	0.000140087
		2347.8	0.000114905
		2349.2	9.18068e-05
		2350.6	7.14295e-05
		2352	5.41077e-05
		2353.4	3.98991e-05
		2354.8	2.86385e-05
		2356.2	2.0003e-05
		2357.6	1.36028e-05
		2359	9.00285e-06
		2360.4	5.79896e-06
		2361.8	3.63529e-06
		2363.2	2.21793e-06
		2364.6	1.31696e-06
		2366	7.61057e-07
		2367.4	4.28036e-07
		2368.8	2.34294e-07
		2370.2	1.24813e-07
		2371.6	6.47111e-08
		2373	3.26524e-08
		2374.4	1.60351e-08
		2375.8	7.6638e-09
		2377.2	0
		2378.6	0
		2380	0
		2381.4	0
		2382.8	0
		2384.2	0
		2385.6	0
		2387	0
		2388.4	0
		2389.8	0
		2391.2	0
		2392.6	0
		2394	0
		2395.4	6.07659e-09
		2396.8	1.51178e-08
		2398.2	3.61364e-08
		2399.6	8.91479e-08
		2401	1.95565e-07
		2402.4	4.12766e-07
		2403.8	8.38023e-07
		2405.2	1.63636e-06
		2406.6	3.07276e-06
		2408	5.54852e-06
		2409.4	9.63422e-06
		2410.8	1.60862e-05
		2412.2	2.58292e-05
		2413.6	3.98871e-05
		2415	5.92561e-05
		2416.4	8.46927e-05
		2417.8	0.000116503
		2419.2	0.000154313
		2420.6	0.00019693
		2422	0.00024235
		2423.4	0.000287962
		2424.8	0.000330919
		2426.2	0.000368687
		2427.6	0.000399576
		2429	0.000423131
		2430.4	0.000440374
		2431.8	0.000453622
		2433.2	0.000466053
		2434.6	0.000480987
		2436	0.000501192
		2437.4	0.000528264
		2438.8	0.000562338
		2440.2	0.000602241
		2441.6	0.000646025
		2443	0.000691683
		2444.4	0.00073793
		2445.8	0.000784594
		2447.2	0.000832563
		2448.6	0.000883187
		2450	0.000937437
		2451.4	0.000995054
		2452.8	0.00105411
		2454.2	0.00111119
		2455.6	0.00116218
		2457	0.00120338
		2458.4	0.00123257
		2459.8	0.00124961
		2461.2	0.00125634
		2462.6	0.00125595
		2464	0.00125183
		2465.4	0.00124649
		2466.8	0.00124087
		2468.2	0.00123413
		2469.6	0.001224
		2471	0.00120757
		2472.4	0.00118221
		2473.8	0.00114643
		2475.2	0.00110038
		2476.6	0.00104613
		2478	0.000987584
		2479.4	0.000930112
		2480.8	0.000880128
		2482.2	0.000844388
		2483.6	0.00082909
		2485	0.000838734
		2486.4	0.00087479
		2487.8	0.0009346
		2489.2	0.00101092
		2490.6	0.00109257
		2492	0.00116635
		2493.4	0.00121988
		2494.8	0.00124447
		2496.2	0.00123705
		2497.6	0.0012006
		2499	0.00114265
		2500.4	0.00107297
		2501.8	0.00100084
		2503.2	0.000933094
		2504.6	0.000873251
		2506	0.00082163
		2507.4	0.000776279
		2508.8	0.000734087
		2510.2	0.000691819
		2511.6	0.000646888
		2513	0.000597763
		2514.4	0.000544082
		2515.8	0.000486531
		2517.2	0.00042659
		2518.6	0.000366204
		2520	0.000307436
		2521.4	0.000252191
		2522.8	0.000202001
		2524.2	0.0001579
		2525.6	0.000120397
		2527	8.9512e-05
		2528.4	6.48777e-05
		2529.8	4.58242e-05
		2531.2	3.15476e-05
		2532.6	2.11748e-05
		2534	1.38722e-05
		2535.4	8.89353e-06
		2536.8	5.62373e-06
		2538.2	3.56697e-06
		2539.6	2.35813e-06
		2541	1.74181e-06
		2542.4	1.55356e-06
		2543.8	1.69805e-06
		2545.2	2.14795e-06
		2546.6	2.90452e-06
		2548	4.0101e-06
		2549.4	5.53379e-06
		2550.8	7.56642e-06
		2552.2	1.02128e-05
		2553.6	1.35954e-05
		2555	1.78462e-05
		2556.4	2.30815e-05
		2557.8	2.94134e-05
		2559.2	3.6931e-05
		2560.6	4.56877e-05
		2562	5.56893e-05
		2563.4	6.68818e-05
		2564.8	7.9142e-05
		2566.2	9.2272e-05
		2567.6	0.000105998
		2569	0.000119974
		2570.4	0.000133795
		2571.8	0.000147014
		2573.2	0.000159162
		2574.6	0.000169779
		2576	0.000178439
		2577.4	0.000184783
		2578.8	0.000188537
		2580.2	0.000189538
		2581.6	0.000187747
		2583	0.000183234
		2584.4	0.000176201
		2585.8	0.000166947
		2587.2	0.000155857
		2588.6	0.000143368
		2590	0.000129949
		2591.4	0.000116064
		2592.8	0.000102156
		2594.2	8.86171e-05
		2595.6	7.57769e-05
		2597	6.38937e-05
		2598.4	5.31507e-05
		2599.8	4.36589e-05
		2601.2	3.54647e-05
		2602.6	2.85603e-05
		2604	2.2896e-05
		2605.4	1.83932e-05
		2606.8	1.49563e-05
		2608.2	1.24838e-05
		2609.6	1.08766e-05
		2611	1.0045e-05
		2612.4	9.9125e-06
		2613.8	1.04183e-05
		2615.2	1.15175e-05
		2616.6	1.31804e-05
		2618	1.53899e-05
		2619.4	1.81388e-05
		2620.8	2.14265e-05
		2622.2	2.52551e-05
		2623.6	2.96257e-05
		2625	3.45353e-05
		2626.4	3.99726e-05
		2627.8	4.5916e-05
		2629.2	5.23305e-05
		2630.6	5.91662e-05
		2632	6.63571e-05
		2633.4	7.38168e-05
		2634.8	8.14563e-05
		2636.2	8.91562e-05
		2637.6	9.6791e-05
		2639	0.000104226
		2640.4	0.00011132
		2641.8	0.000117931
		2643.2	0.000123919
		2644.6	0.000129154
		2646	0.000133516
		2647.4	0.000136903
		2648.8	0.000139237
		2650.2	0.000140459
		2651.6	0.000140541
		2653	0.00013948
		2654.4	0.000137303
		2655.8	0.000134061
		2657.2	0.000129833
		2658.6	0.000124716
		2660	0.000118828
		2661.4	0.000112297
		2662.8	0.000105263
		2664.2	9.78686e-05
		2665.6	9.02539e-05
		2667	8.25554e-05
		2668.4	7.49e-05
		2669.8	6.74024e-05
		2671.2	6.01625e-05
		2672.6	5.32639e-05
		2674	4.67733e-05
		2675.4	4.07398e-05
		2676.8	3.51963e-05
		2678.2	3.01601e-05
		2679.6	2.56345e-05
		2681	2.16109e-05
		2682.4	1.80709e-05
		2683.8	1.4988e-05
		2685.2	1.233e-05
		2686.6	1.0061e-05
		2688	8.14279e-06
		2689.4	6.53678e-06
		2690.8	5.20489e-06
		2692.2	4.11071e-06
		2693.6	3.22016e-06
		2695	2.50205e-06
		2696.4	1.92829e-06
		2697.8	1.47402e-06
		2699.2	1.11762e-06
		2700.6	8.40505e-07
		2702	6.26966e-07
		2703.4	4.63878e-07
		2704.8	3.40425e-07
		2706.2	2.47797e-07
		2707.6	1.78907e-07
		2709	1.28119e-07
		2710.4	9.10039e-08
		2711.8	6.41154e-08
		2713.2	4.48044e-08
		2714.6	3.10554e-08
		2716	2.13506e-08
		2717.4	1.45593e-08
		2718.8	9.84751e-09
		2720.2	6.60648e-09
		2721.6	0
		2723	0
		2724.4	0
		2725.8	0
		2727.2	0
		2728.6	0
		2730	0
		2731.4	0
		2732.8	0
		2734.2	0
		2735.6	0
		2737	0
		2738.4	0
		2739.8	0
		2741.2	0
		2742.6	0
		2744	0
		2745.4	0
		2746.8	0
		2748.2	0
		2749.6	0
		2751	0
		2752.4	0
		2753.8	0
		2755.2	0
		2756.6	0
		2758	0
		2759.4	0
		2760.8	0
		2762.2	0
		2763.6	0
		2765	0
		2766.4	0
		2767.8	0
		2769.2	0
		2770.6	0
		2772	0
		2773.4	0
		2774.8	0
		2776.2	0
		2777.6	0
		2779	0
		2780.4	0
		2781.8	0
		2783.2	0
		2784.6	0
		2786	0
		2787.4	0
		2788.8	0
		2790.2	0
		2791.6	0
		2793	0
		2794.4	0
		2795.8	0
		2797.2	0
		2798.6	0
[truncated: 1 more rows]

## Sheet: PlotDat9
Source sheet	Sheet3	0	0	150	0	0	0
Plot name	ProbDens6	1.5	0	225	0	2998.5	0
Plot Type	16	3	0	225	2
1st free col	9	4.5	0	150	2
Sigma Level	2	6	0	150	0
Absolute Errs	TRUE	7.5	0	ErrBox	ErrBox
Symbol Type	1	9	0	225	0
Inverse Plot	FALSE	10.5	0	300	0
Color Plot	TRUE	12	0	300	46
3D plot	FALSE	13.5	0	225	46
Linear	FALSE	15	0	225	0
Data Range	M1:N304	16.5	0	ErrBox	ErrBox
Filled Symbols	FALSE	18	0	300	0
ConcAge	FALSE	19.5	0	375	0
ConcSwap	FALSE	21	0	375	19
1st Symbol-row	1	22.5	0	300	19
		24	0	300	0
		25.5	0	ErrBox	ErrBox
		27	0	375	0
		28.5	0	450	0
		30	0	450	54
		31.5	0	375	54
		33	0	375	0
		34.5	0	ErrBox	ErrBox
		36	0	450	0
		37.5	0	525	0
		39	0	525	25
		40.5	0	450	25
		42	0	450	0
		43.5	0	ErrBox	ErrBox
		45	0	525	0
		46.5	0	600	0
		48	0	600	7
		49.5	0	525	7
		51	0	525	0
		52.5	0	ErrBox	ErrBox
		54	0	600	0
		55.5	0	675	0
		57	0	675	3
		58.5	0	600	3
		60	0	600	0
		61.5	0	ErrBox	ErrBox
		63	0	675	0
		64.5	0	750	0
		66	0	750	5
		67.5	0	675	5
		69	0	675	0
		70.5	0	ErrBox	ErrBox
		72	0	750	0
		73.5	0	825	0
		75	0	825	32
		76.5	0	750	32
		78	0	750	0
		79.5	0	ErrBox	ErrBox
		81	0	825	0
		82.5	0	900	0
		84	0	900	13
		85.5	0	825	13
		87	0	825	0
		88.5	0	ErrBox	ErrBox
		90	0	900	0
		91.5	0	975	0
		93	0	975	13
		94.5	0	900	13
		96	0	900	0
		97.5	0	ErrBox	ErrBox
		99	0	975	0
		100.5	0	1050	0
		102	0	1050	5
		103.5	0	975	5
		105	0	975	0
		106.5	0	ErrBox	ErrBox
		108	0	1050	0
		109.5	0	1125	0
		111	0	1125	2
		112.5	0	1050	2
		114	0	1050	0
		115.5	0	ErrBox	ErrBox
		117	0	1275	0
		118.5	0	1350	0
		120	0	1350	1
		121.5	0	1275	1
		123	0	1275	0
		124.5	0	ErrBox	ErrBox
		126	0	1425	0
		127.5	0	1500	0
		129	0	1500	6
		130.5	0	1425	6
		132	0	1425	0
		133.5	0	ErrBox	ErrBox
		135	0	1500	0
		136.5	0	1575	0
		138	0	1575	1
		139.5	0	1500	1
		141	0	1500	0
		142.5	0	ErrBox	ErrBox
		144	0	1650	0
		145.5	0	1725	0
		147	0	1725	6
		148.5	0	1650	6
		150	0	1650	0
		151.5	0	ErrBox	ErrBox
		153	0	1725	0
		154.5	0	1800	0
		156	0	1800	2
		157.5	0	1725	2
		159	0	1725	0
		160.5	0	ErrBox	ErrBox
		162	0	1800	0
		163.5	0	1875	0
		165	0	1875	26
		166.5	0	1800	26
		168	0	1800	0
		169.5	0	ErrBox	ErrBox
		171	0	1875	0
		172.5	0	1950	0
		174	0	1950	15
		175.5	0	1875	15
		177	0	1875	0
		178.5	0	ErrBox	ErrBox
		180	0	1950	0
		181.5	0	2025	0
		183	0	2025	3
		184.5	0	1950	3
		186	0	1950	0
		187.5	0	ErrBox	ErrBox
		189	0	2025	0
		190.5	0	2100	0
		192	0	2100	1
		193.5	0	2025	1
		195	0	2025	0
		196.5	0	ErrBox	ErrBox
		198	0	2250	0
		199.5	0	2325	0
		201	0	2325	1
		202.5	0	2250	1
		204	0	2250	0
		205.5	0	ErrBox	ErrBox
		207	0	2325	0
		208.5	0	2400	0
		210	6.418e-08	2400	2
		211.5	1.0619e-06	2325	2
		213	1.05484e-05	2325	0
		214.5	6.29375e-05	ErrBox	ErrBox
		216	0.000225925	2400	0
		217.5	0.000493911	2475	0
		219	0.000703179	2475	5
		220.5	0.000833741	2400	5
		222	0.00111945	2400	0
		223.5	0.0015036	ErrBox	ErrBox
		225	0.00164378	2475	0
		226.5	0.00131046	2550	0
		228	0.000746297	2550	7
		229.5	0.000556701	2475	7
		231	0.000833022	2475	0
		232.5	0.00123421	ErrBox	ErrBox
		234	0.00175233	2700	0
		235.5	0.00241885	2775	0
		237	0.00275346	2775	1
		238.5	0.00246415	2700	1
		240	0.00208364	2700	0
		241.5	0.00228681	ErrBox	ErrBox
		243	0.00288611	2775	0
		244.5	0.00317399	2850	0
		246	0.00309096	2850	1
		247.5	0.00306248	2775	1
		249	0.00318929	2775	0
		250.5	0.00341788	ErrBox	ErrBox
		252	0.00361325
		253.5	0.00339468
		255	0.00282599
		256.5	0.00263544
		258	0.00271059
		259.5	0.00260827
		261	0.0026437
		262.5	0.00273953
		264	0.00262749
		265.5	0.00226482
		267	0.00183629
		268.5	0.00155917
		270	0.00162341
		271.5	0.00170016
		273	0.00140749
		274.5	0.00109228
		276	0.00113334
		277.5	0.00171003
		279	0.00239383
		280.5	0.00253567
		282	0.00206993
		283.5	0.00148987
		285	0.00120693
		286.5	0.00124162
		288	0.00140369
		289.5	0.00150239
		291	0.00146681
		292.5	0.00134977
		294	0.00121531
		295.5	0.00108358
		297	0.000926482
		298.5	0.000702545
		300	0.000451262
		301.5	0.000297576
		303	0.000336841
		304.5	0.000570806
		306	0.000962471
		307.5	0.00143187
		309	0.00175217
		310.5	0.0018139
		312	0.00184393
		313.5	0.00196906
		315	0.00208856
		316.5	0.00216872
		318	0.00226402
		319.5	0.00229054
		321	0.002007
		322.5	0.00142998
		324	0.000911909
		325.5	0.00066064
		327	0.000596561
		328.5	0.000582703
		330	0.000567566
		331.5	0.000567931
		333	0.000594038
		334.5	0.000628518
		336	0.000653124
		337.5	0.000643285
		339	0.000568272
		340.5	0.000474451
		342	0.000526588
		343.5	0.000723362
		345	0.000702517
		346.5	0.000379443
		348	0.000108215
		349.5	1.71269e-05
		351	6.41559e-06
		352.5	1.94899e-05
		354	5.85484e-05
		355.5	0.000146204
		357	0.000318069
		358.5	0.000605073
		360	0.000923033
		361.5	0.0010139
		363	0.000764453
		364.5	0.000456903
		366	0.000441537
		367.5	0.000766292
		369	0.00110174
		370.5	0.00108364
		372	0.000791252
		373.5	0.0005427
		375	0.000458691
		376.5	0.000474647
		378	0.000511147
		379.5	0.000541302
		381	0.000571615
		382.5	0.000606419
		384	0.000650574
		385.5	0.000731303
		387	0.000886638
		388.5	0.00112475
		390	0.00140127
		391.5	0.00163503
		393	0.00175317
		394.5	0.00173904
		396	0.00164002
		397.5	0.00154162
		399	0.00154997
		400.5	0.0016641
		402	0.00162811
		403.5	0.001323
		405	0.00108948
		406.5	0.00121461
		408	0.00159753
		409.5	0.00199036
		411	0.00221781
		412.5	0.00221327
		414	0.00211629
		415.5	0.00214556
		417	0.002323
		418.5	0.00252496
		420	0.00264144
		421.5	0.00263694
		423	0.00257112
		424.5	0.00258568
		426	0.00283853
		427.5	0.00338466
		429	0.00406344
		430.5	0.00455277
		432	0.00462772
		433.5	0.00434488
		435	0.00395415
		436.5	0.00372026
		438	0.00379662
		439.5	0.0041053
		441	0.00436232
		442.5	0.00434123
		444	0.00404846
		445.5	0.00361343
		447	0.00313771
		448.5	0.0026866
		450	0.00233107
		451.5	0.00211948
		453	0.00202072
		454.5	0.00195015
		456	0.00185643
		457.5	0.00174865
		459	0.0016508
		460.5	0.00156839
		462	0.00149374
		463.5	0.0014179
		465	0.00133811
		466.5	0.00126735
		468	0.0012369
		469.5	0.00127483
		471	0.00136395
		472.5	0.00142564
		474	0.00137741
		475.5	0.00121926
		477	0.00104115
		478.5	0.000941885
		480	0.000959615
		481.5	0.00106884
		483	0.00121258
		484.5	0.00133485
		486	0.00140454
		487.5	0.00142476
		489	0.00142117
		490.5	0.00141655
		492	0.00141141
		493.5	0.00138609
		495	0.00132124
		496.5	0.00121825
		498	0.00110158
		499.5	0.00100095
		501	0.000929091
		502.5	0.000874873
		504	0.000817607
		505.5	0.000748611
		507	0.000679657
		508.5	0.000631374
		510	0.000613809
		511.5	0.000617089
		513	0.000619053
		514.5	0.000601888
		516	0.000564169
		517.5	0.000520251
		519	0.000489024
		520.5	0.000480796
		522	0.000490976
		523.5	0.000503636
		525	0.00050137
		526.5	0.000474444
		528	0.000423995
		529.5	0.000358889
		531	0.000289851
		532.5	0.00022502
		534	0.000168627
		535.5	0.000122008
		537	8.51329e-05
		538.5	5.76614e-05
		540	3.94506e-05
		541.5	3.09051e-05
		543	3.33184e-05
		544.5	4.90337e-05
		546	8.11e-05
		547.5	0.000132294
		549	0.000203668
		550.5	0.00029302
		552	0.000393559
		553.5	0.000493269
		555	0.000576033
		556.5	0.000625639
		558	0.00063202
		559.5	0.000596286
		561	0.00053058
		562.5	0.000452079
		564	0.000375375
		565.5	0.000308453
		567	0.000254047
		568.5	0.000213711
		570	0.00019068
		571.5	0.000189521
		573	0.000213269
		574.5	0.000260178
		576	0.00032221
		577.5	0.000386315
		579	0.000438061
		580.5	0.000465912
		582	0.00046419
		583.5	0.000433951
		585	0.000382299
		586.5	0.000321631
		588	0.000269197
		589.5	0.000244803
		591	0.000262712
		592.5	0.00031828
		594	0.000380671
		595.5	0.000406275
		597	0.000368862
		598.5	0.000279466
		600	0.000175409
		601.5	9.11011e-05
		603	3.9576e-05
		604.5	1.55036e-05
		606	7.89424e-06
		607.5	8.71604e-06
		609	1.45596e-05
		610.5	2.4999e-05
		612	4.07448e-05
		613.5	6.24468e-05
		615	8.99181e-05
		616.5	0.00012163
		618	0.000154557
		619.5	0.0001845
		621	0.000206899
		622.5	0.000217961
		624	0.000215702
		625.5	0.000200534
		627	0.000175142
		628.5	0.000143706
		630	0.000110801
		631.5	8.03462e-05
		633	5.49828e-05
		634.5	3.59744e-05
		636	2.35677e-05
		637.5	1.75882e-05
		639	1.79962e-05
		640.5	2.52293e-05
		642	4.01274e-05
		643.5	6.34353e-05
		645	9.49895e-05
		646.5	0.000132907
		648	0.000173227
		649.5	0.000210385
		651	0.000238597
		652.5	0.000253716
		654	0.000254779
		655.5	0.000244481
		657	0.000228257
		658.5	0.000212344
		660	0.000201622
		661.5	0.00019814
		663	0.000200786
		664.5	0.000206084
		666	0.00020963
		667.5	0.000207587
		669	0.000197757
		670.5	0.000179979
		672	0.000155895
		673.5	0.000128266
		675	0.000100147
		676.5	7.41673e-05
		678	5.20879e-05
		679.5	3.46856e-05
		681	2.19115e-05
		682.5	1.31666e-05
		684	7.69991e-06
		685.5	5.04937e-06
		687	5.68573e-06
		688.5	1.19071e-05
		690	2.85775e-05
		691.5	6.24386e-05
		693	0.000118429
		694.5	0.000193368
		696	0.000271371
		697.5	0.000327237
		699	0.000339039
		700.5	0.000301814
		702	0.000230881
		703.5	0.000151856
		705	8.60877e-05
		706.5	4.25686e-05
		708	1.94716e-05
		709.5	1.04601e-05
		711	9.8866e-06
		712.5	1.47309e-05
		714	2.43143e-05
		715.5	3.9374e-05
		717	6.12826e-05
		718.5	9.1545e-05
		720	0.000131384
		721.5	0.00018127
		723	0.000240443
		724.5	0.000306434
		726	0.000374831
		727.5	0.000439609
		729	0.000494118
		730.5	0.00053261
		732	0.000551942
		733.5	0.000552682
		735	0.000539254
		736.5	0.000518982
		738	0.000500451
		739.5	0.000491782
		741	0.000499299
		742.5	0.000526709
		744	0.00057467
		745.5	0.000640624
		747	0.000718814
		748.5	0.000800721
		750	0.000876128
		751.5	0.000934783
		753	0.000968483
		754.5	0.000973042
		756	0.000949586
		757.5	0.000904835
		759	0.000850143
		760.5	0.00079962
		762	0.00076768
		763.5	0.000766642
		765	0.000804997
		766.5	0.000886748
		768	0.00101149
		769.5	0.00117408
		771	0.00136249
		772.5	0.00155448
		774	0.00171696
		775.5	0.00181251
		777	0.00181331
		778.5	0.00171539
		780	0.00154311
		781.5	0.00133998
		783	0.0011517
		784.5	0.00101162
		786	0.00093501
		787.5	0.000920986
		789	0.000957524
		790.5	0.00102649
		792	0.00110856
		793.5	0.00118867
		795	0.00126064
		796.5	0.00132846
		798	0.00140251
		799.5	0.00149208
		801	0.00159777
		802.5	0.00170834
		804	0.00180397
		805.5	0.00186464
		807	0.00187894
		808.5	0.00184859
		810	0.00178678
		811.5	0.00171215
		813	0.00164225
		814.5	0.00158876
		816	0.00155525
		817.5	0.00153689
		819	0.00152217
		820.5	0.00149679
		822	0.00144871
		823.5	0.00137238
		825	0.00127011
		826.5	0.00115049
		828	0.0010249
		829.5	0.000904514
		831	0.000798934
		832.5	0.000716266
		834	0.000663543
		835.5	0.00064635
		837	0.000667154
		838.5	0.000722741
		840	0.000802537
		841.5	0.000889511
		843	0.000964609
		844.5	0.00101337
		846	0.00103169
		847.5	0.00102741
		849	0.0010167
		850.5	0.00101682
		852	0.00103868
		853.5	0.00108219
		855	0.00113593
		856.5	0.00118099
		858	0.00119753
		859.5	0.00117226
		861	0.00110359
		862.5	0.00100208
		864	0.000885753
		865.5	0.000772531
		867	0.00067425
		868.5	0.000594718
		870	0.000531632
		871.5	0.000480018
		873	0.000434983
		874.5	0.000392974
		876	0.000351903
		877.5	0.000310848
		879	0.000269733
		880.5	0.000229104
		882	0.000189926
		883.5	0.000153399
		885	0.00012076
		886.5	9.30702e-05
		888	7.11686e-05
		889.5	5.56398e-05
		891	4.6833e-05
		892.5	4.49572e-05
		894	5.01123e-05
		895.5	6.22689e-05
		897	8.12567e-05
		898.5	0.000106745
		900	0.000138417
		901.5	0.000176333
		903	0.000221509
		904.5	0.000276242
		906	0.000343547
		907.5	0.000425067
		909	0.000517847
		910.5	0.000611867
		912	0.00069101
		913.5	0.000738483
		915	0.000744308
		916.5	0.000710248
		918	0.000648753
		919.5	0.000576845
		921	0.000509273
		922.5	0.000454793
		924	0.00041647
		925.5	0.000394226
		927	0.000387302
		928.5	0.000395603
		930	0.000419757
		931.5	0.000460228
		933	0.00051577
		934.5	0.000581954
		936	0.000650818
		937.5	0.000712559
		939	0.000758739
		940.5	0.000785085
		942	0.000791823
		943.5	0.000781526
		945	0.000756663
		946.5	0.00071911
		948	0.000671737
		949.5	0.00061999
		951	0.000571452
		952.5	0.000533352
		954	0.000509887
		955.5	0.000501197
		957	0.000504259
		958.5	0.000514799
		960	0.000528913
		961.5	0.000543832
		963	0.000557921
		964.5	0.000570268
		966	0.000580301
		967.5	0.000587533
		969	0.000591501
		970.5	0.000591818
		972	0.000588238
		973.5	0.000580772
		975	0.000569733
		976.5	0.000555829
		978	0.000540329
		979.5	0.000525309
		981	0.000513881
		982.5	0.000510157
		984	0.000518618
		985.5	0.000542657
		987	0.000582571
		988.5	0.000633757
		990	0.000686336
		991.5	0.000726993
		993	0.000742823
		994.5	0.000725654
		996	0.000674806
		997.5	0.000597013
		999	0.000503687
		1000.5	0.000407039
		1002	0.000316881
		1003.5	0.000239113
		1005	0.000175868
		1006.5	0.000126625
		1008	8.9488e-05
		1009.5	6.21302e-05
		1011	4.23534e-05
		1012.5	2.8308e-05
		1014	1.8511e-05
		1015.5	1.18154e-05
		1017	7.3417e-06
		1018.5	4.43531e-06
		1020	2.60032e-06
		1021.5	1.481e-06
		1023	8.19853e-07
		1024.5	4.42623e-07
		1026	2.49039e-07
		1027.5	1.62834e-07
		1029	1.48377e-07
		1030.5	1.92153e-07
		1032	2.97902e-07
		1033.5	4.84523e-07
		1035	7.84242e-07
		1036.5	1.25321e-06
		1038	1.95808e-06
		1039.5	2.99131e-06
		1041	4.46809e-06
		1042.5	6.53059e-06
		1044	9.33562e-06
		1045.5	1.30653e-05
		1047	1.79232e-05
		1048.5	2.41503e-05
		1050	3.20641e-05
		1051.5	4.21274e-05
		1053	5.50406e-05
		1054.5	7.18151e-05
		1056	9.37412e-05
		1057.5	0.000122143
		1059	0.000157843
		1060.5	0.000200406
		1062	0.00024741
		1063.5	0.000294165
		1065	0.000334255
		1066.5	0.000360959
		1068	0.000369179
		1069.5	0.000357086
		1071	0.000326764
		1072.5	0.000283542
		1074	0.000234314
		1075.5	0.000185607
		1077	0.000142145
		1078.5	0.000106313
		1080	7.84506e-05
		1081.5	5.75984e-05
		1083	4.22752e-05
		1084.5	3.10314e-05
		1086	2.27111e-05
		1087.5	1.64948e-05
		1089	1.18322e-05
		1090.5	8.3509e-06
		1092	5.7834e-06
		1093.5	3.92364e-06
		1095	2.60377e-06
		1096.5	1.69166e-06
		1098	1.07461e-06
		1099.5	6.67452e-07
		1101	4.05336e-07
		1102.5	2.4068e-07
		1104	1.39731e-07
		1105.5	7.93182e-08
		1107	4.40232e-08
		1108.5	2.38902e-08
		1110	1.26761e-08
		1111.5	6.57627e-09
		1113	3.33582e-09
		1114.5	0
		1116	0
		1117.5	0
		1119	0
		1120.5	0
		1122	0
		1123.5	0
		1125	0
		1126.5	0
		1128	0
		1129.5	0
		1131	0
		1132.5	0
		1134	0
		1135.5	0
		1137	0
		1138.5	0
		1140	0
		1141.5	0
		1143	0
		1144.5	0
		1146	0
		1147.5	0
		1149	0
		1150.5	0
		1152	0
		1153.5	0
		1155	0
		1156.5	0
		1158	0
		1159.5	0
		1161	0
		1162.5	0
		1164	0
		1165.5	0
		1167	0
		1168.5	0
		1170	0
		1171.5	0
		1173	0
		1174.5	0
		1176	0
		1177.5	0
		1179	0
		1180.5	0
		1182	0
		1183.5	0
		1185	0
		1186.5	0
		1188	0
		1189.5	0
		1191	0
		1192.5	0
		1194	0
		1195.5	0
		1197	0
		1198.5	0
		1200	0
		1201.5	0
		1203	0
		1204.5	0
		1206	0
		1207.5	0
		1209	0
		1210.5	0
		1212	0
		1213.5	0
		1215	0
		1216.5	0
		1218	0
		1219.5	0
		1221	0
		1222.5	0
		1224	0
		1225.5	0
		1227	0
		1228.5	0
		1230	0
		1231.5	0
		1233	0
		1234.5	0
		1236	0
		1237.5	0
		1239	0
		1240.5	0
		1242	4.14496e-09
		1243.5	7.41258e-09
		1245	1.30326e-08
		1246.5	2.25269e-08
		1248	3.82811e-08
		1249.5	6.39555e-08
		1251	1.05047e-07
		1252.5	1.69629e-07
		1254	2.69295e-07
		1255.5	4.20307e-07
		1257	6.44937e-07
		1258.5	9.72923e-07
		1260	1.44295e-06
		1261.5	2.10395e-06
		1263	3.01599e-06
		1264.5	4.25047e-06
		1266	5.88918e-06
		1267.5	8.02202e-06
		1269	1.0743e-05
		1270.5	1.41441e-05
		1272	1.83079e-05
		1273.5	2.32977e-05
		1275	2.91473e-05
		1276.5	3.58504e-05
		1278	4.33513e-05
		1279.5	5.15372e-05
		1281	6.02353e-05
		1282.5	6.92138e-05
		1284	7.81889e-05
		1285.5	8.68379e-05
		1287	9.48166e-05
		1288.5	0.000101782
		1290	0.000107416
		1291.5	0.000111449
		1293	0.000113684
		1294.5	0.000114006
		1296	0.000112401
		1297.5	0.00010895
		1299	0.000103822
		1300.5	9.72675e-05
		1302	8.95891e-05
		1303.5	8.11249e-05
		1305	7.22212e-05
		1306.5	6.321e-05
		1308	5.43899e-05
		1309.5	4.60111e-05
		1311	3.82664e-05
		1312.5	3.12885e-05
		1314	2.51514e-05
		1315.5	1.9877e-05
		1317	1.54437e-05
		1318.5	1.17967e-05
		1320	8.859e-06
		1321.5	6.54062e-06
		1323	4.74749e-06
		1324.5	3.38782e-06
		1326	2.37677e-06
		1327.5	1.63933e-06
		1329	1.11162e-06
		1330.5	7.41069e-07
		1332	4.85703e-07
		1333.5	3.12964e-07
		1335	1.98258e-07
		1336.5	1.23474e-07
		1338	7.56021e-08
		1339.5	4.55096e-08
		1341	2.69329e-08
		1342.5	1.56702e-08
		1344	8.96349e-09
		1345.5	5.0407e-09
		1347	0
		1348.5	0
		1350	0
		1351.5	0
		1353	0
		1354.5	0
		1356	0
		1357.5	0
		1359	0
		1360.5	0
		1362	0
		1363.5	0
		1365	0
		1366.5	0
		1368	0
		1369.5	0
		1371	0
		1372.5	0
		1374	0
		1375.5	0
		1377	0
		1378.5	0
		1380	0
		1381.5	0
		1383	0
		1384.5	0
		1386	0
		1387.5	0
		1389	0
		1390.5	0
		1392	0
		1393.5	0
		1395	0
		1396.5	4.44775e-09
		1398	1.09397e-08
		1399.5	2.58523e-08
		1401	5.86976e-08
		1402.5	1.28047e-07
		1404	2.68379e-07
		1405.5	5.44358e-07
		1407	1.05599e-06
		1408.5	1.96988e-06
		1410	3.53459e-06
		1411.5	6.10728e-06
		1413	1.0153e-05
		1414.5	1.6253e-05
		1416	2.5076e-05
		1417.5	3.73173e-05
		1419	5.36174e-05
		1420.5	7.44628e-05
		1422	0.00010009
		1423.5	0.000130411
		1425	0.000164986
		1426.5	0.000203028
		1428	0.000243456
		1429.5	0.000284938
		1431	0.000325924
		1432.5	0.000364642
		1434	0.000399087
		1435.5	0.000427017
		1437	0.000446089
		1438.5	0.000454109
		1440	0.000449422
		1441.5	0.000431376
		1443	0.000400687
		1444.5	0.000359586
		1446	0.000311642
		1447.5	0.000261272
		1449	0.000213065
		1450.5	0.00017109
		1452	0.000138376
		1453.5	0.000116643
		1455	0.000106303
		1456.5	0.000106646
		1458	0.000116089
		1459.5	0.000132455
		1461	0.000153188
		1462.5	0.000175573
		1464	0.00019695
		1465.5	0.000214975
		1467	0.000227878
		1468.5	0.000234721
		1470	0.000235532
		1471.5	0.000231311
		1473	0.0002239
		1474.5	0.000215639
		1476	0.000208973
		1477.5	0.00020598
		1479	0.000207965
		1480.5	0.000215172
		1482	0.000226677
		1483.5	0.000240508
		1485	0.000253986
		1486.5	0.000264236
		1488	0.000268753
		1489.5	0.00026591
		1491	0.000255275
		1492.5	0.00023766
		1494	0.000214906
		1495.5	0.000189469
		1497	0.000163928
		1498.5	0.000140545
		1500	0.000120966
		1501.5	0.000106102
		1503	9.61746e-05
		1504.5	9.08741e-05
		1506	8.95267e-05
		1507.5	9.12895e-05
		1509	9.52739e-05
		1510.5	0.000100626
		1512	0.000106568
		1513.5	0.00011241
		1515	0.000117558
		1516.5	0.000121519
		1518	0.000123906
		1519.5	0.000124453
		1521	0.00012302
		1522.5	0.000119591
		1524	0.000114285
		1525.5	0.000107319
		1527	9.9005e-05
		1528.5	8.97102e-05
		1530	7.98307e-05
		1531.5	6.97578e-05
		1533	5.98514e-05
		1534.5	5.04181e-05
		1536	4.16972e-05
		1537.5	3.38549e-05
		1539	2.69845e-05
		1540.5	2.11143e-05
		1542	1.62182e-05
		1543.5	1.22287e-05
		1545	9.05132e-06
		1546.5	6.57641e-06
		1548	4.6904e-06
		1549.5	3.28377e-06
		1551	2.25671e-06
		1552.5	1.52236e-06
		1554	1.0048e-06
		1555.5	6.53121e-07
		1557	4.16707e-07
		1558.5	2.6097e-07
		1560	1.60427e-07
		1561.5	9.68024e-08
		1563	5.7335e-08
		1564.5	3.33333e-08
		1566	1.90222e-08
		1567.5	1.06553e-08
		1569	5.85865e-09
		1570.5	0
		1572	0
		1573.5	0
		1575	0
		1576.5	0
		1578	0
		1579.5	0
		1581	0
		1582.5	0
		1584	0
		1585.5	0
		1587	0
		1588.5	0
		1590	0
		1591.5	0
		1593	0
		1594.5	5.50014e-09
		1596	9.30334e-09
		1597.5	1.55114e-08
		1599	2.54922e-08
		1600.5	4.12963e-08
		1602	6.59419e-08
		1603.5	1.0379e-07
		1605	1.61027e-07
		1606.5	2.46257e-07
		1608	3.71212e-07
		1609.5	5.51573e-07
		1611	8.07848e-07
		1612.5	1.16628e-06
		1614	1.65967e-06
		1615.5	2.32802e-06
		1617	3.21883e-06
		1618.5	4.38688e-06
		1620	5.89331e-06
		1621.5	7.80386e-06
		1623	1.0186e-05
		1624.5	1.31053e-05
		1626	1.66202e-05
		1627.5	2.07798e-05
		1629	2.5606e-05
		1630.5	3.11025e-05
		1632	3.72394e-05
		1633.5	4.39591e-05
		1635	5.11501e-05
		1636.5	5.86669e-05
		1638	6.63336e-05
		1639.5	7.3941e-05
		1641	8.12593e-05
		1642.5	8.80504e-05
		1644	9.40823e-05
		1645.5	9.91447e-05
		1647	0.000103069
		1648.5	0.000105731
		1650	0.000107076
		1651.5	0.000107124
		1653	0.000105972
		1654.5	0.000103798
		1656	0.00010086
		1657.5	9.74901e-05
		1659	9.40919e-05
		1660.5	9.11307e-05
		1662	8.91273e-05
		1663.5	8.86476e-05
		1665	9.02881e-05
		1666.5	9.46541e-05
		1668	0.000102327
		1669.5	0.000113819
		1671	0.000129513
		1672.5	0.000149596
		1674	0.000173993
		1675.5	0.000202308
		1677	0.000233794
		1678.5	0.000267369
		1680	0.000301674
		1681.5	0.000335176
		1683	0.000366318
		1684.5	0.000393675
		1686	0.0004161
		1687.5	0.000432836
		1689	0.000443575
		1690.5	0.000448424
		1692	0.000447858
		1693.5	0.000442594
		1695	0.000433463
		1696.5	0.000421289
		1698	0.000406798
		1699.5	0.00039057
		1701	0.000373025
		1702.5	0.000354444
		1704	0.000335017
		1705.5	0.000314896
		1707	0.000294232
		1708.5	0.000273226
		1710	0.000252129
		1711.5	0.000231268
		1713	0.000211042
		1714.5	0.000191915
		1716	0.000174411
		1717.5	0.000159103
		1719	0.000146593
		1720.5	0.000137484
		1722	0.00013233
		1723.5	0.00013157
		1725	0.000135441
		1726.5	0.000143888
		1728	0.000156489
		1729.5	0.000172402
		1731	0.000190385
		1732.5	0.000208868
		1734	0.000226123
		1735.5	0.000240458
		1737	0.000250433
		1738.5	0.000255063
		1740	0.000253938
		1741.5	0.000247252
		1743	0.000235732
		1744.5	0.000220491
		1746	0.000202828
		1747.5	0.000184034
		1749	0.000165223
		1750.5	0.000147241
		1752	0.000130624
		1753.5	0.000115632
		1755	0.000102298
		1756.5	9.05284e-05
		1758	8.01627e-05
		1759.5	7.10414e-05
		1761	6.30349e-05
		1762.5	5.60718e-05
		1764	5.01179e-05
		1765.5	4.51926e-05
		1767	4.13297e-05
		1768.5	3.85823e-05
		1770	3.69953e-05
		1771.5	3.66146e-05
		1773	3.74686e-05
		1774.5	3.95884e-05
		1776	4.29647e-05
		1777.5	4.75983e-05
		1779	5.34689e-05
		1780.5	6.05438e-05
		1782	6.87766e-05
		1783.5	7.81217e-05
		1785	8.8522e-05
		1786.5	9.98959e-05
		1788	0.000112172
		1789.5	0.000125269
		1791	0.000139102
		1792.5	0.000153589
		1794	0.000168646
		1795.5	0.000184203
		1797	0.000200211
		1798.5	0.000216632
		1800	0.000233459
		1801.5	0.000250719
		1803	0.000268468
		1804.5	0.00028681
		1806	0.00030587
		1807.5	0.000325793
		1809	0.000346733
		1810.5	0.00036881
		1812	0.000392115
		1813.5	0.000416638
		1815	0.000442284
		1816.5	0.000468835
		1818	0.000495973
		1819.5	0.000523264
		1821	0.000550236
		1822.5	0.000576408
		1824	0.000601348
		1825.5	0.000624761
		1827	0.000646519
		1828.5	0.0006667
		1830	0.000685596
		1831.5	0.000703701
		1833	0.000721669
		1834.5	0.000740264
		1836	0.000760307
		1837.5	0.000782628
		1839	0.000808028
		1840.5	0.000837289
		1842	0.000871177
		1843.5	0.000910445
		1845	0.000955874
		1846.5	0.00100825
		1848	0.00106834
		1849.5	0.00113683
		1851	0.00121415
		1852.5	0.0013004
		1854	0.00139511
		1855.5	0.00149711
		1857	0.00160446
		1858.5	0.00171438
		1860	0.00182338
		1861.5	0.00192744
		1863	0.00202233
		1864.5	0.00210396
		1866	0.00216872
		1867.5	0.00221386
		1869	0.00223764
		1870.5	0.00223952
		1872	0.00222006
		1873.5	0.00218081
		1875	0.00212406
		1876.5	0.00205262
		1878	0.00196951
		1879.5	0.00187773
		1881	0.00178016
		1882.5	0.00167938
		1884	0.00157769
		1885.5	0.00147702
		1887	0.00137901
		1888.5	0.00128497
		1890	0.00119592
		1891.5	0.00111254
		1893	0.00103521
		1894.5	0.000963977
		1896	0.000898613
		1897.5	0.000838649
		1899	0.00078344
		1900.5	0.000732252
		1902	0.000684353
		1903.5	0.000639094
		1905	0.000595963
		1906.5	0.000554639
		1908	0.000515001
		1909.5	0.000477097
		1911	0.000441118
		1912.5	0.000407368
		1914	0.000376173
		1915.5	0.000347895
		1917	0.000322856
		1918.5	0.000301338
		1920	0.000283595
		1921.5	0.000269824
		1923	0.000260188
		1924.5	0.000254807
		1926	0.000253732
		1927.5	0.000256904
		1929	0.000264112
		1930.5	0.000274949
		1932	0.000288744
		1933.5	0.000304564
		1935	0.000321252
		1936.5	0.000337456
		1938	0.000351778
		1939.5	0.000362898
		1941	0.000369724
		1942.5	0.000371516
		1944	0.000367962
		1945.5	0.00035921
		1947	0.000345803
		1948.5	0.000328597
		1950	0.000308623
		1951.5	0.00028694
		1953	0.00026452
		1954.5	0.000242174
		1956	0.000220489
		1957.5	0.00019984
		1959	0.000180418
		1960.5	0.000162288
		1962	0.000145423
		1963.5	0.00012977
		1965	0.000115273
		1966.5	0.000101896
		1968	8.96232e-05
		1969.5	7.84723e-05
		1971	6.84629e-05
		1972.5	5.96228e-05
		1974	5.19747e-05
		1975.5	4.55294e-05
		1977	4.02802e-05
		1978.5	3.6213e-05
		1980	3.329e-05
		1981.5	3.1463e-05
		1983	3.06876e-05
		1984.5	3.09012e-05
		1986	3.20472e-05
		1987.5	3.40703e-05
		1989	3.69184e-05
		1990.5	4.05396e-05
		1992	4.48958e-05
		1993.5	4.99382e-05
		1995	5.56223e-05
		1996.5	6.19005e-05
		1998	6.87185e-05
		1999.5	7.60131e-05
		2001	8.37083e-05
		2002.5	9.17135e-05
		2004	9.99217e-05
		2005.5	0.000108212
		2007	0.00011644
		2008.5	0.000124454
		2010	0.000132085
		2011.5	0.000139173
		2013	0.000145548
		2014.5	0.000151056
		2016	0.000155567
		2017.5	0.000158994
		2019	0.000161288
		2020.5	0.000162469
		2022	0.000162626
		2023.5	0.000161928
		2025	0.000160623
		2026.5	0.000159032
		2028	0.000157527
		2029.5	0.000156499
		2031	0.000156317
		2032.5	0.000157276
		2034	0.000159541
		2035.5	0.000163101
		2037	0.000167734
		2038.5	0.000173005
		2040	0.000178287
		2041.5	0.000182821
		2043	0.000185799
		2044.5	0.000186471
		2046	0.000184241
		2047.5	0.000178761
		2049	0.000169976
		2050.5	0.00015814
		2052	0.000143782
		2053.5	0.000127637
		2055	0.000110549
		2056.5	9.33738e-05
		2058	7.68833e-05
		2059.5	6.16995e-05
		2061	4.82534e-05
		2062.5	3.67765e-05
		2064	2.73185e-05
		2065.5	1.97829e-05
		2067	1.3971e-05
		2068.5	9.62747e-06
		2070	6.47858e-06
		2071.5	4.26184e-06
		2073	2.7447e-06
		2074.5	1.73389e-06
		2076	1.0772e-06
		2077.5	6.60329e-07
		2079	4.01074e-07
		2080.5	2.42573e-07
		2082	1.469e-07
		2083.5	8.95806e-08
		2085	5.52815e-08
		2086.5	3.14496e-08
		2088	2.01278e-08
		2089.5	1.10259e-08
		2091	7.74649e-09
		2092.5	5.40479e-09
		2094	3.74487e-09
		2095.5	0
		2097	0
		2098.5	0
		2100	0
		2101.5	0
		2103	0
		2104.5	0
		2106	0
		2107.5	0
		2109	0
		2110.5	0
		2112	0
		2113.5	0
		2115	0
		2116.5	0
		2118	0
		2119.5	0
		2121	0
		2122.5	0
		2124	0
		2125.5	0
		2127	0
		2128.5	0
		2130	0
		2131.5	0
		2133	0
		2134.5	0
		2136	0
		2137.5	0
		2139	0
		2140.5	0
		2142	0
		2143.5	0
		2145	0
		2146.5	0
		2148	0
		2149.5	0
		2151	0
		2152.5	0
		2154	0
		2155.5	0
		2157	0
		2158.5	0
		2160	0
		2161.5	0
		2163	0
		2164.5	0
		2166	0
		2167.5	0
		2169	0
		2170.5	0
		2172	0
		2173.5	0
		2175	0
		2176.5	0
		2178	0
		2179.5	0
		2181	0
		2182.5	0
		2184	0
		2185.5	0
		2187	0
		2188.5	0
		2190	0
		2191.5	0
		2193	0
		2194.5	0
		2196	0
		2197.5	0
		2199	0
		2200.5	0
		2202	0
		2203.5	0
		2205	0
		2206.5	0
		2208	0
		2209.5	0
		2211	0
		2212.5	0
		2214	0
		2215.5	0
		2217	0
		2218.5	0
		2220	0
		2221.5	0
		2223	0
		2224.5	0
		2226	0
		2227.5	0
		2229	0
		2230.5	0
		2232	0
		2233.5	0
		2235	0
		2236.5	0
		2238	0
		2239.5	0
		2241	0
		2242.5	4.57798e-09
		2244	6.33804e-09
		2245.5	8.72557e-09
		2247	1.19451e-08
		2248.5	1.62608e-08
		2250	2.20116e-08
		2251.5	2.96291e-08
		2253	3.96591e-08
		2254.5	5.27866e-08
		2256	6.98654e-08
		2257.5	9.19512e-08
		2259	1.2034e-07
		2260.5	1.5661e-07
		2262	2.02668e-07
		2263.5	2.60801e-07
		2265	3.33726e-07
		2266.5	4.24647e-07
		2268	5.37307e-07
		2269.5	6.76044e-07
		2271	8.49167e-07
		2272.5	1.0589e-06
		2274	1.31456e-06
		2275.5	1.62549e-06
		2277	2.00328e-06
		2278.5	2.46266e-06
		2280	3.02268e-06
		2281.5	3.70842e-06
		2283	4.55308e-06
		2284.5	5.60072e-06
		2286	6.90927e-06
		2287.5	8.55369e-06
		2289	1.06288e-05
		2290.5	1.3251e-05
		2292	1.6558e-05
		2293.5	2.07055e-05
		2295	2.58597e-05
		2296.5	3.21852e-05
		2298	3.98278e-05
		2299.5	4.88926e-05
		2301	5.94199e-05
		2302.5	7.1361e-05
		2304	8.45571e-05
		2305.5	9.87274e-05
		2307	0.000113467
		2308.5	0.000128261
		2310	0.000142513
		2311.5	0.000155588
		2313	0.000166863
		2314.5	0.000175788
		2316	0.000181935
		2317.5	0.000185041
		2319	0.000185038
		2320.5	0.00018205
		2322	0.000176382
		2323.5	0.000168481
		2325	0.00015889
		2326.5	0.000148191
		2328	0.000136951
		2329.5	0.000125677
		2331	0.000114786
		2332.5	0.000104586
		2334	9.526e-05
		2335.5	8.68953e-05
		2337	7.94896e-05
		2338.5	7.2976e-05
		2340	6.72463e-05
		2341.5	6.21738e-05
		2343	5.763e-05
		2344.5	5.34976e-05
		2346	4.96786e-05
		2347.5	4.60969e-05
		2349	4.2699e-05
		2350.5	3.94513e-05
		2352	3.63424e-05
		2353.5	3.33624e-05
		2355	3.05208e-05
		2356.5	2.78313e-05
		2358	2.53169e-05
		2359.5	2.29944e-05
		2361	2.08946e-05
		2362.5	1.90514e-05
		2364	1.75047e-05
		2365.5	1.63125e-05
		2367	1.55387e-05
		2368.5	1.52689e-05
		2370	1.5609e-05
		2371.5	1.66868e-05
		2373	1.86501e-05
		2374.5	2.16614e-05
		2376	2.58877e-05
		2377.5	3.14855e-05
		2379	3.85853e-05
		2380.5	4.72519e-05
		2382	5.74821e-05
		2383.5	6.91722e-05
		2385	8.20922e-05
		2386.5	9.58982e-05
		2388	0.000110129
		2389.5	0.000124232
		2391	0.000137601
		2392.5	0.000149624
		2394	0.000159742
		2395.5	0.0001675
		2397	0.000172595
		2398.5	0.000174905
		2400	0.000174504
		2401.5	0.000171646
		2403	0.000166741
		2404.5	0.000160303
		2406	0.000152904
		2407.5	0.000145111
		2409	0.000137442
		2410.5	0.000130334
		2412	0.000124106
		2413.5	0.000118961
		2415	0.000114993
		2416.5	0.000112205
		2418	0.000110523
		2419.5	0.000109828
		2421	0.000109985
		2422.5	0.000110851
		2424	0.0001123
		2425.5	0.000114235
		2427	0.000116592
		2428.5	0.000119344
		2430	0.000122501
		2431.5	0.000126108
		2433	0.000130239
		2434.5	0.000134995
		2436	0.000140479
		2437.5	0.00014681
		2439	0.000154092
		2440.5	0.000162409
		2442	0.000171805
		2443.5	0.000182268
		2445	0.00019373
		2446.5	0.000206038
		2448	0.000218964
		2449.5	0.000232205
		2451	0.000245394
		2452.5	0.000258131
		2454	0.000269974
		2455.5	0.000280508
		2457	0.000289361
		2458.5	0.000296235
		2460	0.000300938
		2461.5	0.000303384
		2463	0.000303621
		2464.5	0.000301818
		2466	0.000298251
		2467.5	0.000293286
		2469	0.00028735
		2470.5	0.000280903
		2472	0.000274413
		2473.5	0.000268337
		2475	0.000263099
		2476.5	0.000259081
		2478	0.000256625
		2479.5	0.000256017
		2481	0.000257506
		2482.5	0.000261289
		2484	0.000267519
		2485.5	0.000276296
		2487	0.000287657
		2488.5	0.000301569
		2490	0.000317912
		2491.5	0.000336472
		2493	0.000356933
		2494.5	0.000378874
		2496	0.000401779
		2497.5	0.00042505
		2499	0.000448031
		2500.5	0.000470041
		2502	0.000490406
		2503.5	0.000508498
		2505	0.000523763
		2506.5	0.000535761
		2508	0.000544168
		2509.5	0.000548792
		2511	0.000549573
		2512.5	0.000546572
		2514	0.000539937
		2515.5	0.000529894
		2517	0.000516713
		2518.5	0.000500689
		2520	0.000482121
		2521.5	0.000461305
		2523	0.000438528
		2524.5	0.000414074
		2526	0.000388227
		2527.5	0.000361287
		2529	0.00033357
		2530.5	0.000305418
		2532	0.000277195
		2533.5	0.000249277
		2535	0.000222042
		2536.5	0.000195861
		2538	0.000171063
		2539.5	0.000147929
		2541	0.000126678
		2542.5	0.000107455
		2544	9.03309e-05
		2545.5	7.53025e-05
		2547	6.23022e-05
		2548.5	5.12089e-05
		2550	4.18624e-05
		2551.5	3.40776e-05
		2553	2.76585e-05
		2554.5	2.24098e-05
		2556	1.8146e-05
		2557.5	1.46957e-05
		2559	1.19153e-05
		2560.5	9.67363e-06
		2562	7.86164e-06
		2563.5	6.3985e-06
		2565	5.20766e-06
		2566.5	4.24164e-06
		2568	3.45192e-06
		2569.5	2.79965e-06
		2571	2.26993e-06
		2572.5	1.83194e-06
		2574	1.47374e-06
		2575.5	1.1828e-06
		2577	9.44749e-07
		2578.5	7.47615e-07
		2580	5.91795e-07
		2581.5	4.65688e-07
		2583	3.64291e-07
		2584.5	2.83291e-07
		2586	2.19001e-07
		2587.5	1.68303e-07
		2589	1.28578e-07
		2590.5	9.76495e-08
		2592	7.37234e-08
		2593.5	5.53312e-08
		2595	4.12825e-08
		2596.5	3.0619e-08
		2598	2.2576e-08
		2599.5	1.65475e-08
		2601	1.20573e-08
		2602.5	8.73365e-09
		2604	6.28887e-09
		2605.5	4.50173e-09
		2607	0
		2608.5	0
		2610	4.24783e-09
		2611.5	5.79376e-09
		2613	7.8621e-09
		2614.5	1.06145e-08
		2616	1.42576e-08
		2617.5	1.90536e-08
		2619	2.53334e-08
		2620.5	3.35114e-08
		2622	4.41037e-08
		2623.5	5.77488e-08
		2625	7.52306e-08
		2626.5	9.75058e-08
		2628	1.25733e-07
		2629.5	1.61308e-07
		2631	2.05894e-07
		2632.5	2.61466e-07
		2634	3.30349e-07
		2635.5	4.15254e-07
		2637	5.19325e-07
		2638.5	6.46173e-07
		2640	7.99913e-07
		2641.5	9.85192e-07
		2643	1.20721e-06
		2644.5	1.47173e-06
		2646	1.78509e-06
		2647.5	2.15415e-06
		2649	2.58627e-06
		2650.5	3.08928e-06
		2652	3.67134e-06
		2653.5	4.34087e-06
		2655	5.10637e-06
		2656.5	5.9763e-06
		2658	6.95884e-06
		2659.5	8.06168e-06
		2661	9.29177e-06
		2662.5	1.0655e-05
		2664	1.21562e-05
		2665.5	1.37982e-05
		2667	1.55823e-05
		2668.5	1.75076e-05
		2670	1.95706e-05
		2671.5	2.17654e-05
		2673	2.40831e-05
		2674.5	2.6512e-05
		2676	2.90374e-05
		2677.5	3.16415e-05
		2679	3.43036e-05
		2680.5	3.70005e-05
		2682	3.97104e-05
		2683.5	4.23983e-05
		2685	4.50379e-05
		2686.5	4.75986e-05
		2688	5.00492e-05
		2689.5	5.23584e-05
		2691	5.44959e-05
		2692.5	5.64325e-05
		2694	5.81412e-05
		2695.5	5.95977e-05
		2697	6.07809e-05
		2698.5	6.16735e-05
		2700	6.22624e-05
		2701.5	6.25391e-05
		2703	6.25e-05
		2704.5	6.21462e-05
		2706	6.14838e-05
		2707.5	6.05238e-05
		2709	5.92814e-05
		2710.5	5.77762e-05
		2712	5.60312e-05
		2713.5	5.4073e-05
		2715	5.19302e-05
		2716.5	4.96338e-05
		2718	4.72156e-05
		2719.5	4.47085e-05
		2721	4.21449e-05
		2722.5	3.95567e-05
		2724	3.69748e-05
		2725.5	3.44282e-05
		2727	3.19438e-05
		2728.5	2.95461e-05
		2730	2.72572e-05
		2731.5	2.50961e-05
		2733	2.30789e-05
		2734.5	2.12189e-05
		2736	1.95266e-05
		2737.5	1.80099e-05
		2739	1.66738e-05
		2740.5	1.55213e-05
		2742	1.45533e-05
		2743.5	1.37687e-05
		2745	1.31648e-05
		2746.5	1.27378e-05
		2748	1.24824e-05
		2749.5	1.23929e-05
		2751	1.24624e-05
		2752.5	1.26837e-05
		2754	1.30492e-05
		2755.5	1.3551e-05
		2757	1.41809e-05
		2758.5	1.49305e-05
		2760	1.57915e-05
		2761.5	1.67553e-05
		2763	1.78132e-05
		2764.5	1.89565e-05
		2766	2.01762e-05
		2767.5	2.14632e-05
		2769	2.28082e-05
		2770.5	2.42018e-05
		2772	2.56342e-05
		2773.5	2.70956e-05
		2775	2.85756e-05
		2776.5	3.00641e-05
		2778	3.15504e-05
		2779.5	3.30239e-05
		2781	3.44739e-05
		2782.5	3.58896e-05
		2784	3.72605e-05
		2785.5	3.85759e-05
		2787	3.98257e-05
		2788.5	4.09999e-05
		2790	4.20892e-05
		2791.5	4.30845e-05
		2793	4.39778e-05
		2794.5	4.47616e-05
		2796	4.54264e-05
		2797.5	4.59728e-05
		2799	4.63925e-05
		2800.5	4.66819e-05
		2802	4.68385e-05
		2803.5	4.68609e-05
		2805	4.67489e-05
		2806.5	4.65036e-05
		2808	4.6127e-05
		2809.5	4.56223e-05
		2811	4.49939e-05
		2812.5	4.42469e-05
		2814	4.33876e-05
		2815.5	4.24231e-05
		2817	4.13612e-05
		2818.5	4.02102e-05
		2820	3.89793e-05
		2821.5	3.76778e-05
		2823	3.63153e-05
		2824.5	3.49019e-05
		2826	3.34473e-05
		2827.5	3.19614e-05
		2829	3.04541e-05
		2830.5	2.89347e-05
		2832	2.74123e-05
		2833.5	2.58955e-05
		2835	2.43926e-05
		2836.5	2.29111e-05
		2838	2.14579e-05
		2839.5	2.00393e-05
		2841	1.86608e-05
		2842.5	1.73273e-05
		2844	1.60431e-05
		2845.5	1.48114e-05
		2847	1.36351e-05
		2848.5	1.25163e-05
		2850	1.14563e-05
		2851.5	1.04561e-05
		2853	9.51581e-06
		2854.5	8.63528e-06
		2856	7.81378e-06
		2857.5	7.05016e-06
		2859	6.34294e-06
		2860.5	5.69031e-06
		2862	5.0902e-06
		2863.5	4.54033e-06
		2865	4.03825e-06
		2866.5	3.5814e-06
		2868	3.16713e-06
		2869.5	2.79276e-06
		2871	2.45558e-06
		2872.5	2.15292e-06
		2874	1.88216e-06
		2875.5	1.64073e-06
		2877	1.42617e-06
		2878.5	1.23612e-06
		2880	1.06833e-06
		2881.5	9.20661e-07
		2883	7.91132e-07
		2884.5	6.77879e-07
		2886	5.79174e-07
		2887.5	4.93423e-07
		2889	4.19164e-07
		2890.5	3.55059e-07
		2892	2.99897e-07
		2893.5	2.52579e-07
		2895	2.12117e-07
		2896.5	1.77627e-07
		2898	1.48318e-07
		2899.5	1.2349e-07
		2901	1.02524e-07
		2902.5	8.48736e-08
		2904	7.00604e-08
		2905.5	5.76669e-08
		2907	4.73297e-08
		2908.5	3.87342e-08
		2910	3.16089e-08
		2911.5	2.57204e-08
		2913	2.08689e-08
		2914.5	1.6884e-08
		2916	1.36209e-08
		2917.5	1.09569e-08
		2919	8.78869e-09
		2920.5	7.02933e-09
		2922	5.60606e-09
		2923.5	4.45815e-09
		2925	3.53513e-09
		2926.5	0
		2928	0
		2929.5	0
		2931	0
		2932.5	0
		2934	0
		2935.5	0
		2937	0
		2938.5	0
		2940	0
		2941.5	0
		2943	0
		2944.5	0
		2946	0
		2947.5	0
		2949	0
		2950.5	0
		2952	0
		2953.5	0
		2955	0
		2956.5	0
		2958	0
		2959.5	0
		2961	0
		2962.5	0
		2964	0
		2965.5	0
		2967	0
		2968.5	0
		2970	0
		2971.5	0
		2973	0
		2974.5	0
		2976	0
		2977.5	0
		2979	0
		2980.5	0
		2982	0
		2983.5	0
		2985	0
		2986.5	0
		2988	0
		2989.5	0
		2991	0
		2992.5	0
		2994	0
		2995.5	0
		2997	0
		2998.5	0
[truncated: 1 more rows]
